# Supplementary material for: In Vitro detection of Chronic Wasting Disease (CWD) prions in semen and reproductive tissues of white tailed deer bucks (Odocoileus virginianus)
Source: PubMed Central journal article supplement (PMC6936793; doi:10.1371/journal.pone.0226560), 2019-12-30

Figure 1

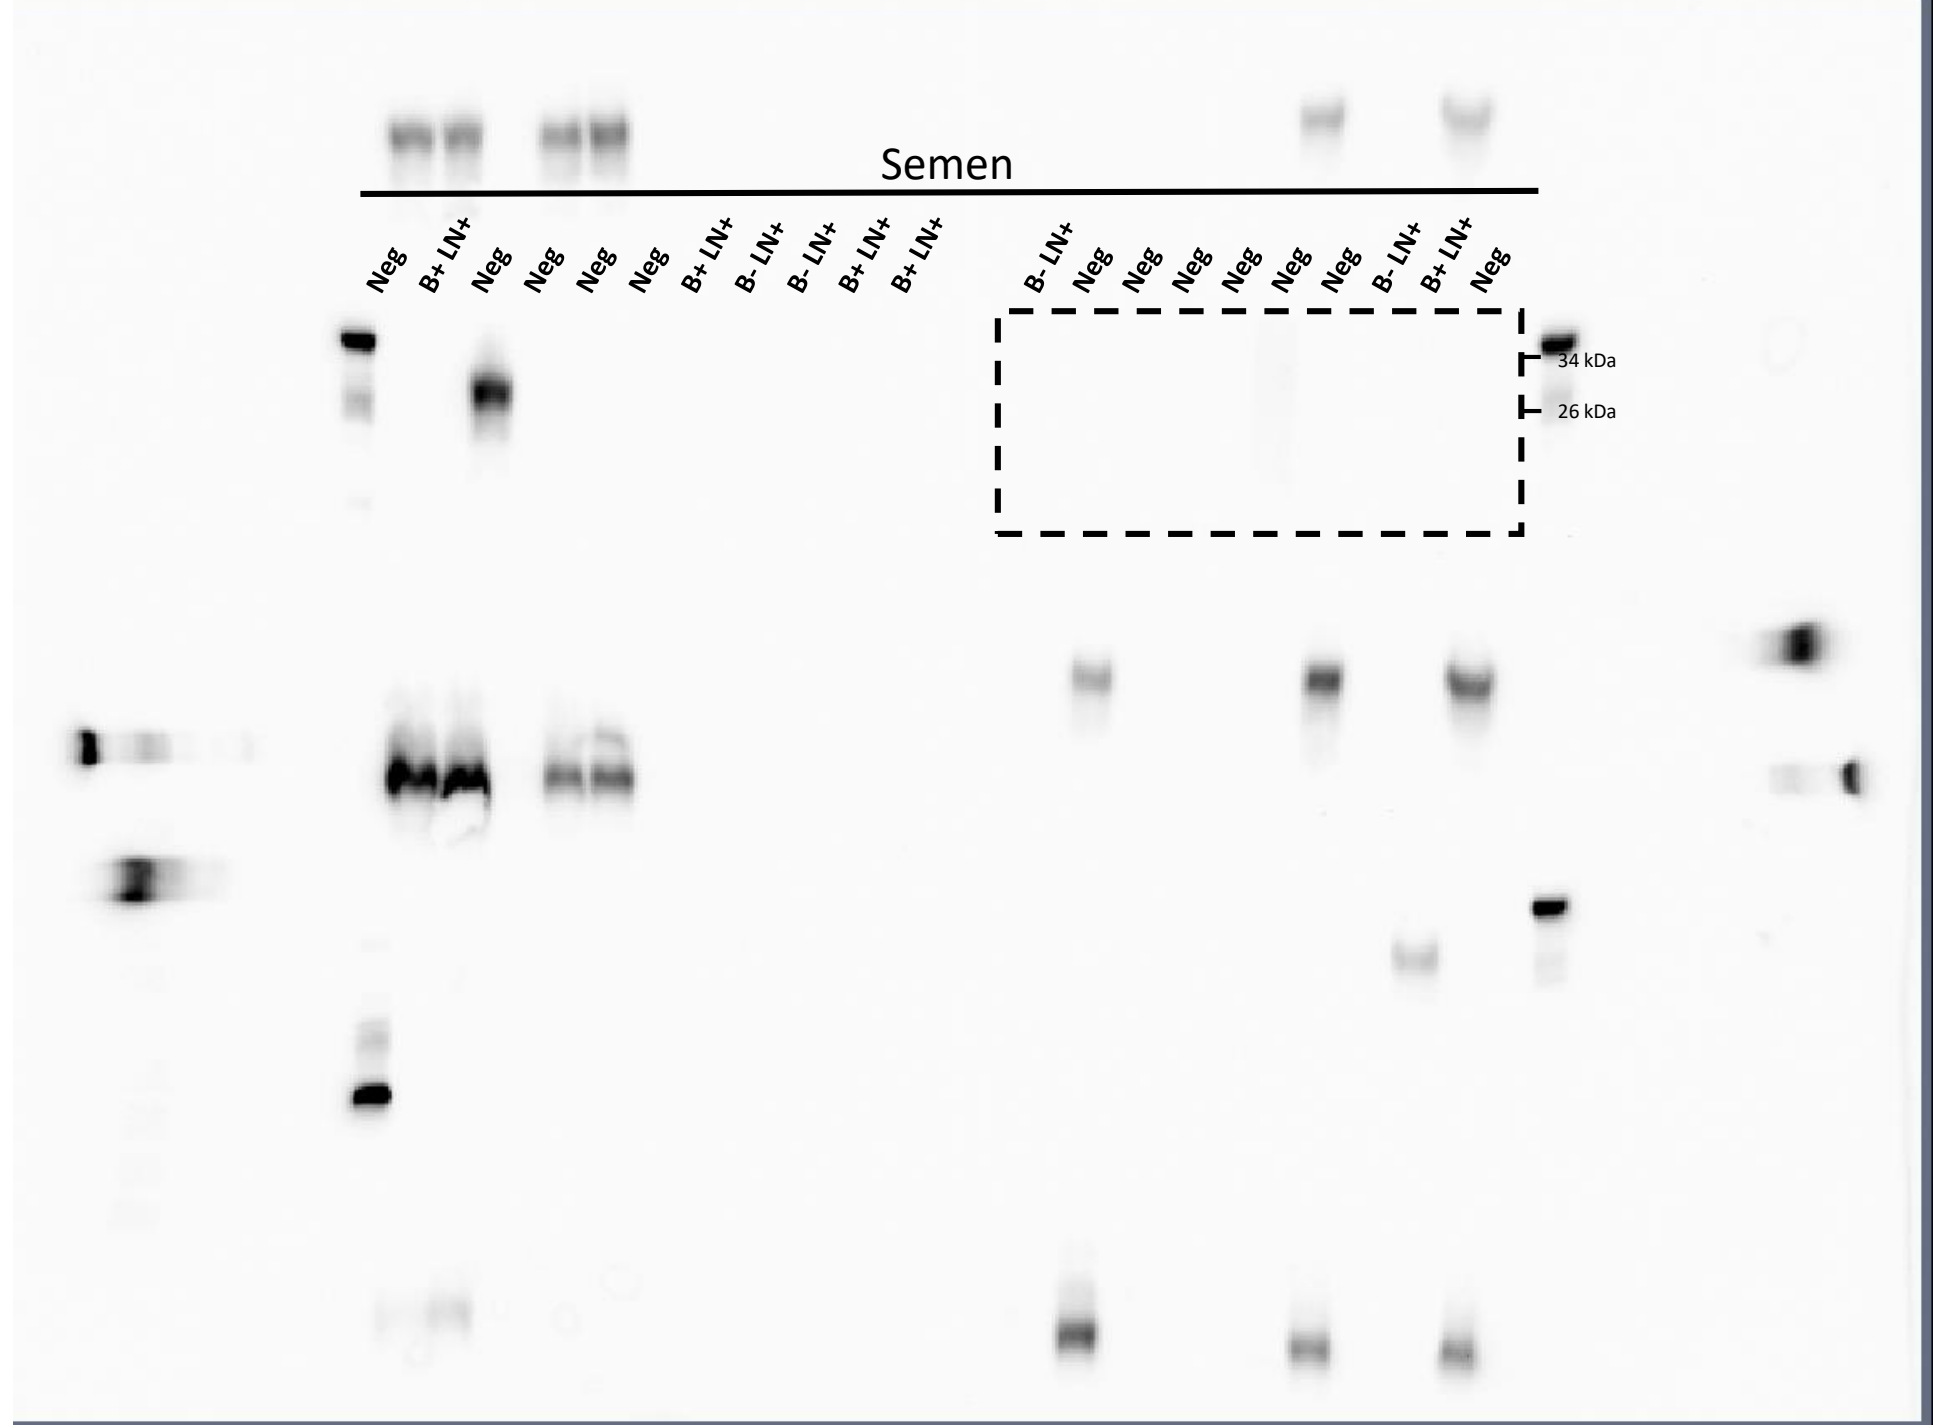

Figure 1

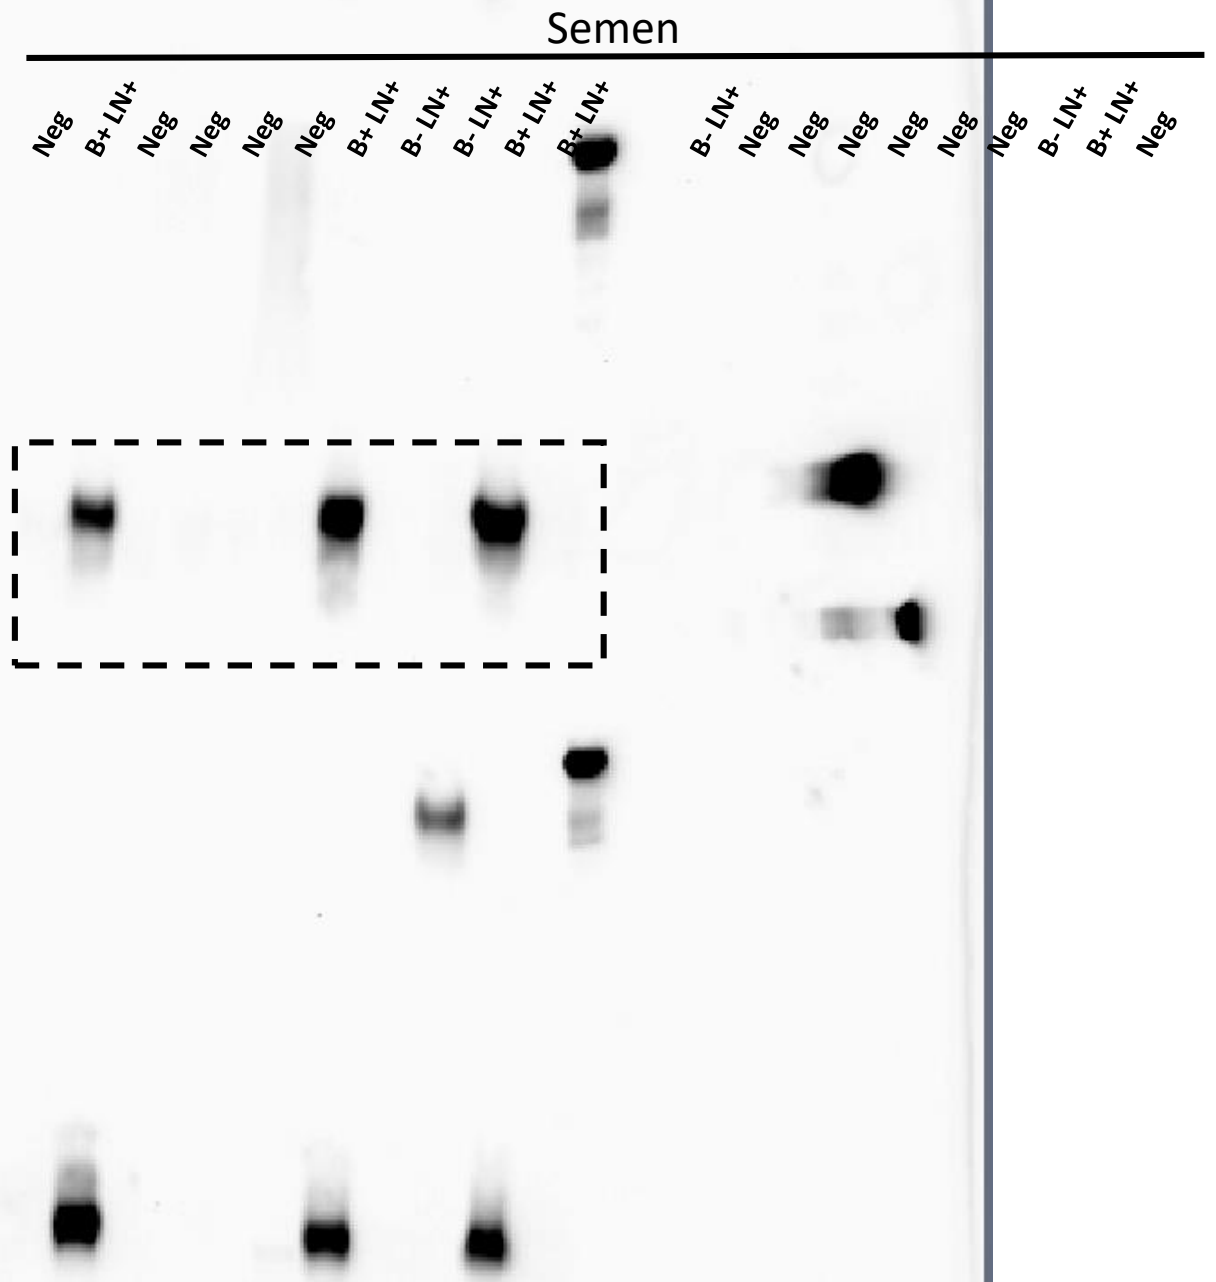

Figure 1

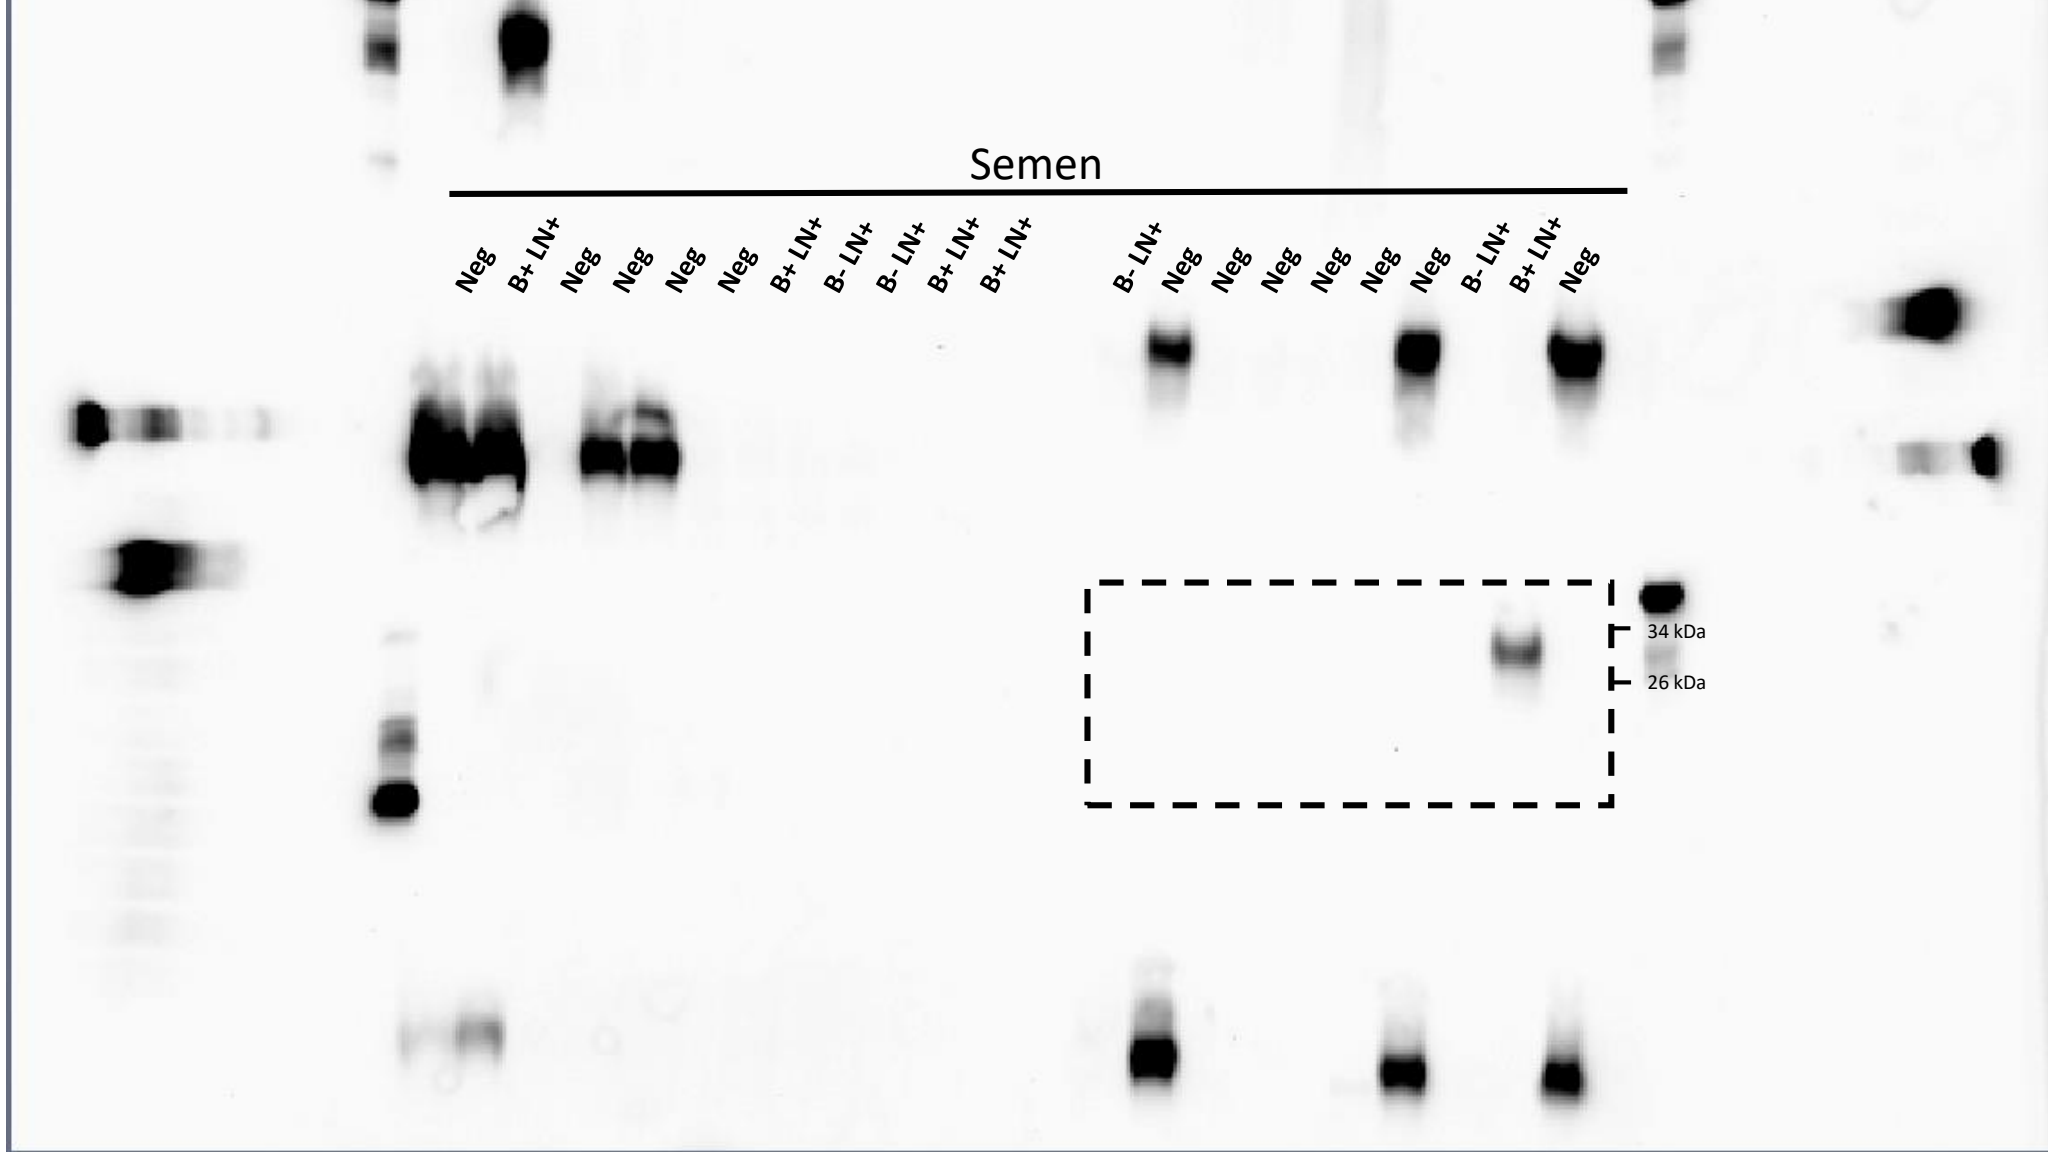

Figure 1

Semen

---

Neg B+ LN+ Neg Neg Neg Neg B+ LN+ B- LN+ B- LN+ B+ LN+ B+ LN+      B- LN+ Neg Neg Neg Neg Neg Neg Neg B- LN+ B+ LN+ Neg

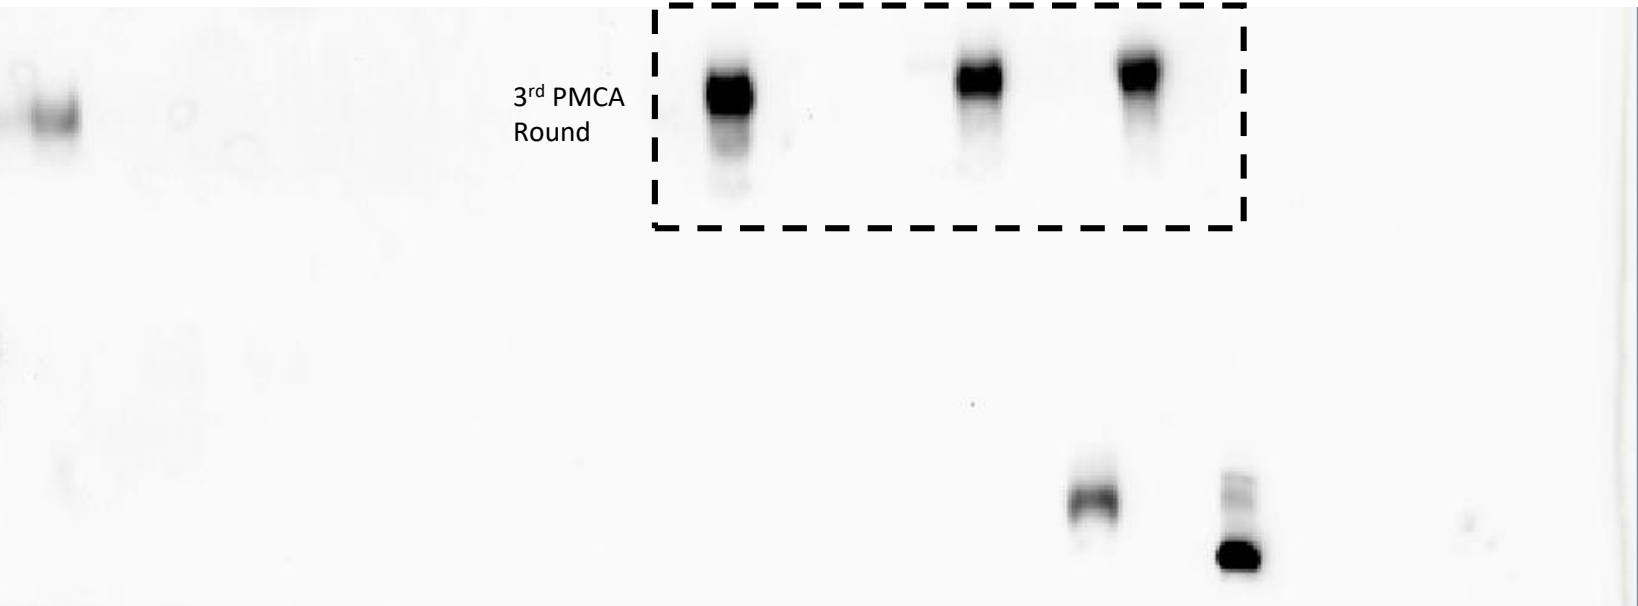

Figure 1

Semen

---

Neg B+ LN+ Neg Neg Neg Neg B+ LN+ B- LN+ B- LN+ B+ LN+ B+ LN+      B- LN+ Neg Neg Neg Neg Neg Neg B- LN+ B+ LN+ Neg

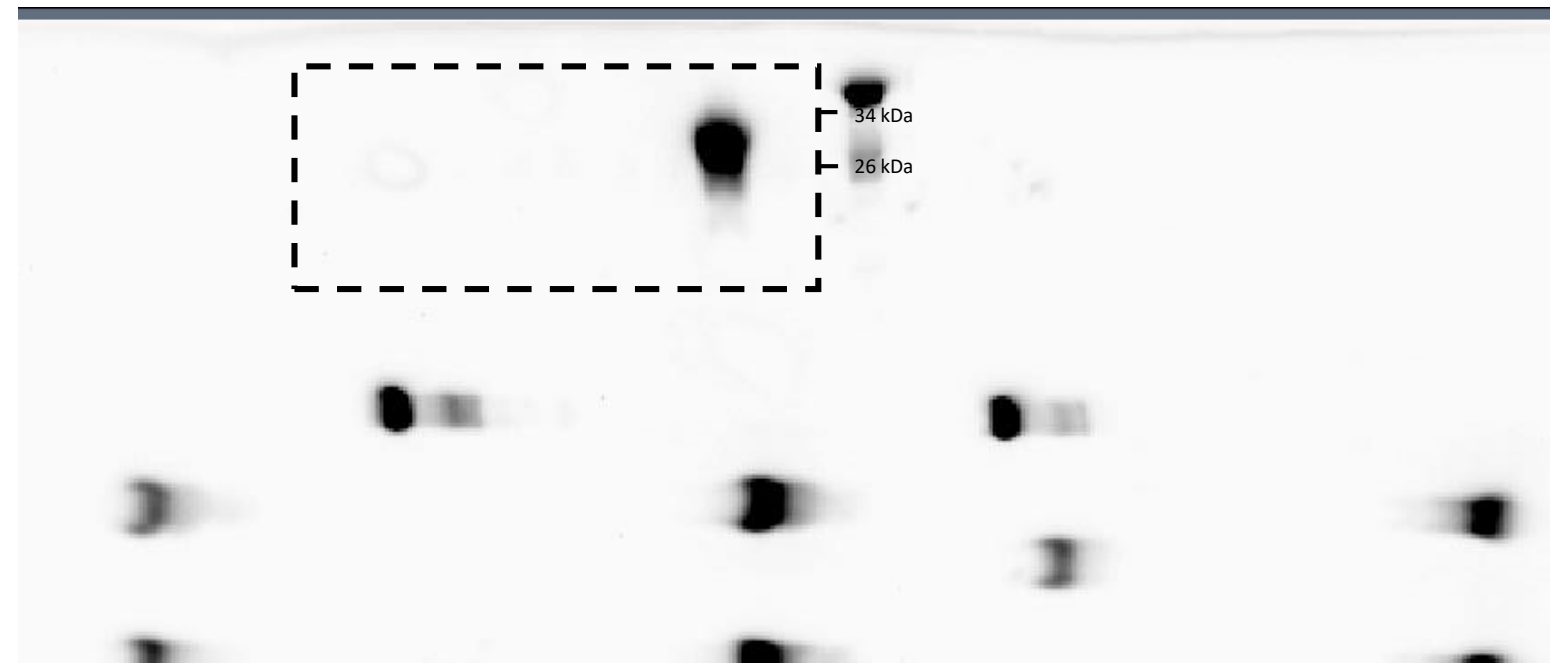

Figure 1

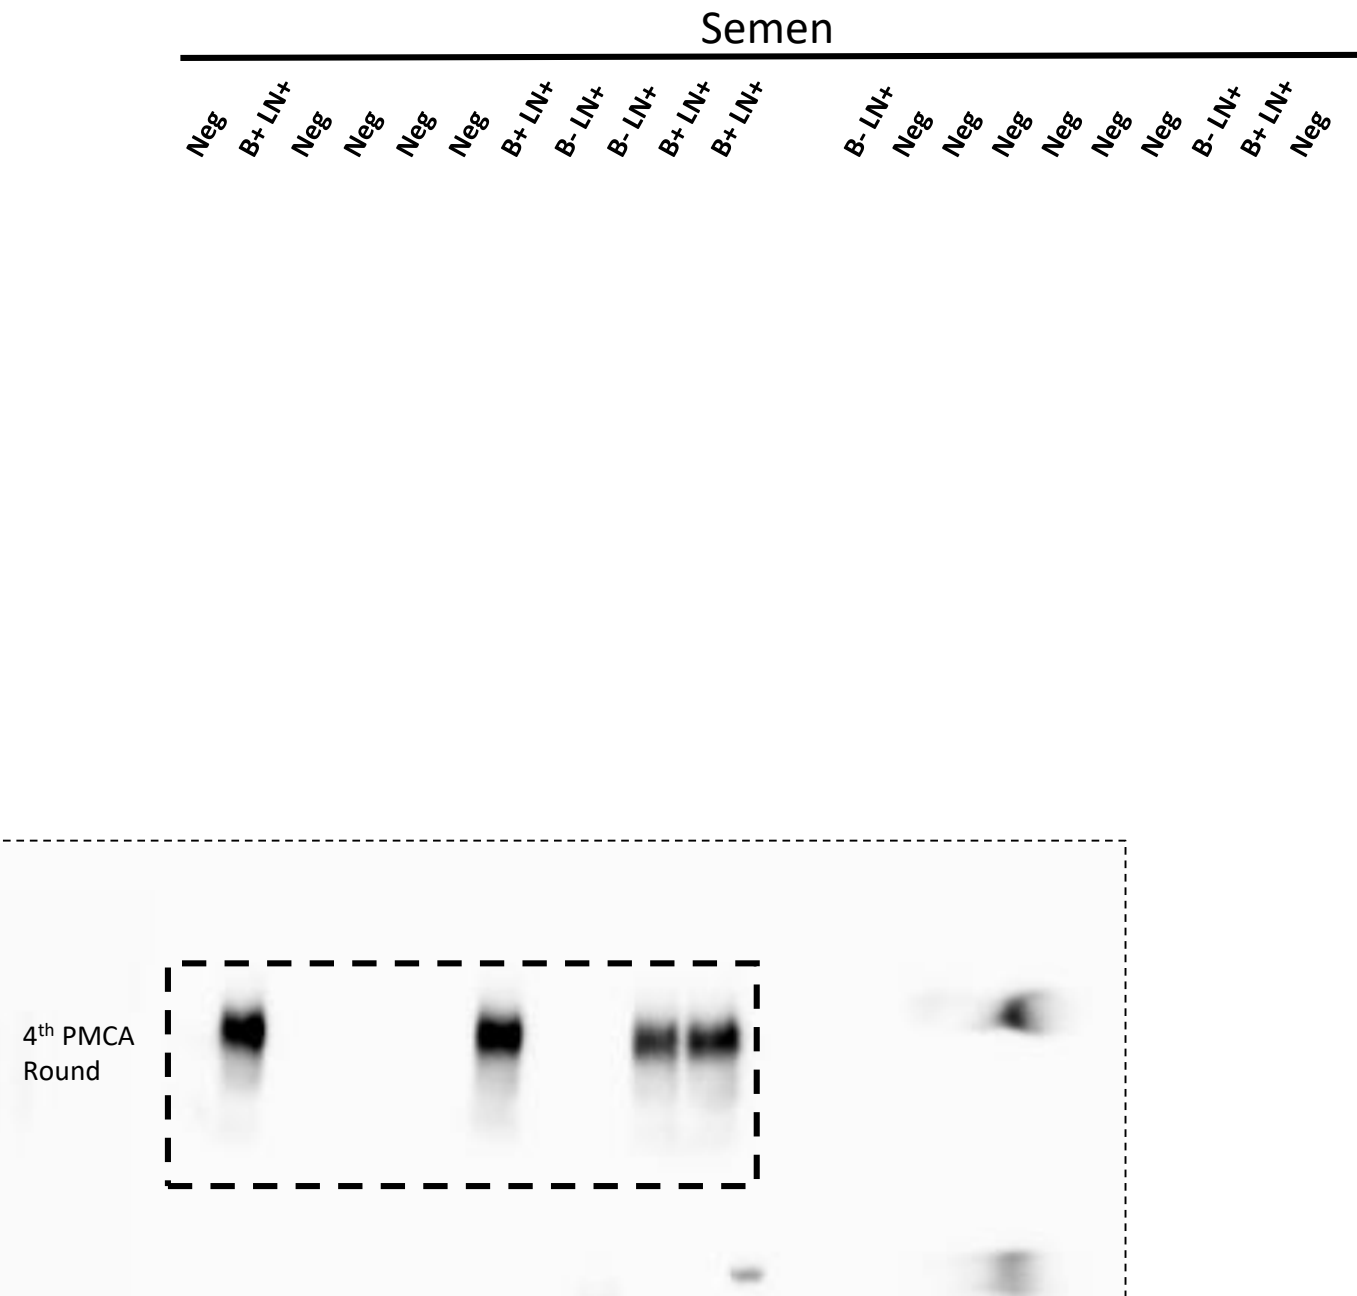

Figure 1

Semen

---

Neg B+ LN+ Neg Neg Neg Neg B+ LN+ B- LN+ B- LN+ B+ LN+ B+ LN+ B- LN+ Neg Neg Neg Neg Neg Neg Neg B- LN+ B+ LN+ Neg

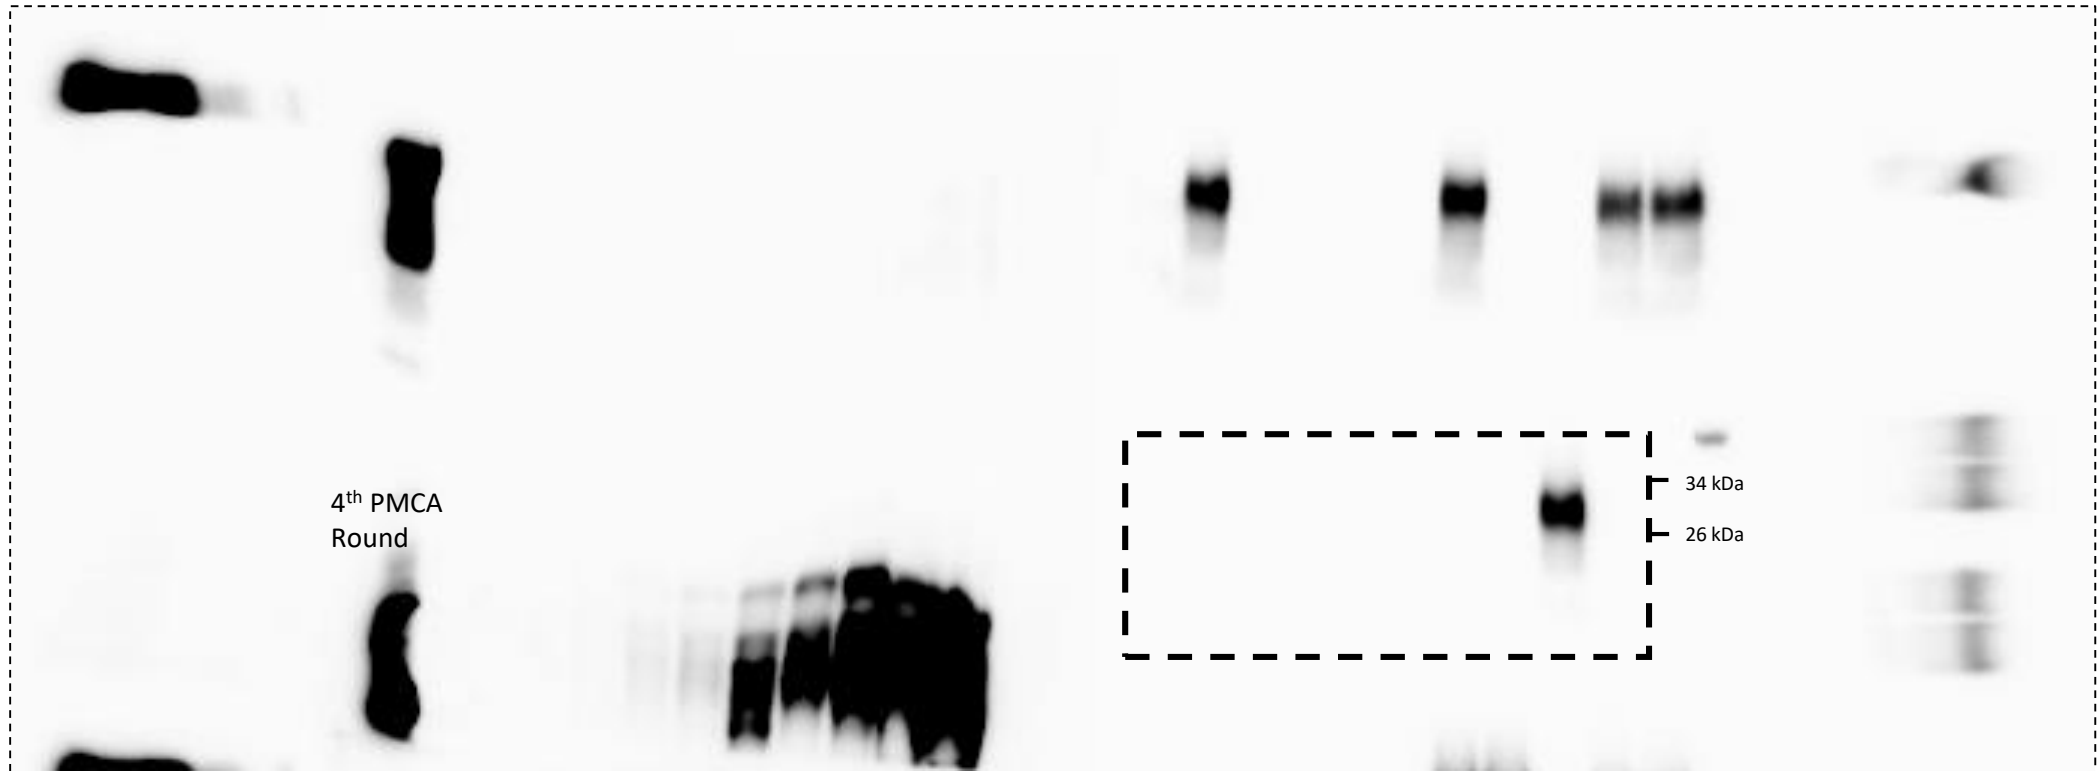



Figure 2

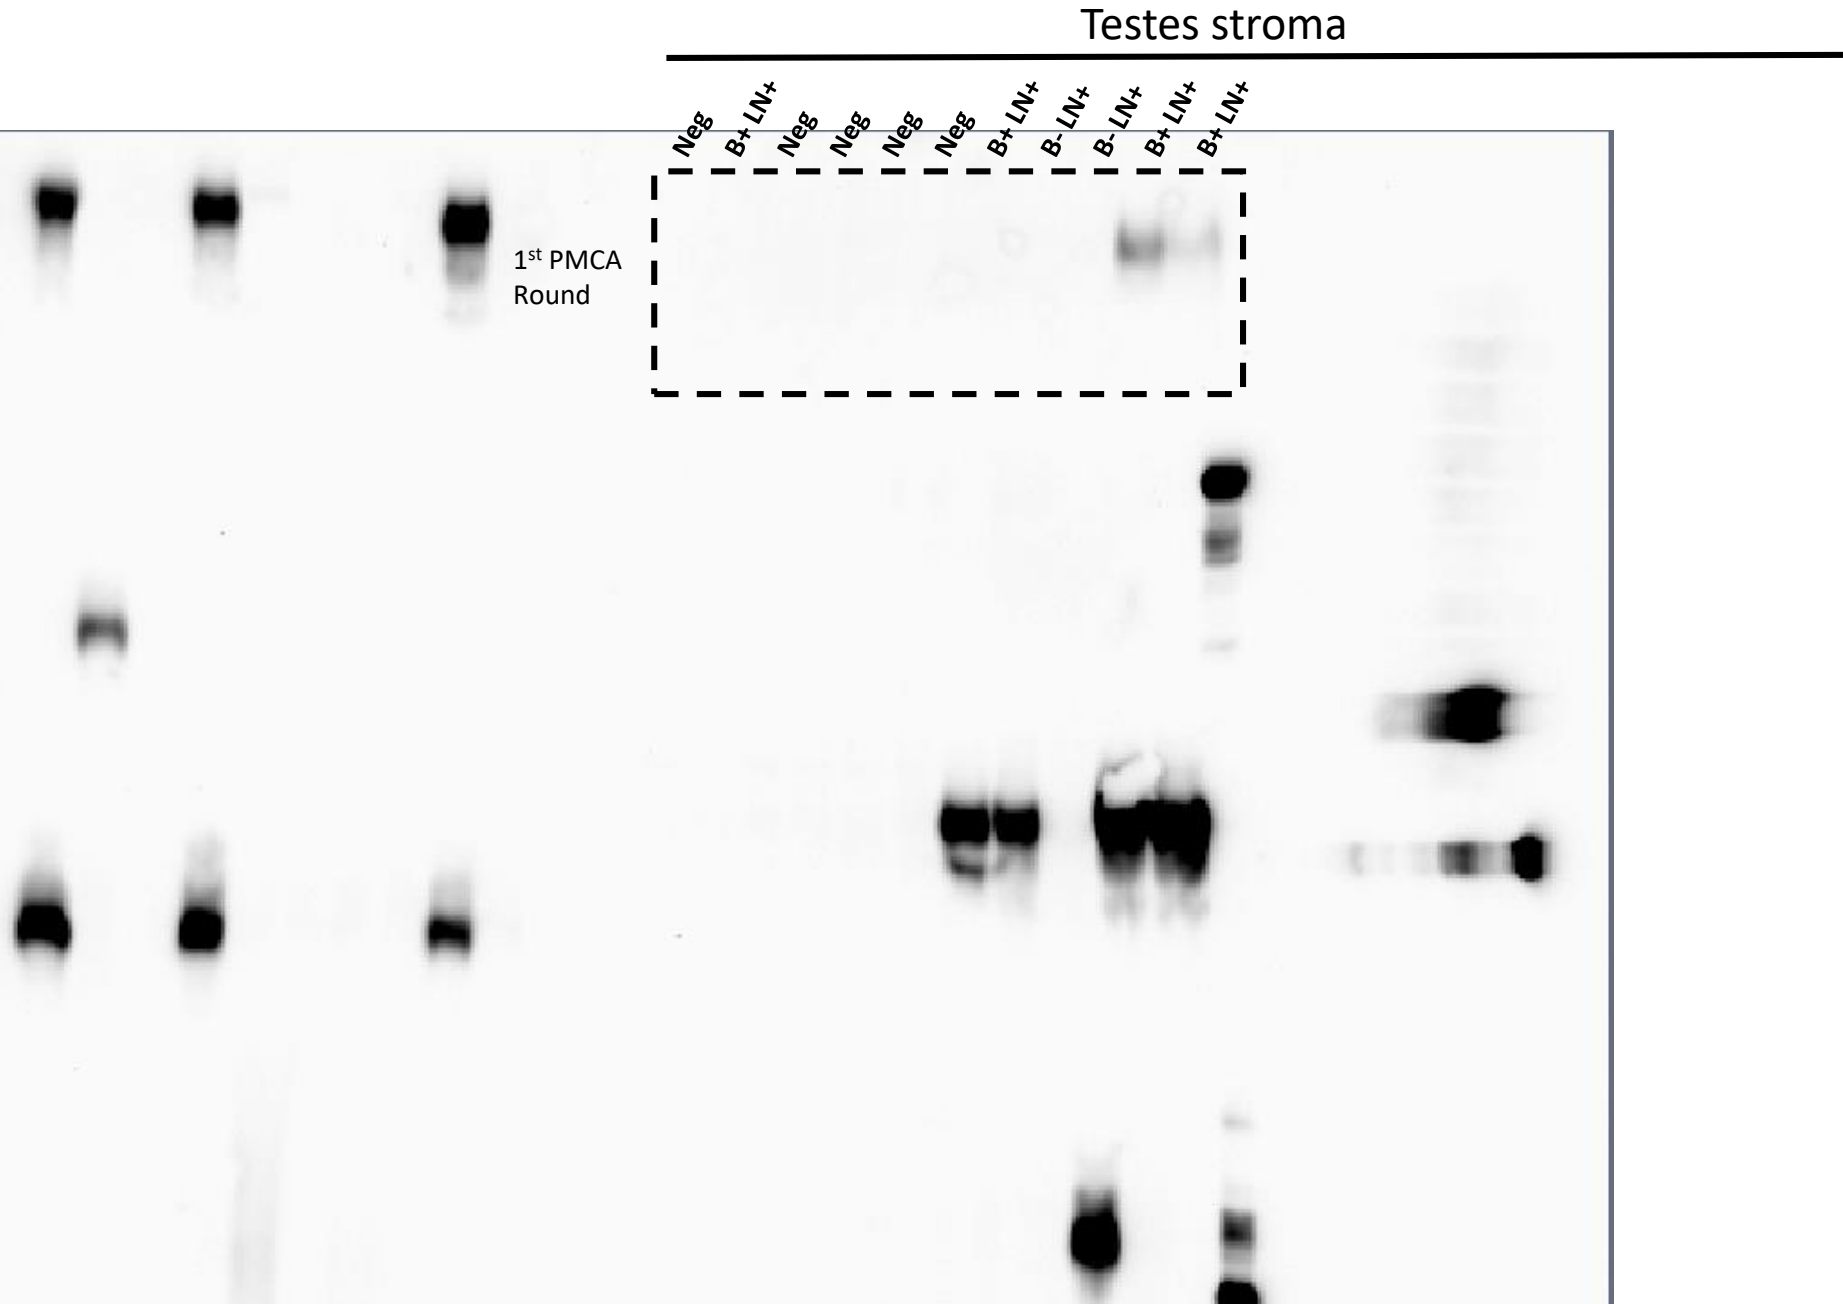

Figure 2

Testes stroma

Neg B+ LN+ Neg Neg Neg Neg B+ LN+ B- LN+ B- LN+ B+ LN+ B+ LN+ B- LN+ Neg Neg Neg Neg Neg Neg Neg B- LN+ B+ LN+ Neg

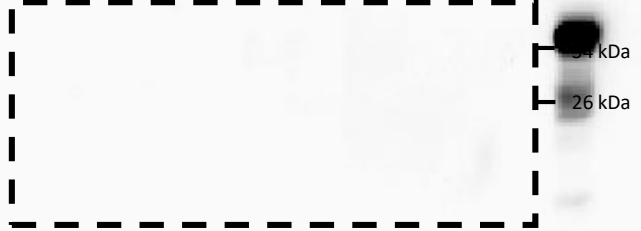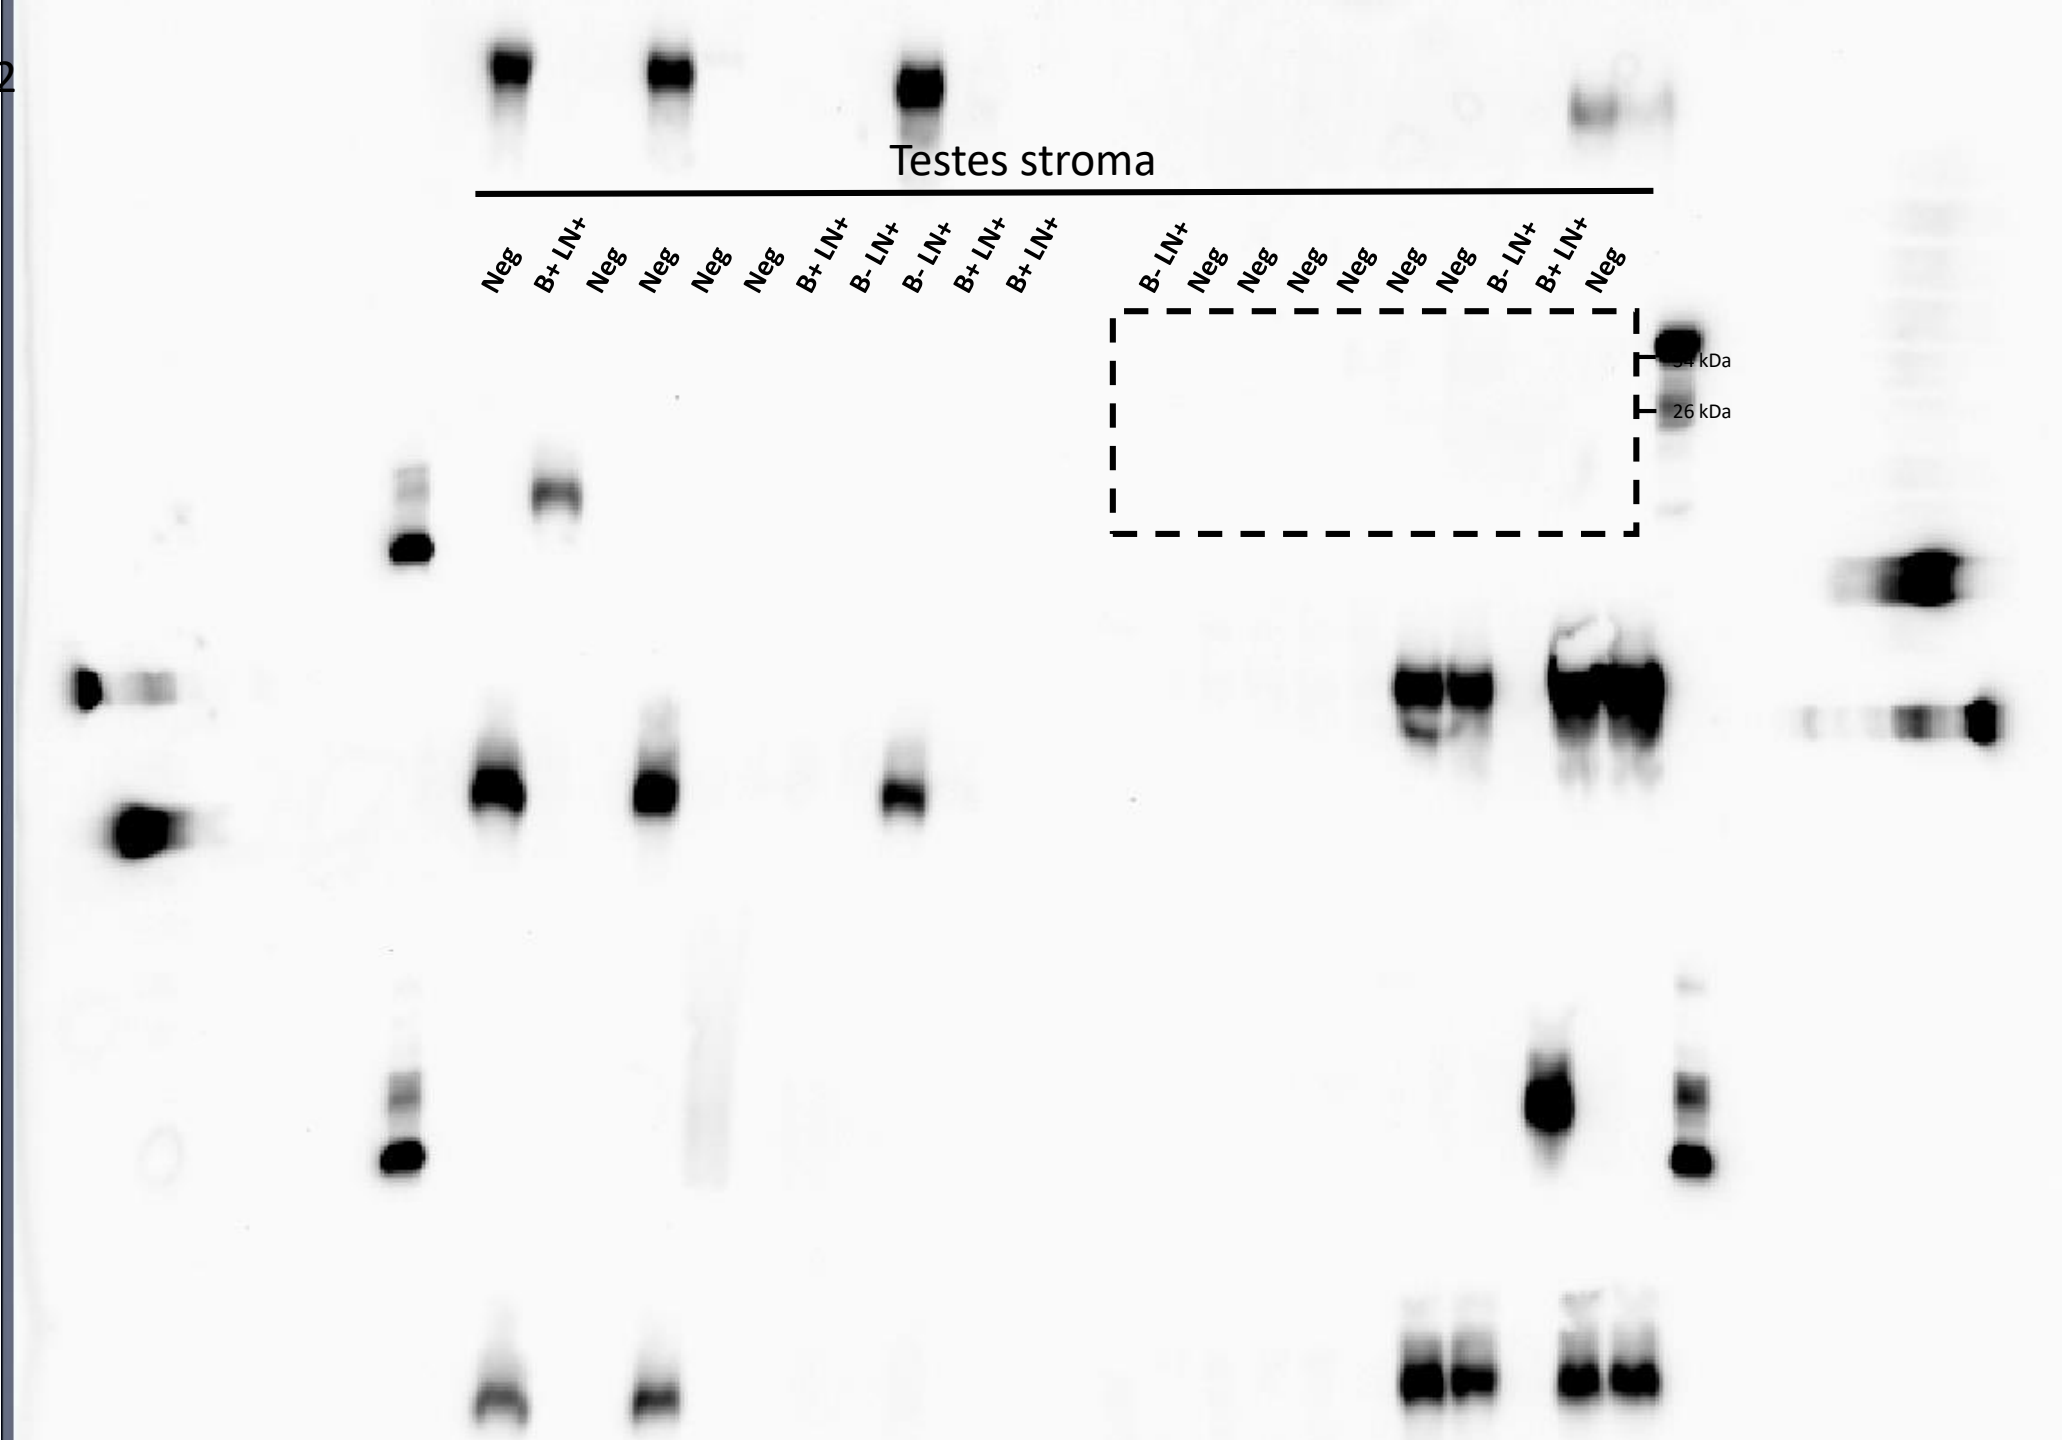

Figure 2

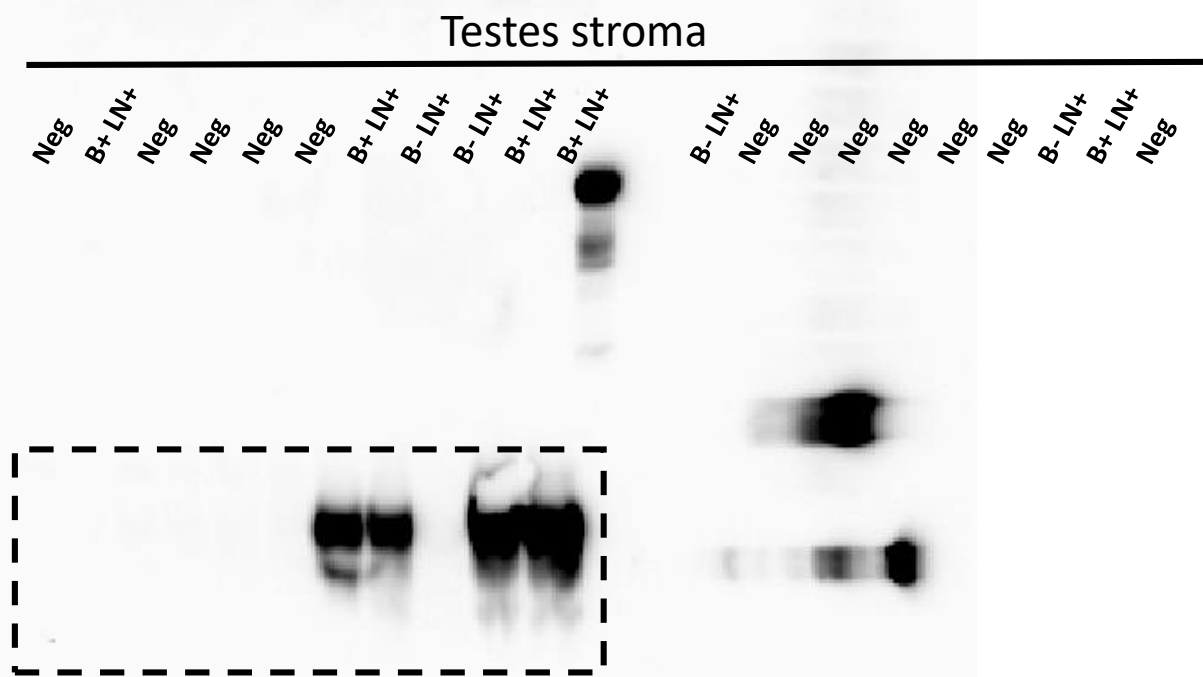

Figure 2

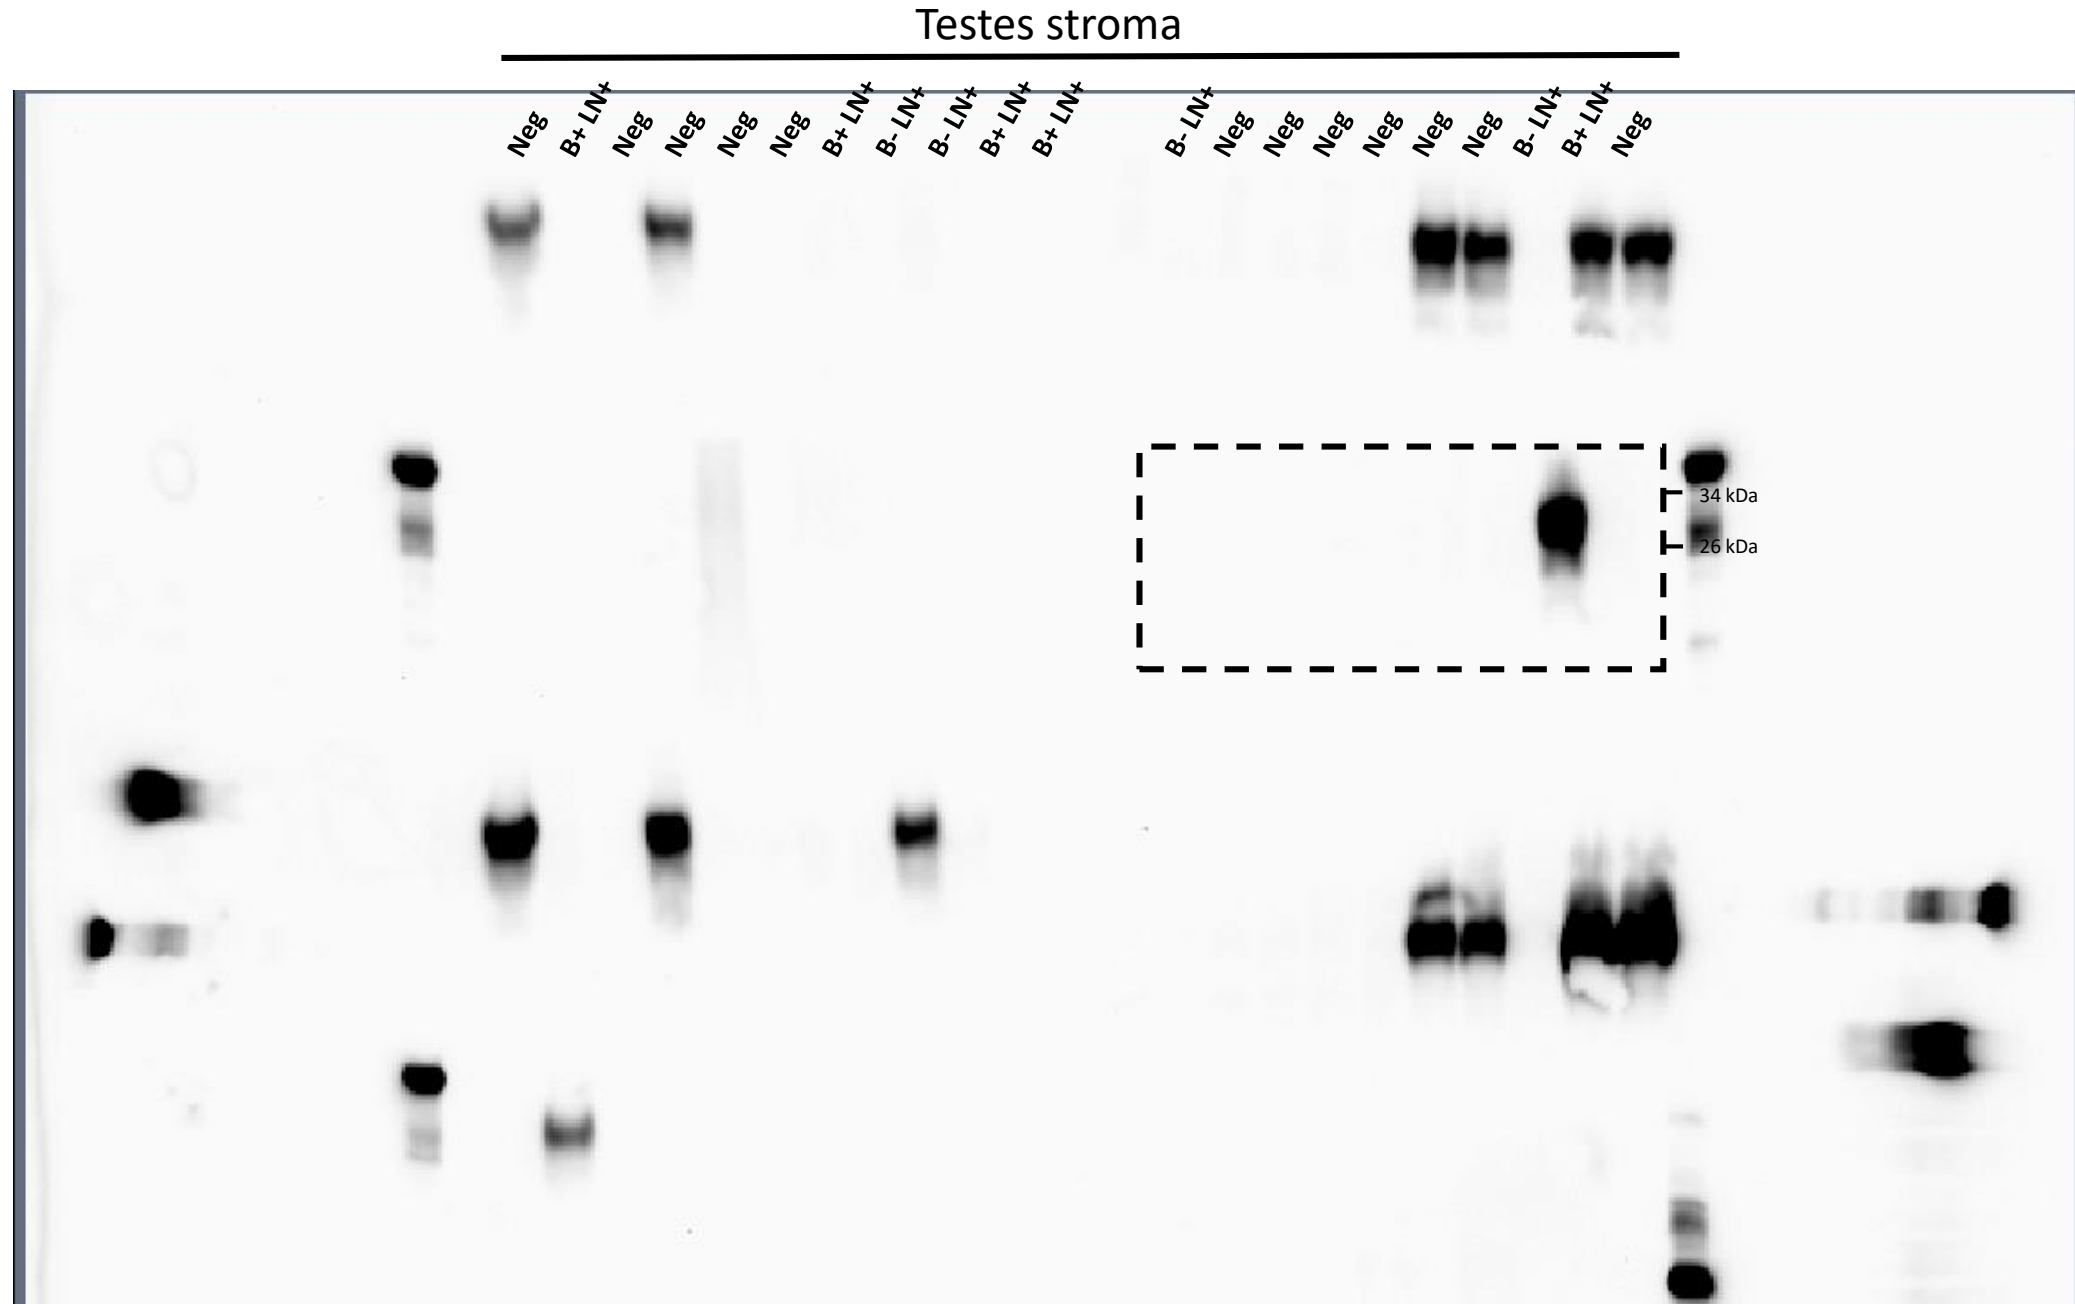

Figure 2

Testes stroma

---

Neg B+ LN+ Neg Neg Neg Neg B+ LN+ B- LN+ B- LN+ B+ LN+ B+ LN+ B- LN+ Neg Neg Neg Neg Neg Neg Neg B- LN+ B+ LN+ Neg

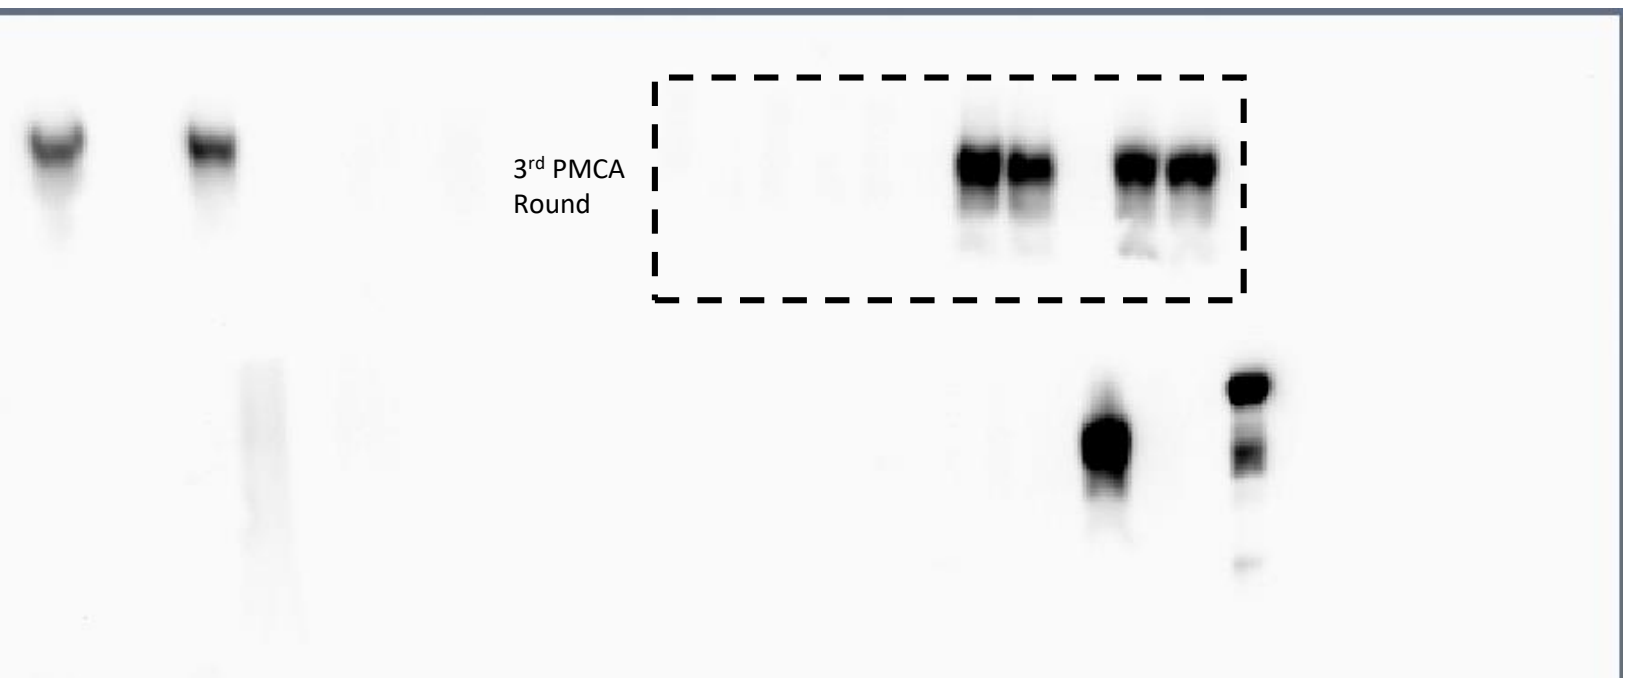

Figure 2

Testes stroma

---

Neg B+ LN+ Neg Neg Neg Neg B+ LN+ B- LN+ B- LN+ B+ LN+ B+ LN+ B- LN+ Neg Neg Neg Neg Neg Neg B- LN+ B+ LN+ Neg

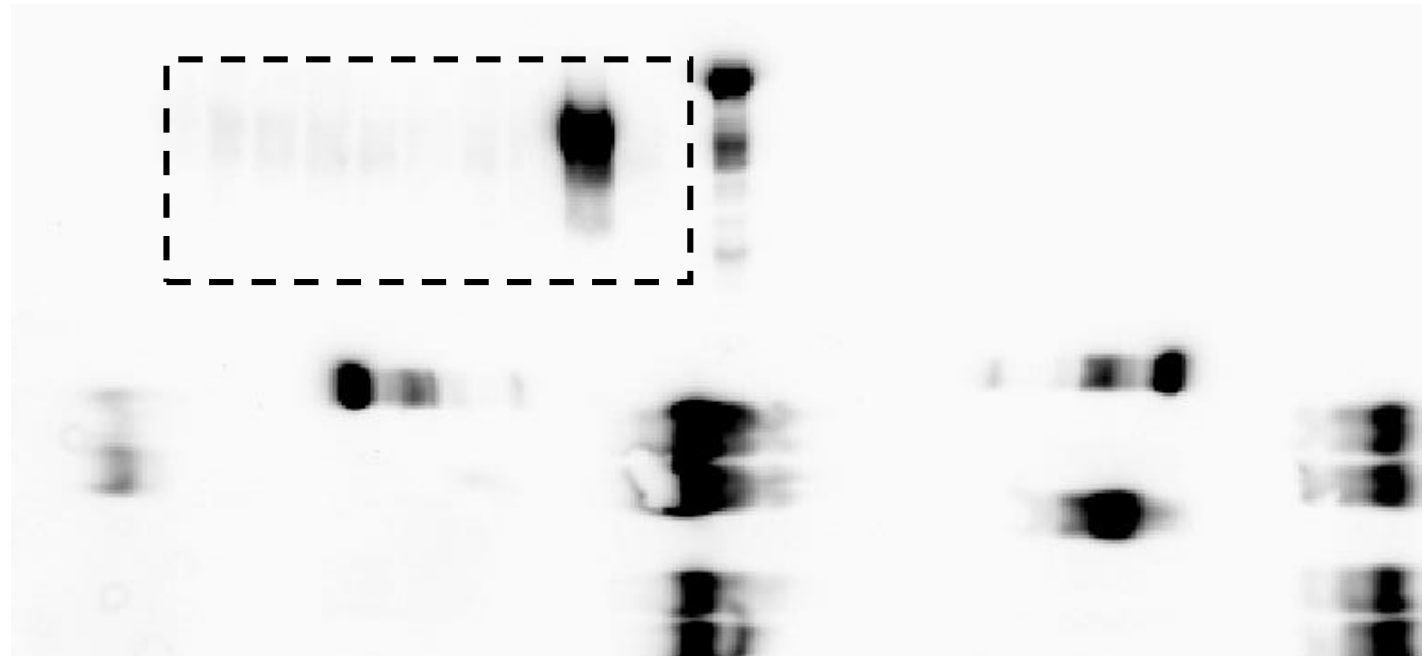

Figure 2

Testes stroma

---

Neg B+ LN+ Neg Neg Neg Neg B+ LN+ B- LN+ B- LN+ B+ LN+ B+ LN+ B- LN+ Neg Neg Neg Neg Neg Neg B- LN+ B+ LN+ Neg

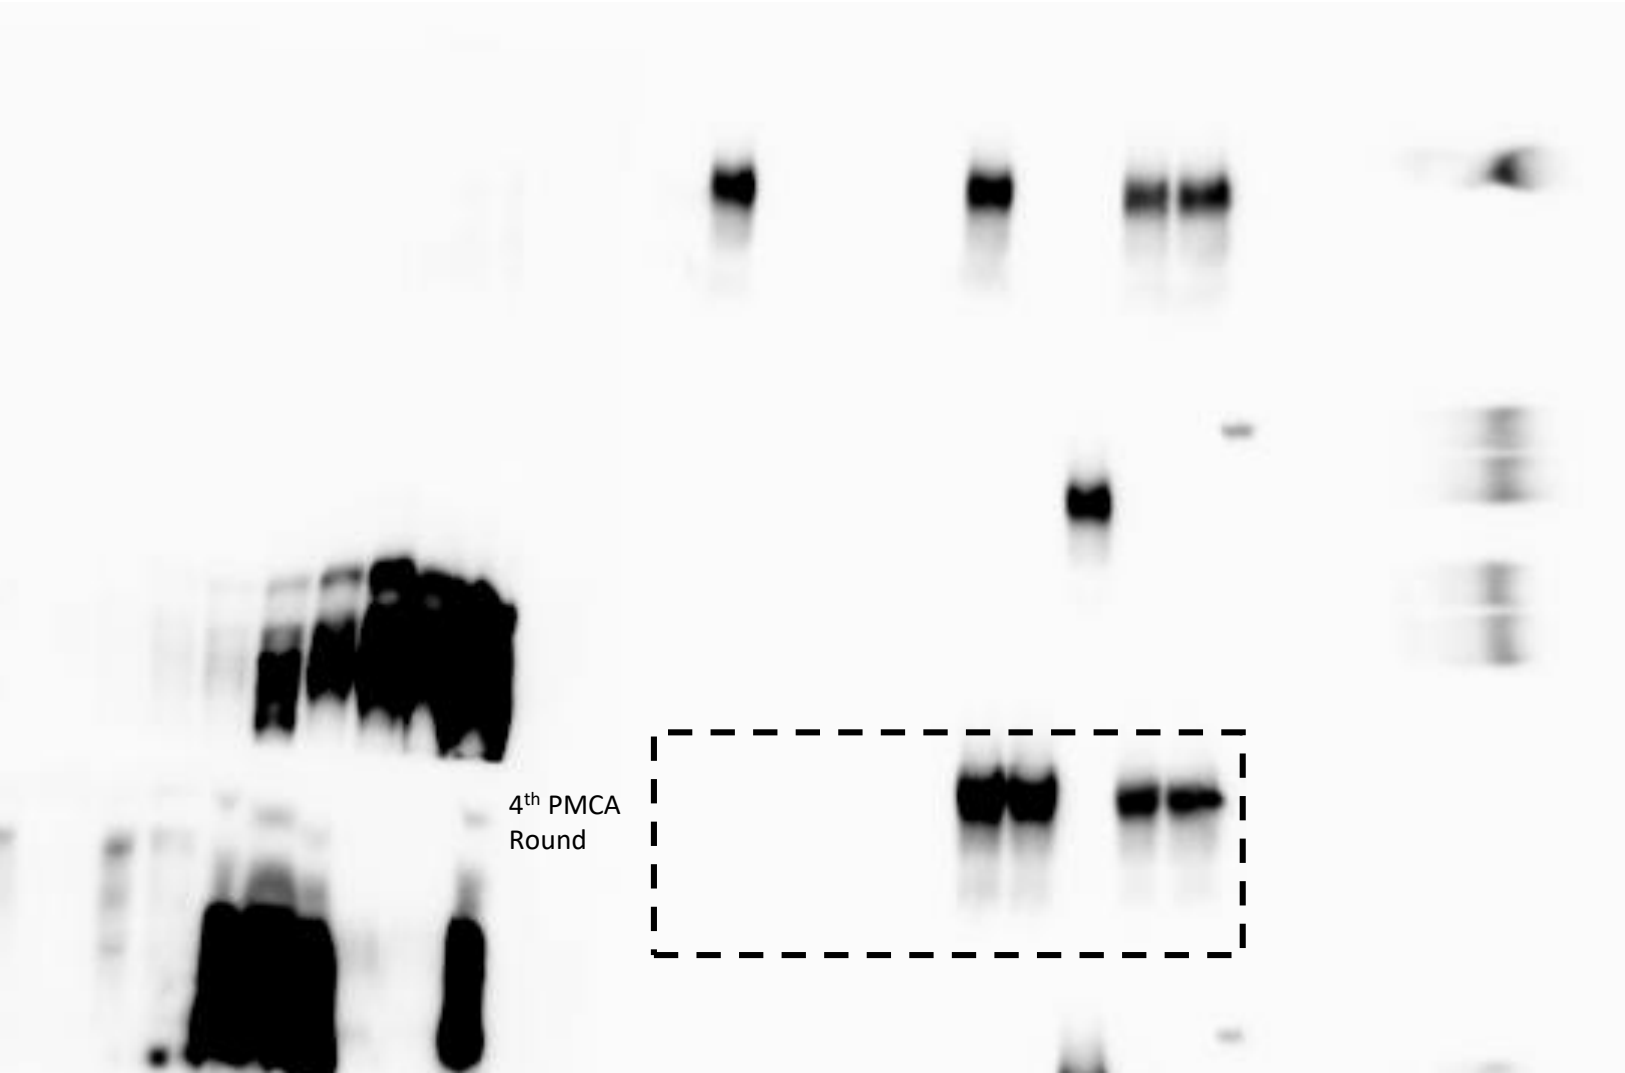

Figure 2

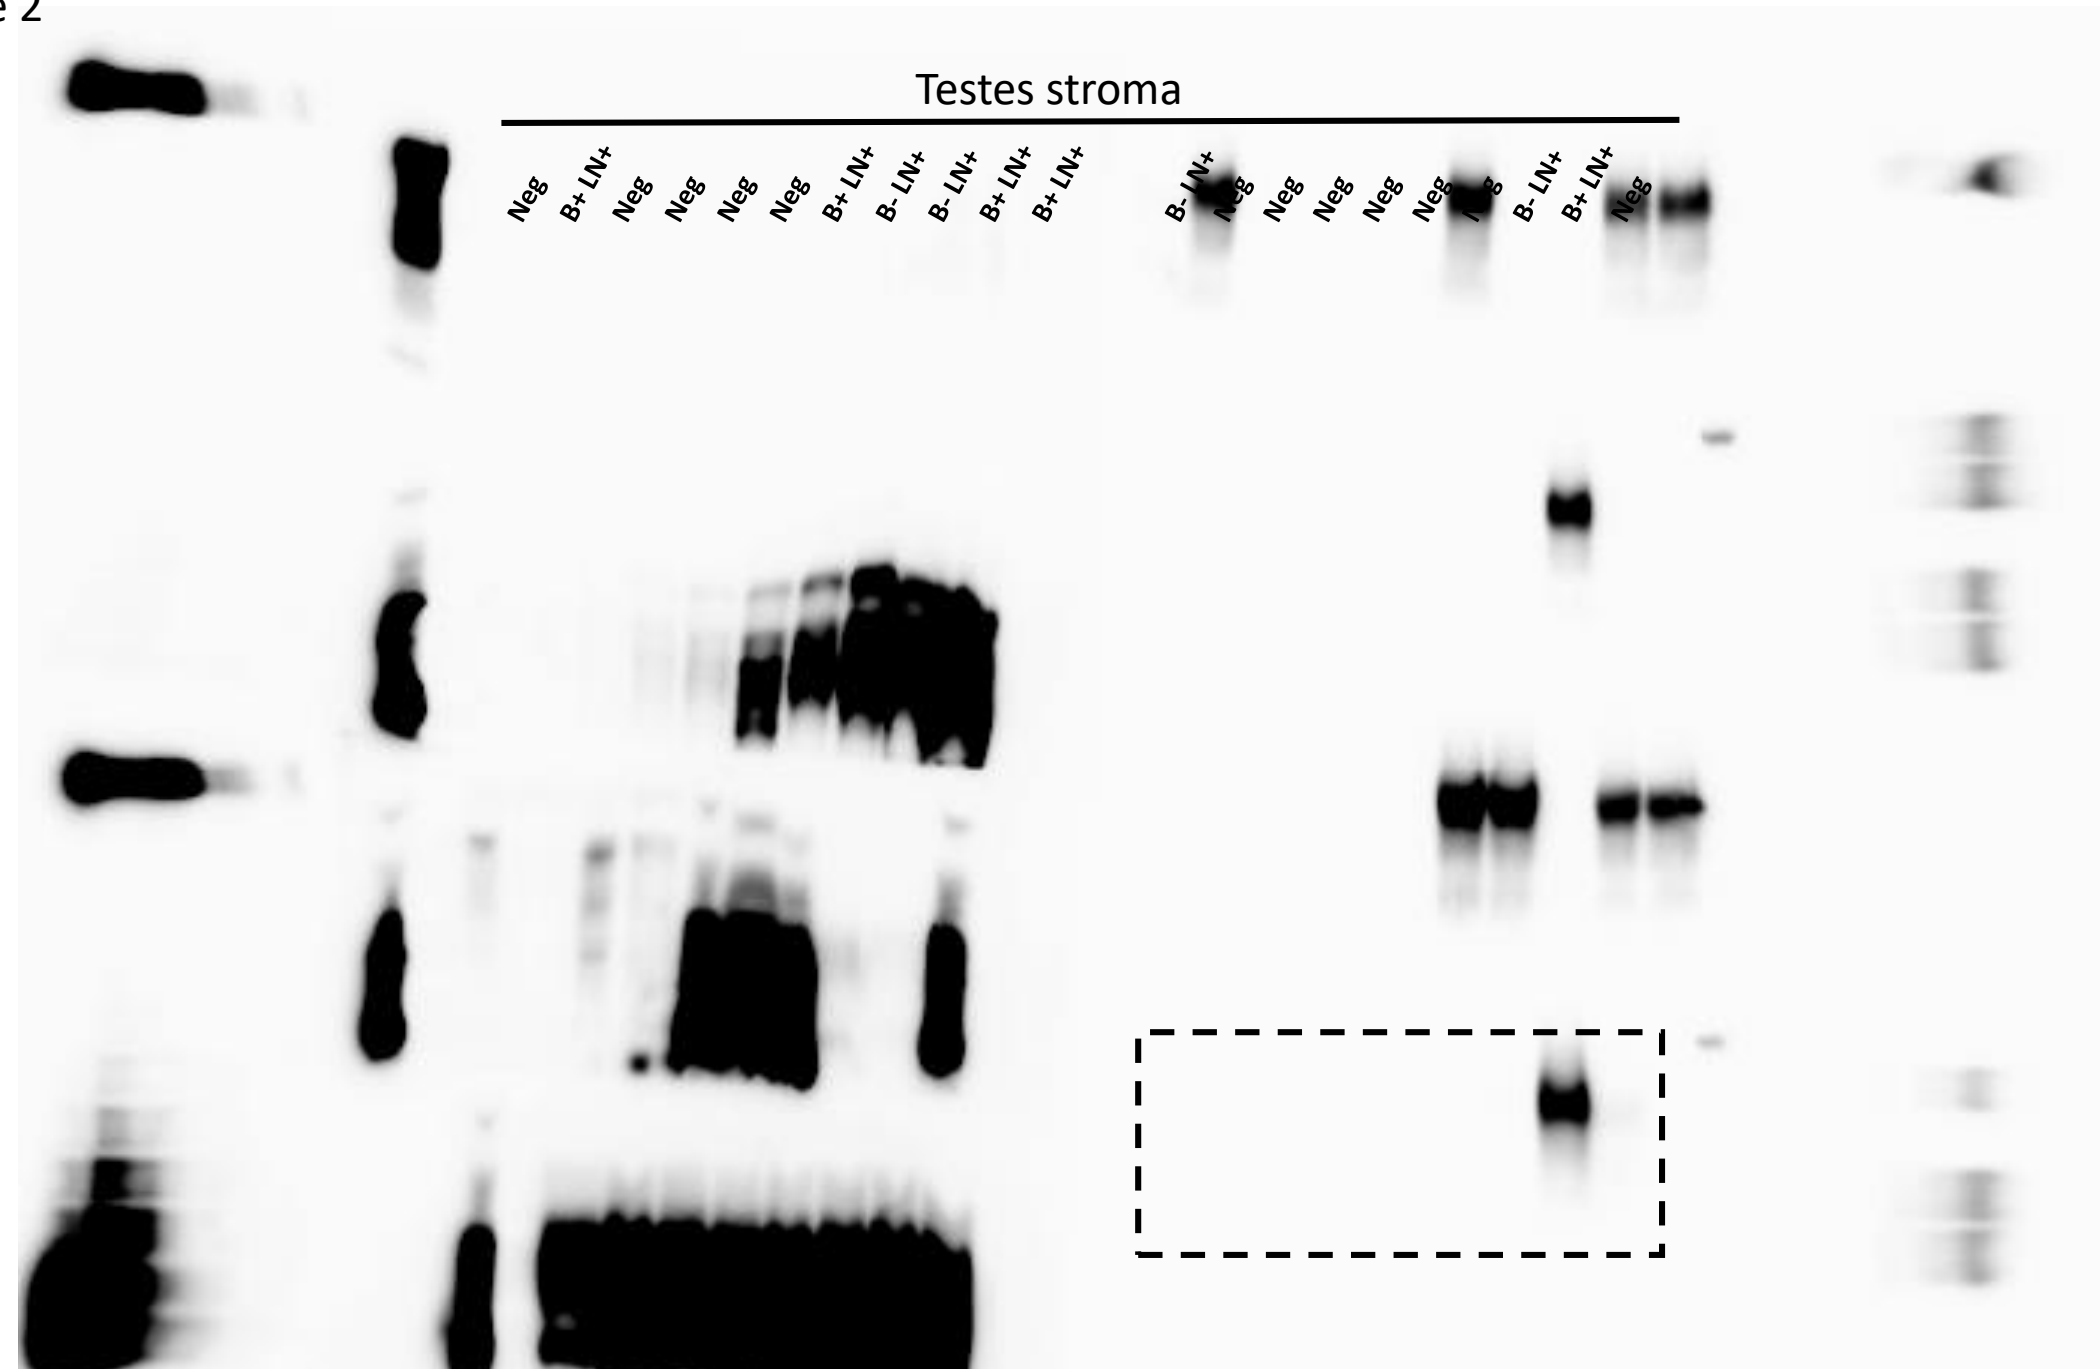



Figure 3

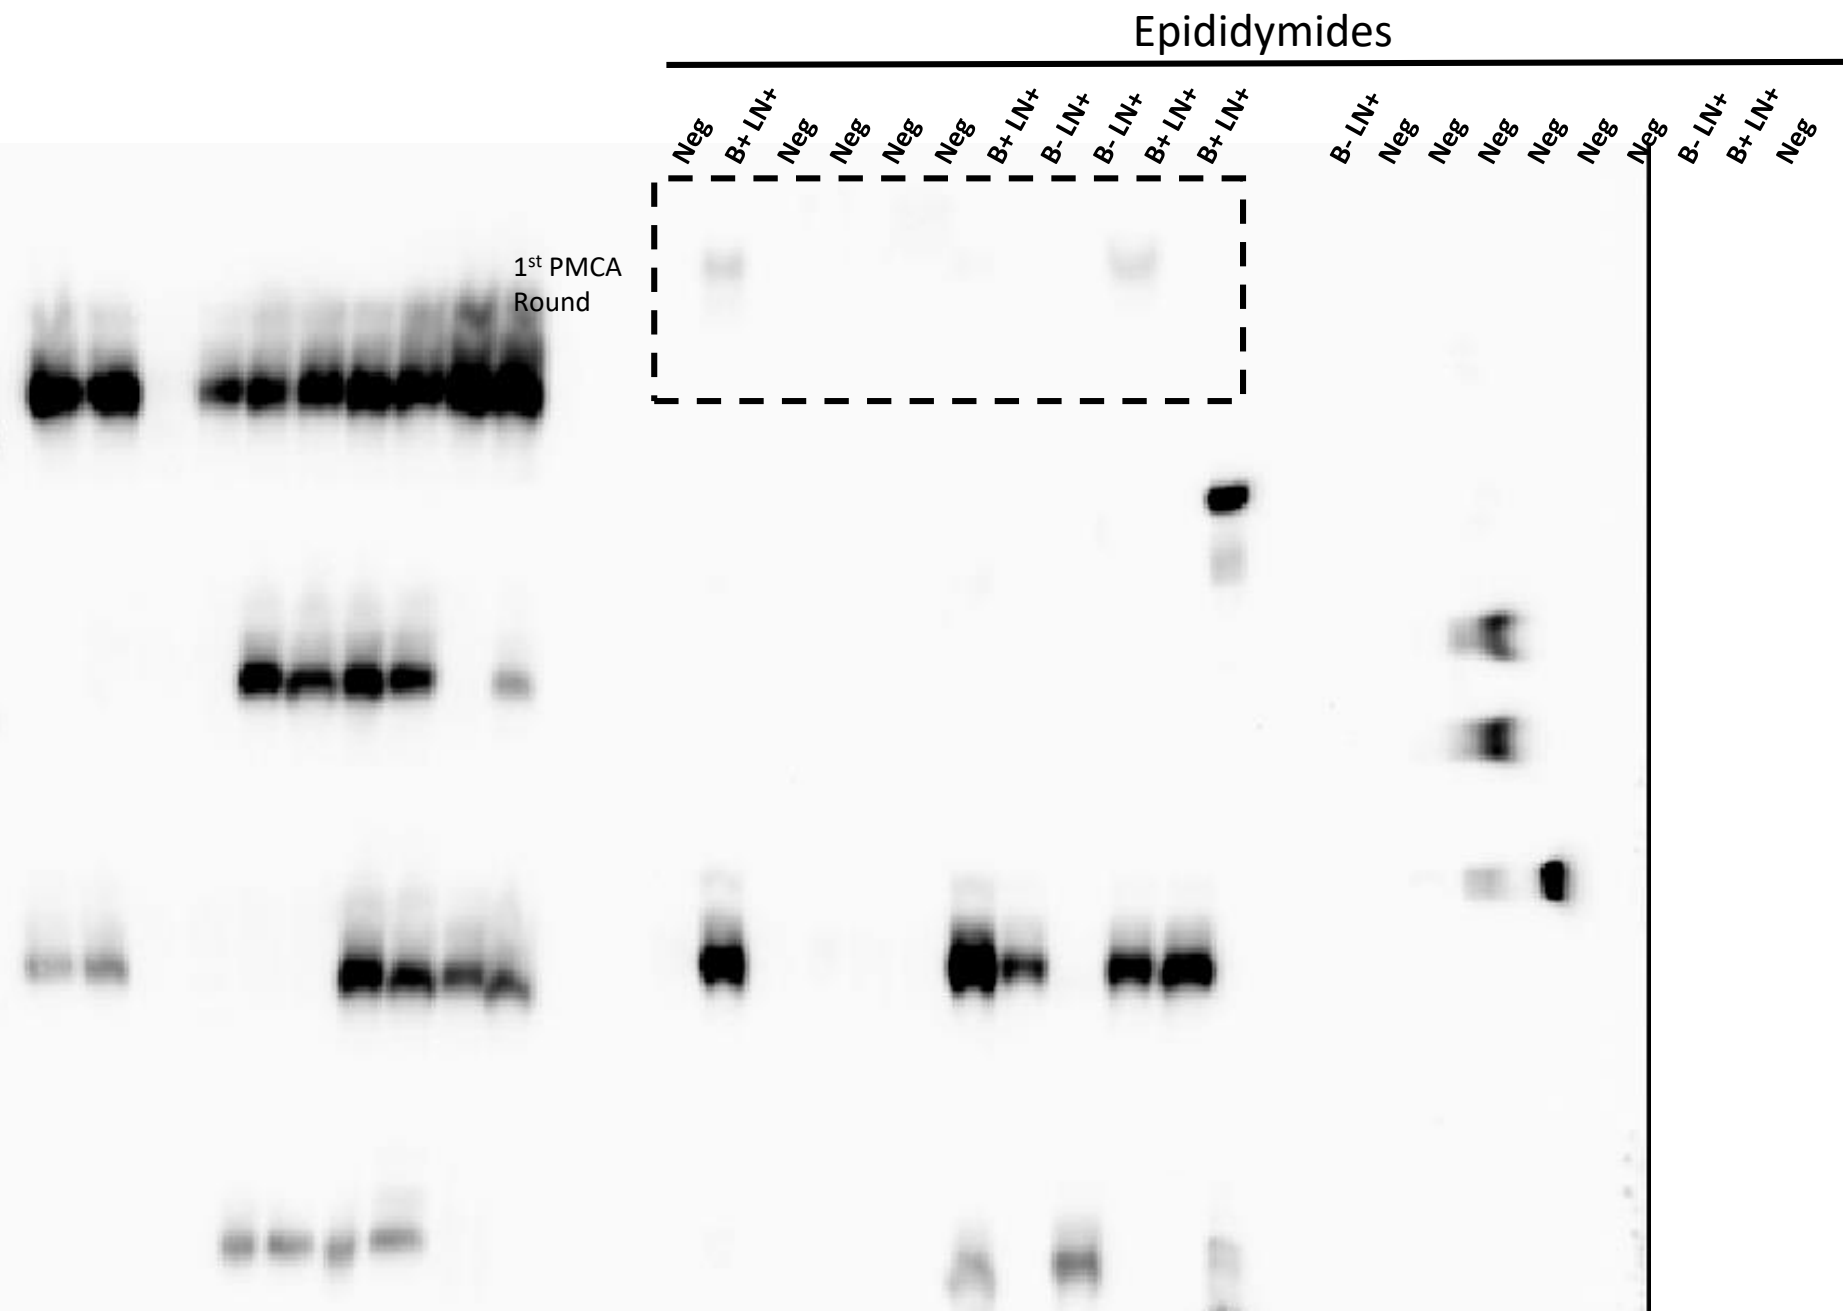

Figure 3

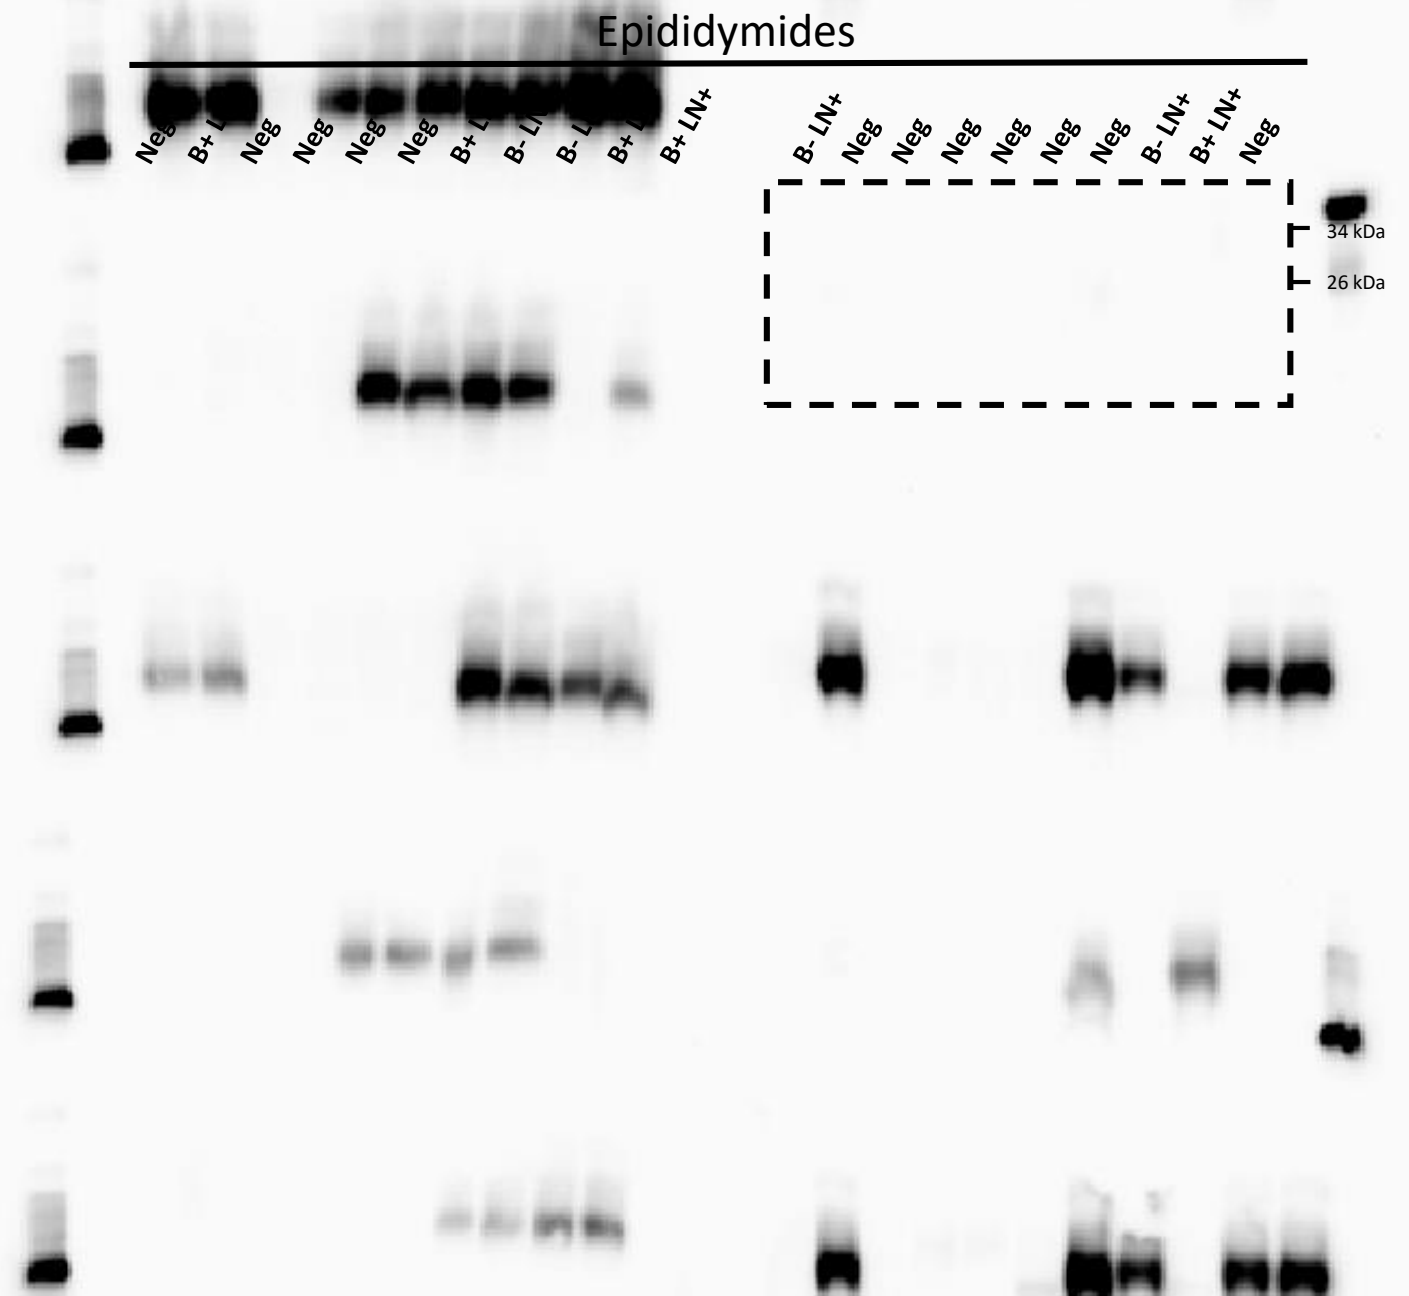

Figure 3

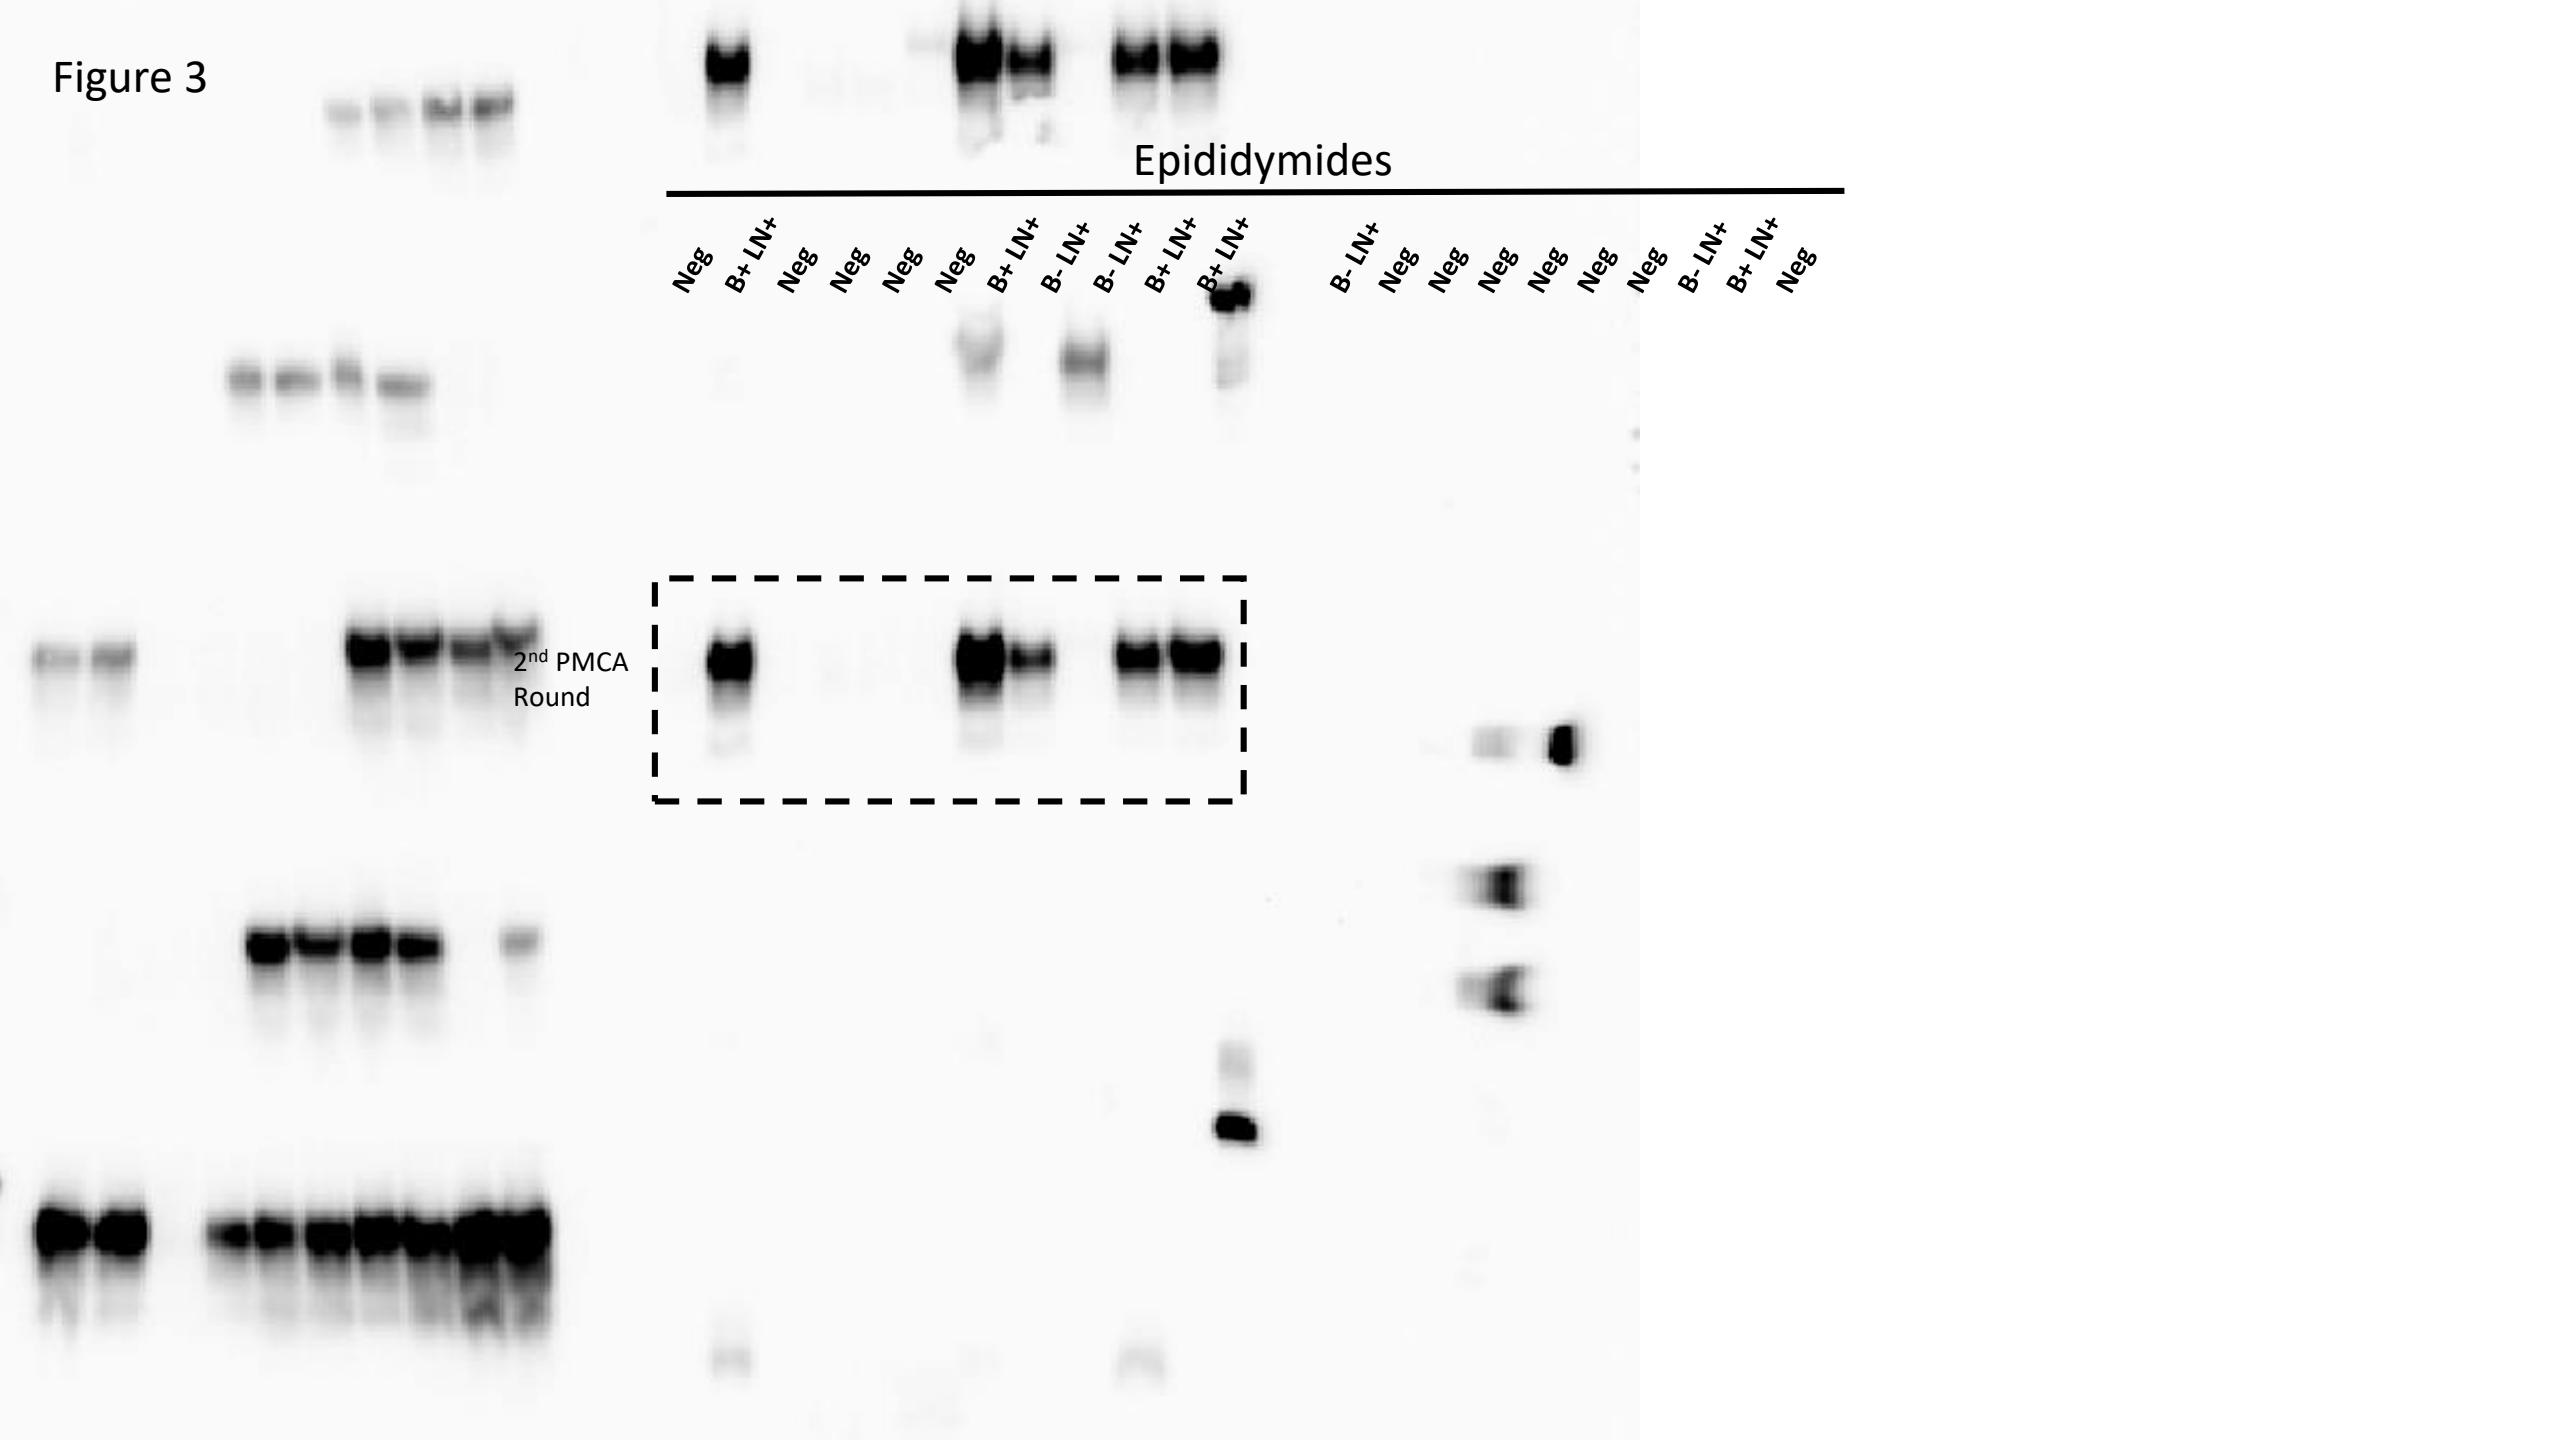

Figure 3

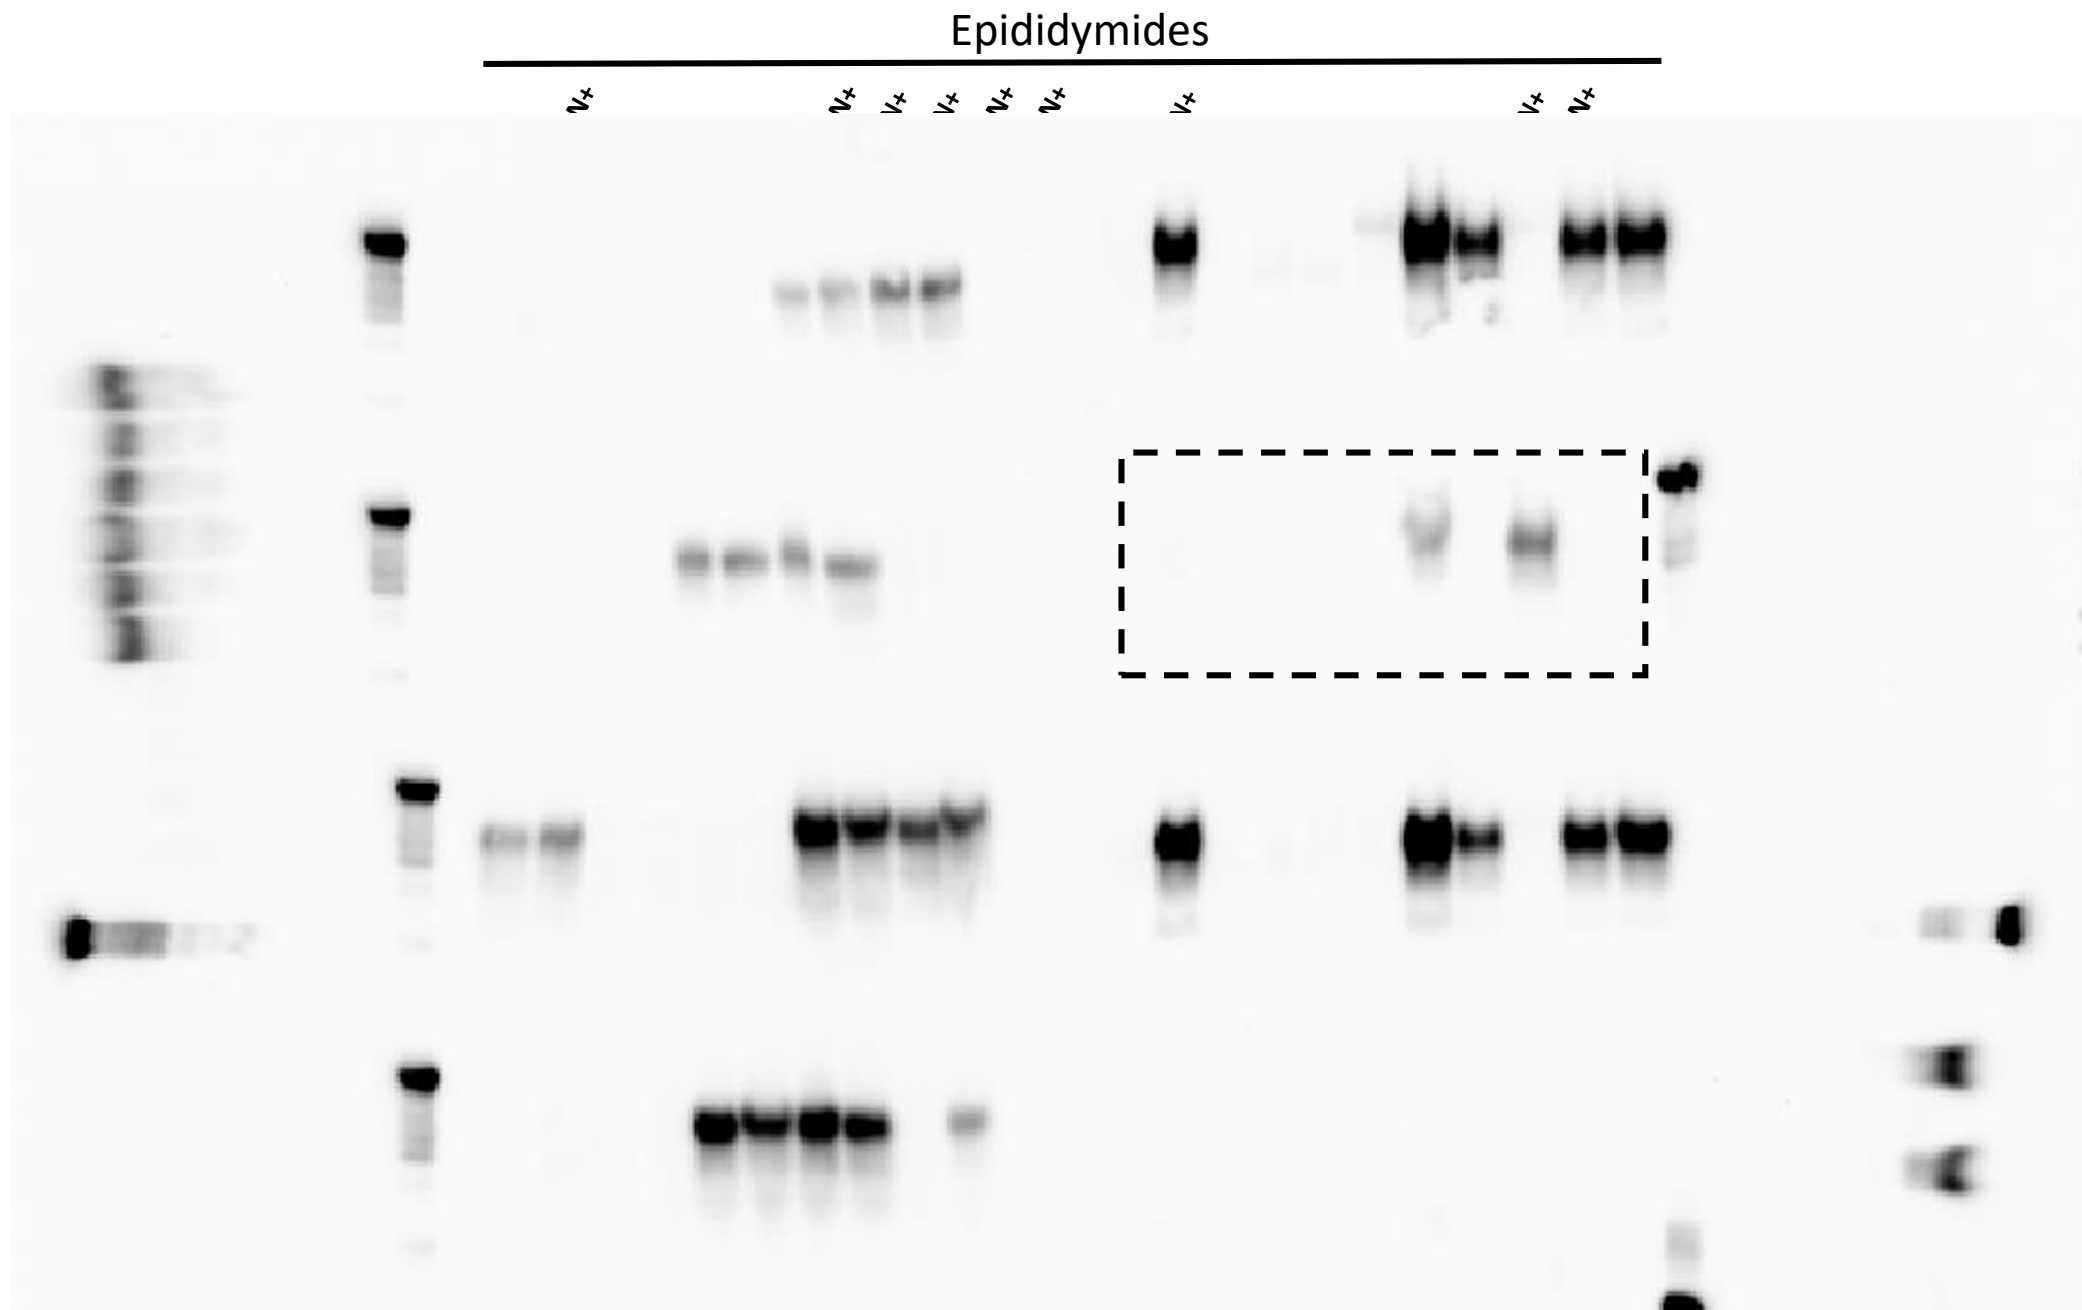

Figure 3

Epididymides

---

Neg B+ LN+ Neg Neg Neg Neg B+ LN+ B- LN+ B- LN+ B+ LN+ B+ LN+ B- LN+ Neg Neg Neg Neg Neg Neg Neg B- LN+ B+ LN+ Neg

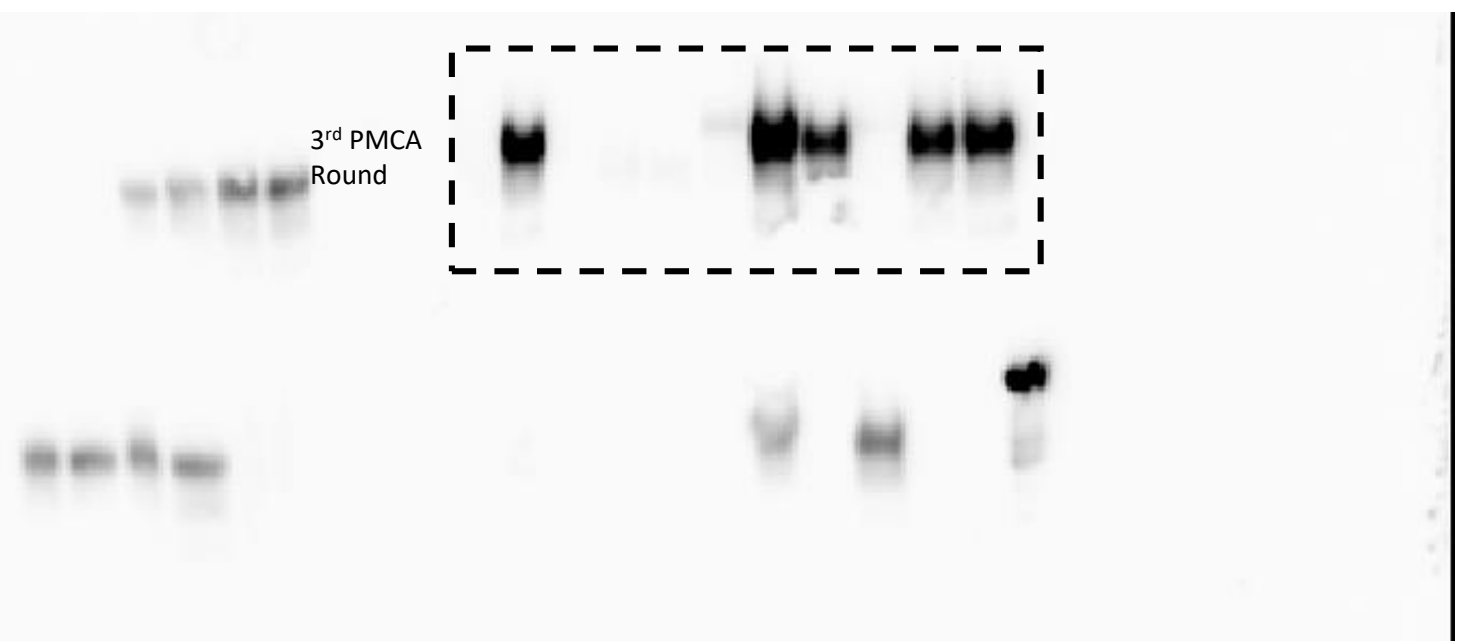

Figure 3

Epididymides

---

Neg B+ LN+ Neg Neg Neg Neg B+ LN+ B- LN+ B- LN+ B+ LN+ B+ LN+      B- LN+ Neg Neg Neg Neg Neg Neg B- LN+ B+ LN+ Neg

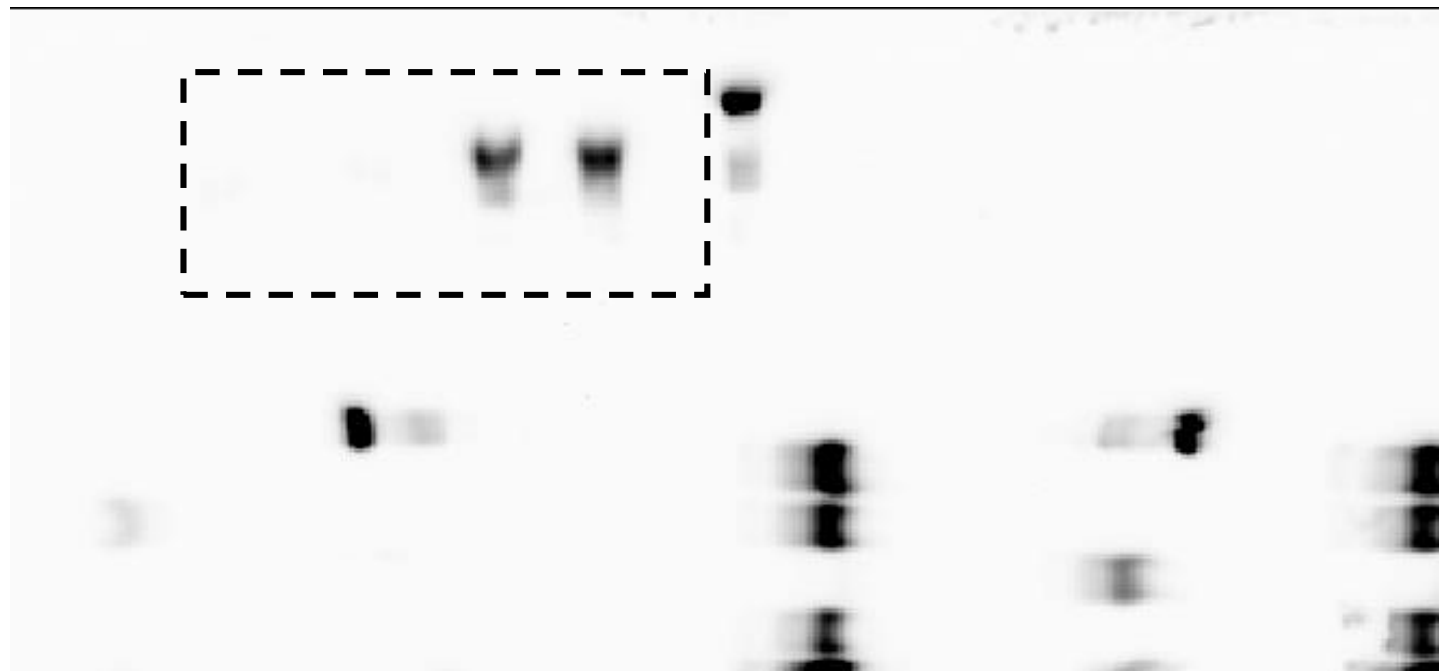

Figure 3

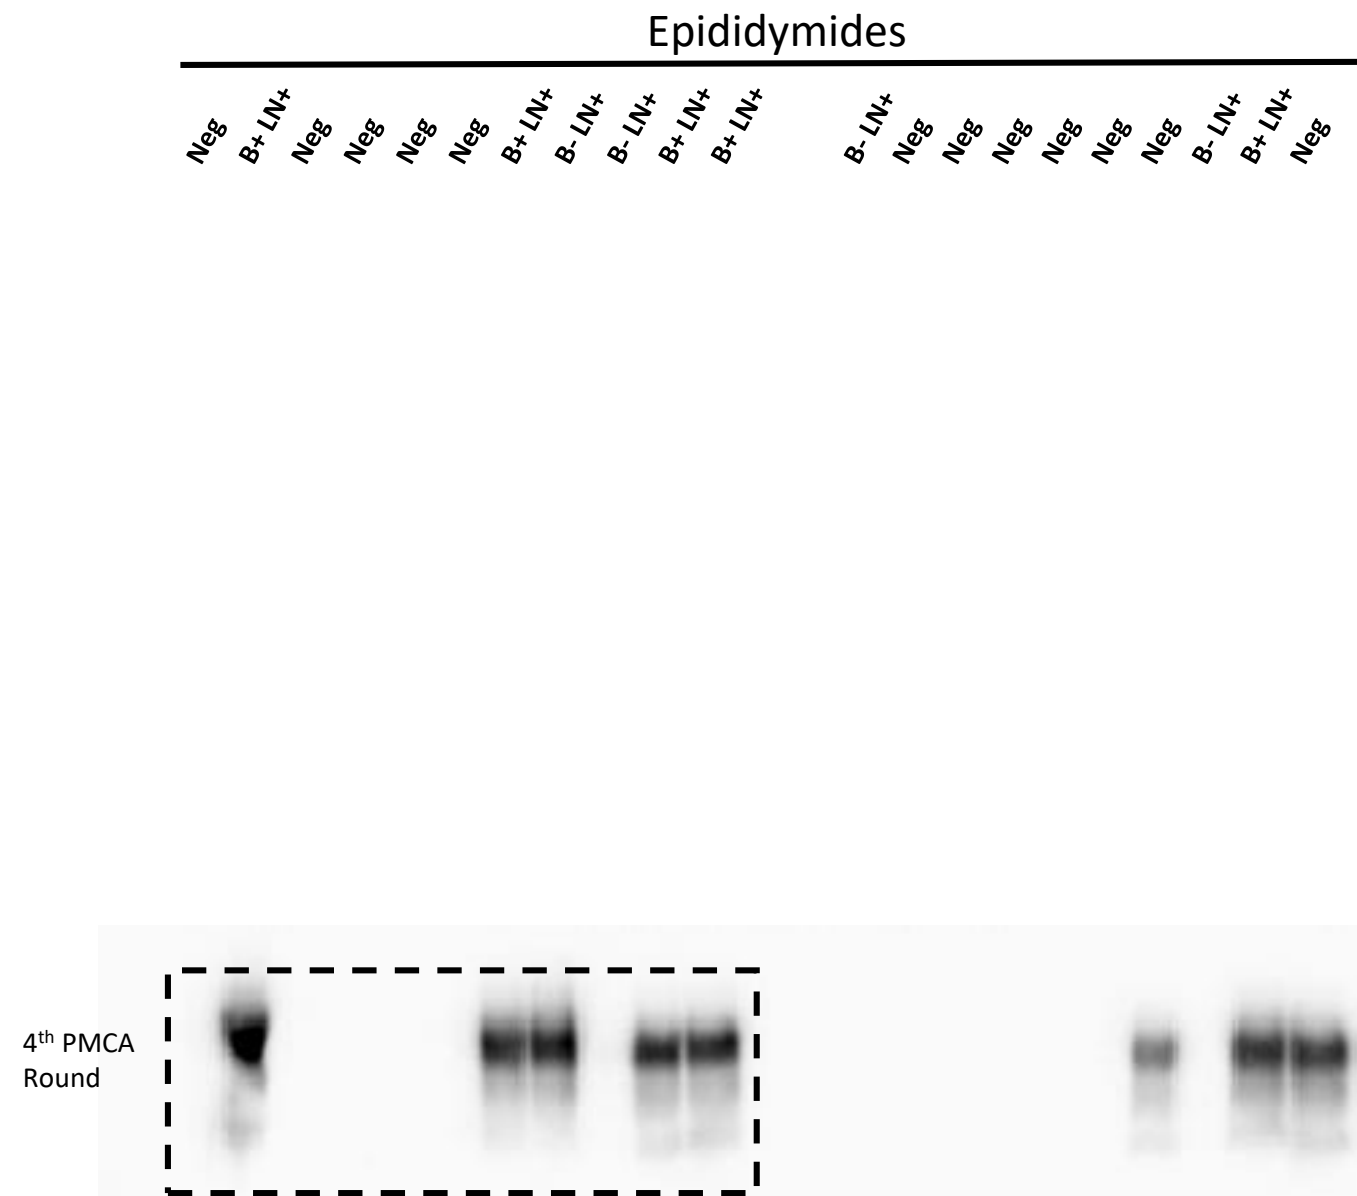

Figure 3

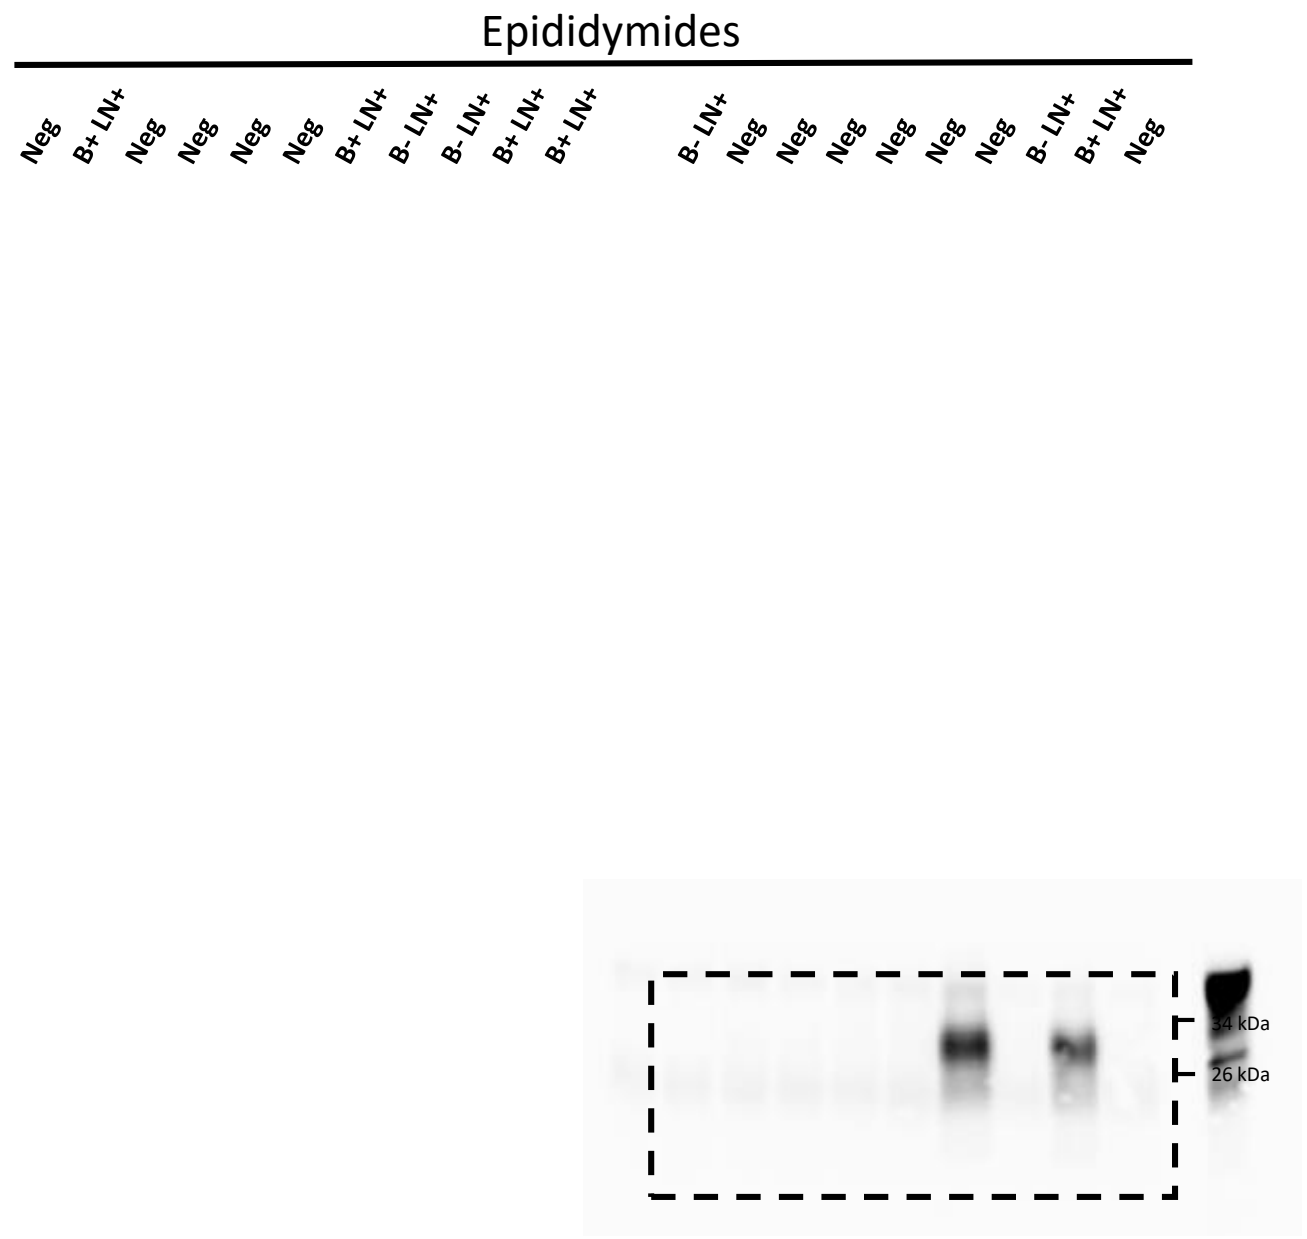



1<sup>st</sup> PMCA  
Round

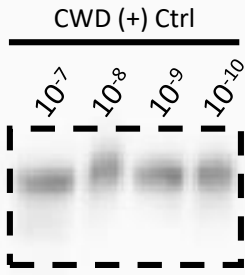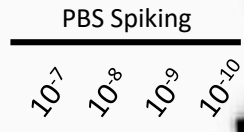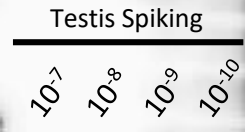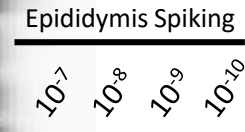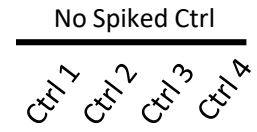

Figure 4

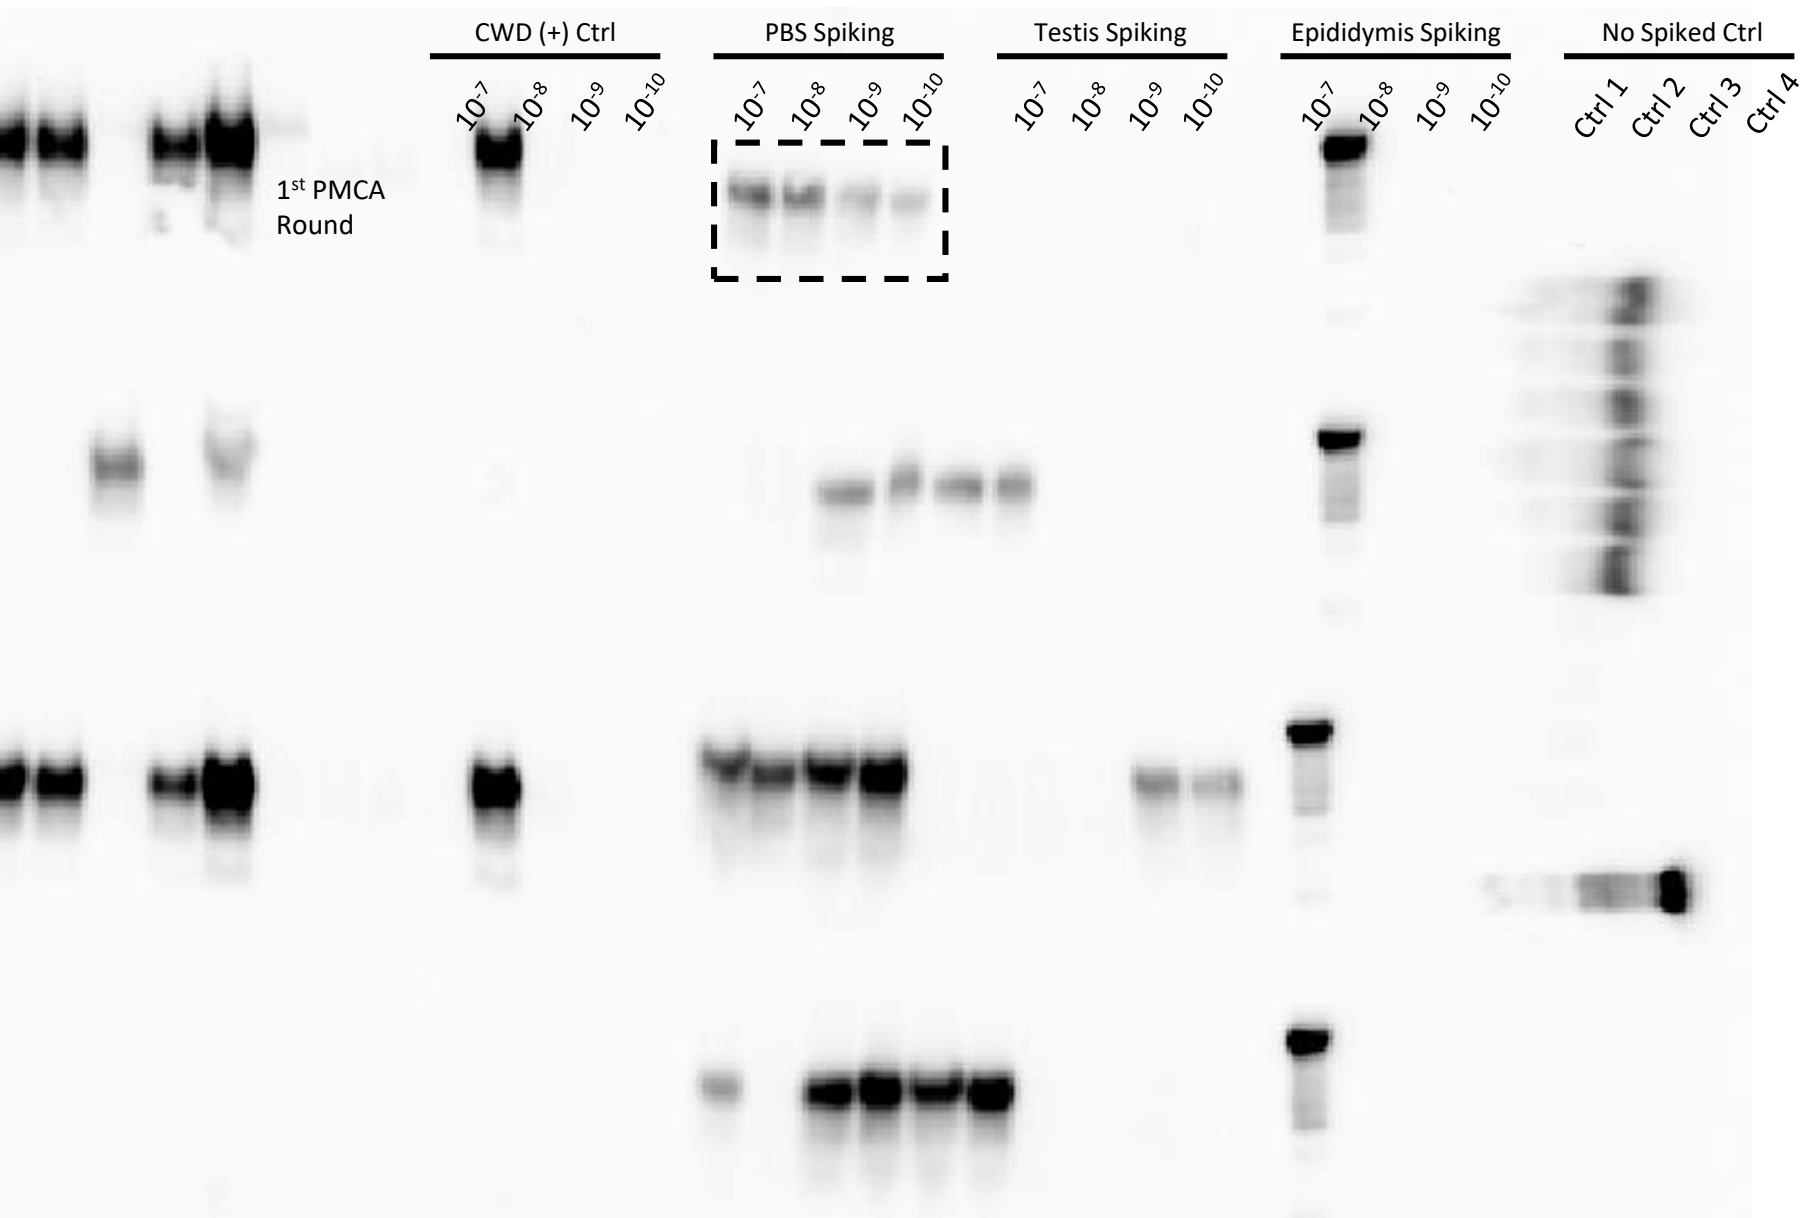

Figure 4

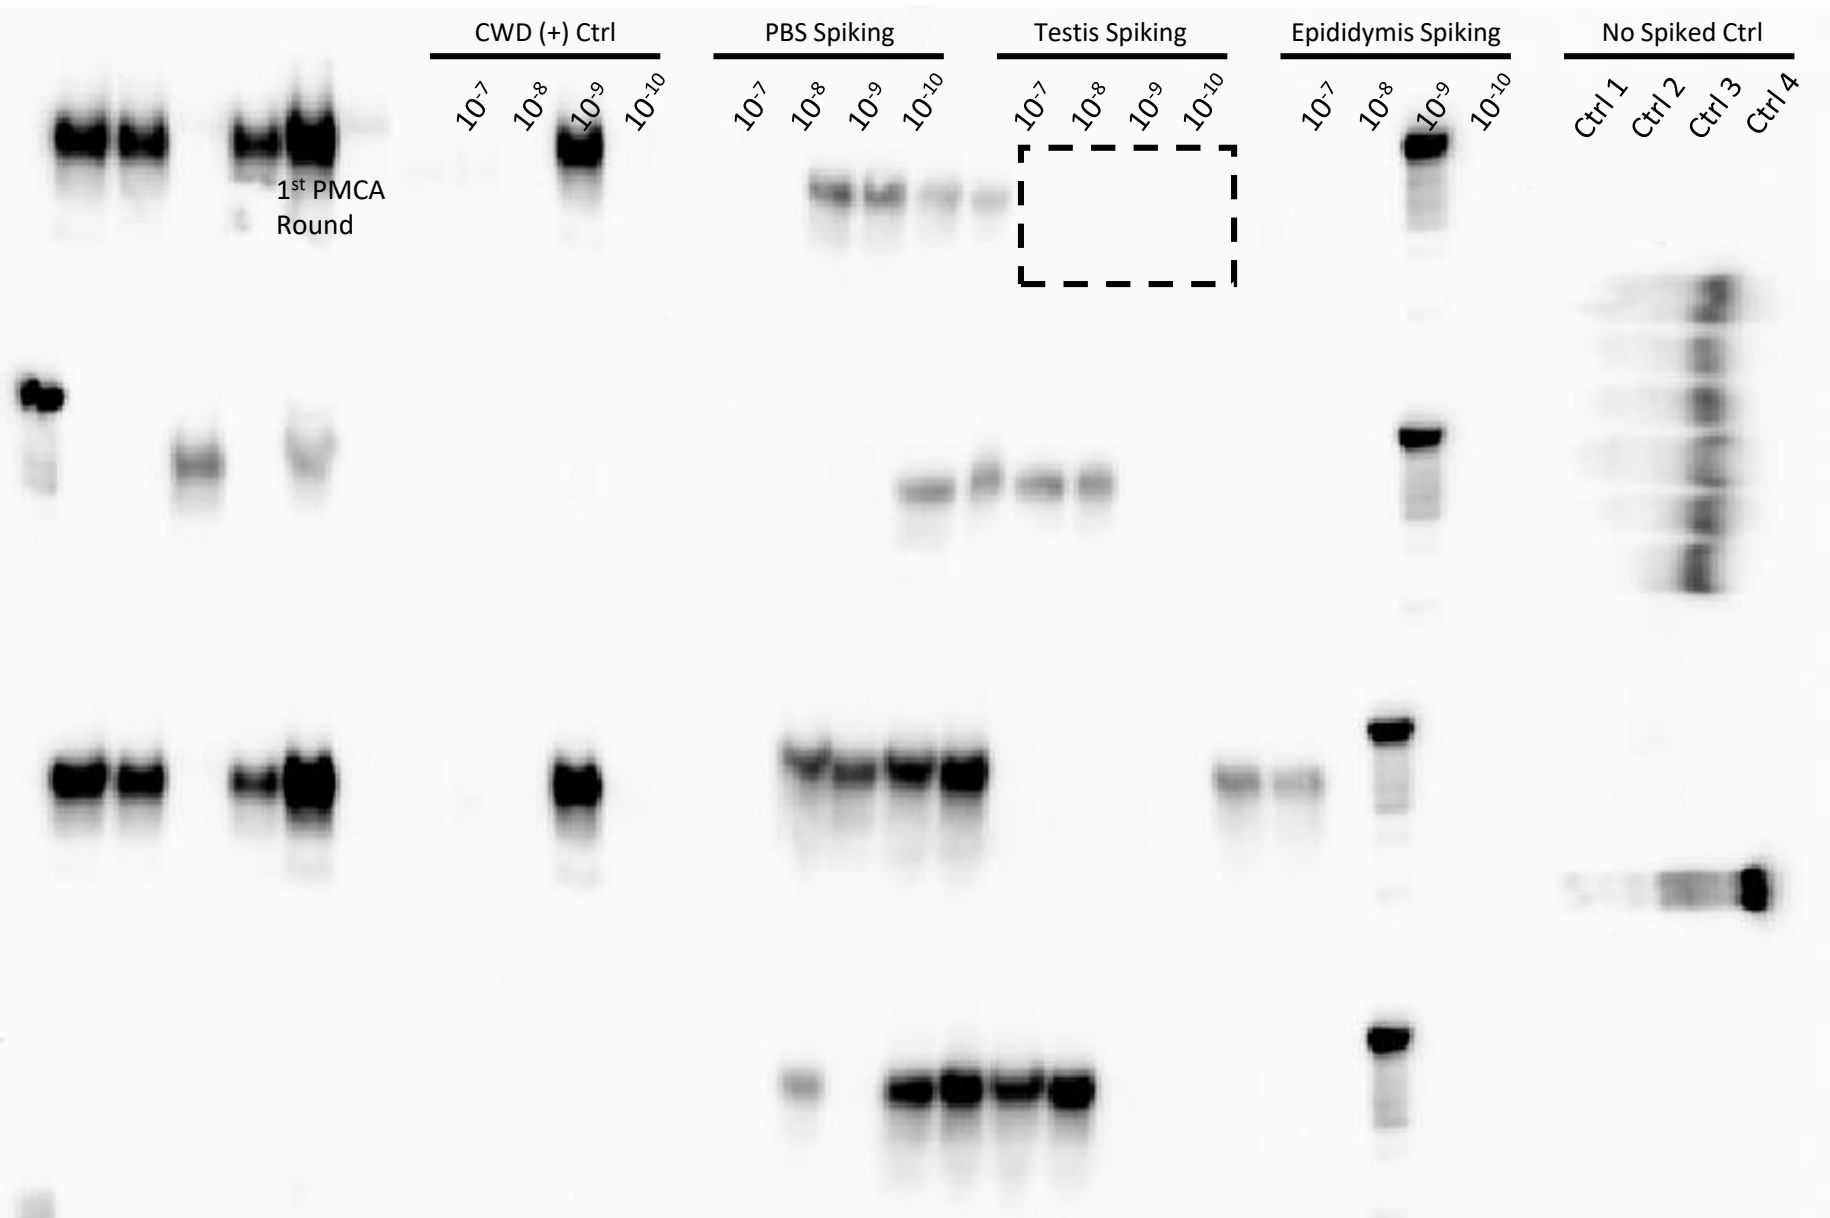

Figure 4

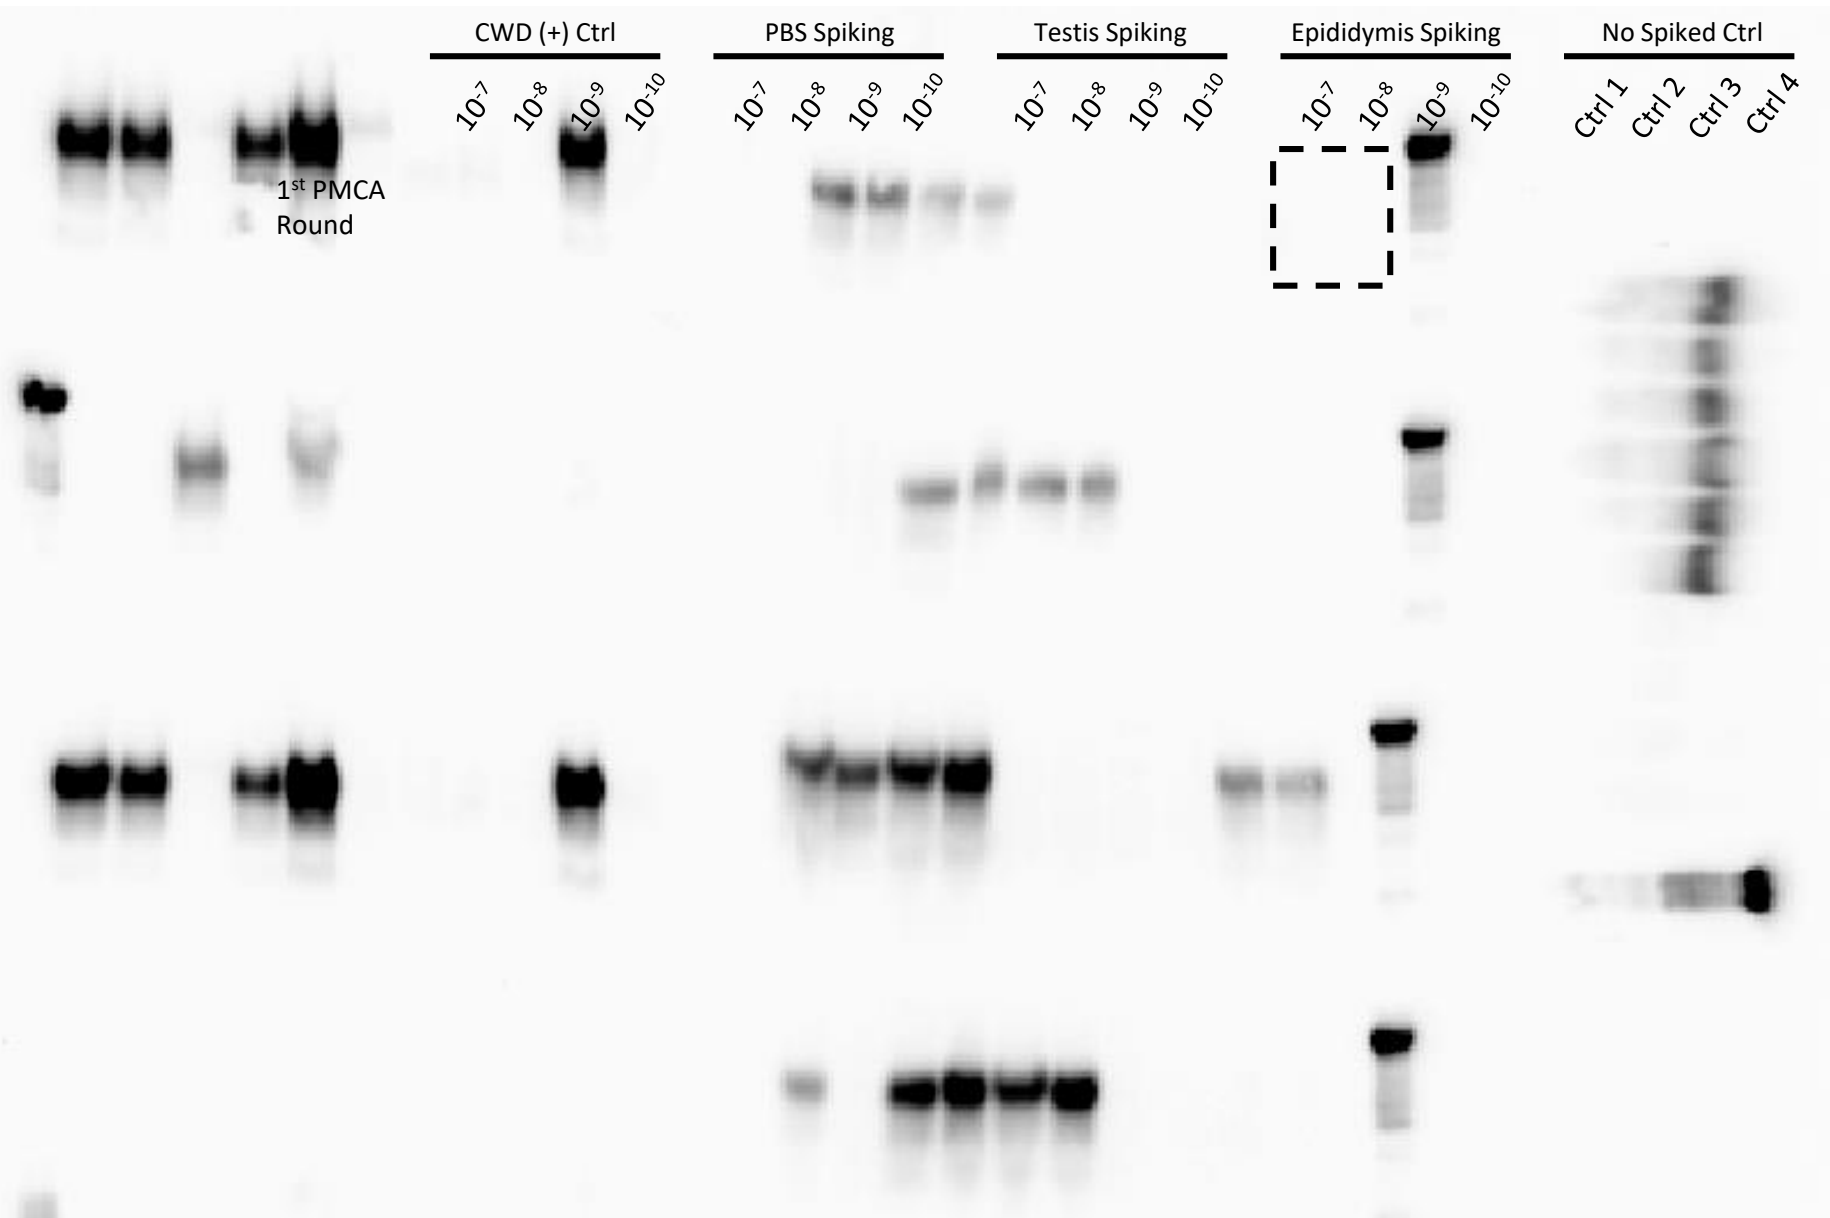

Figure 4

1<sup>st</sup> PMCA  
Round

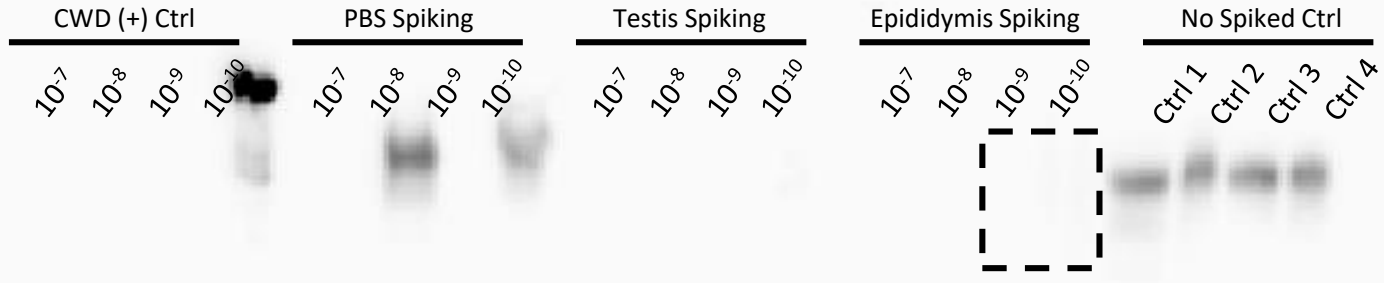

1<sup>st</sup> PMCA  
Round

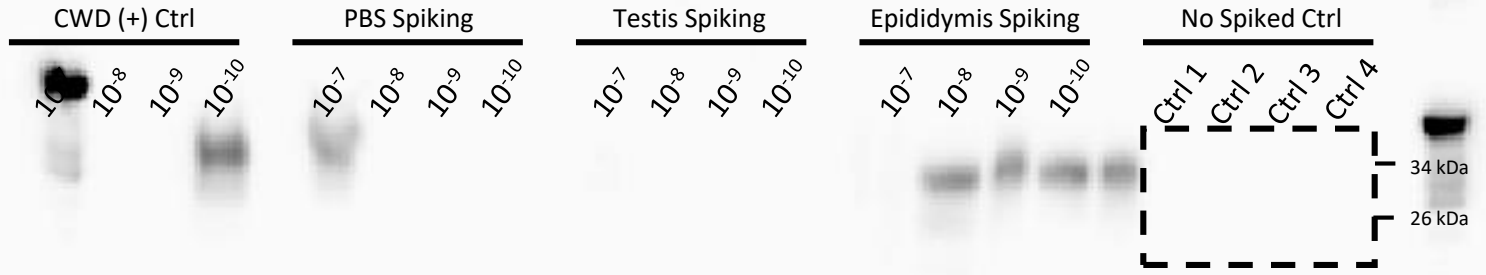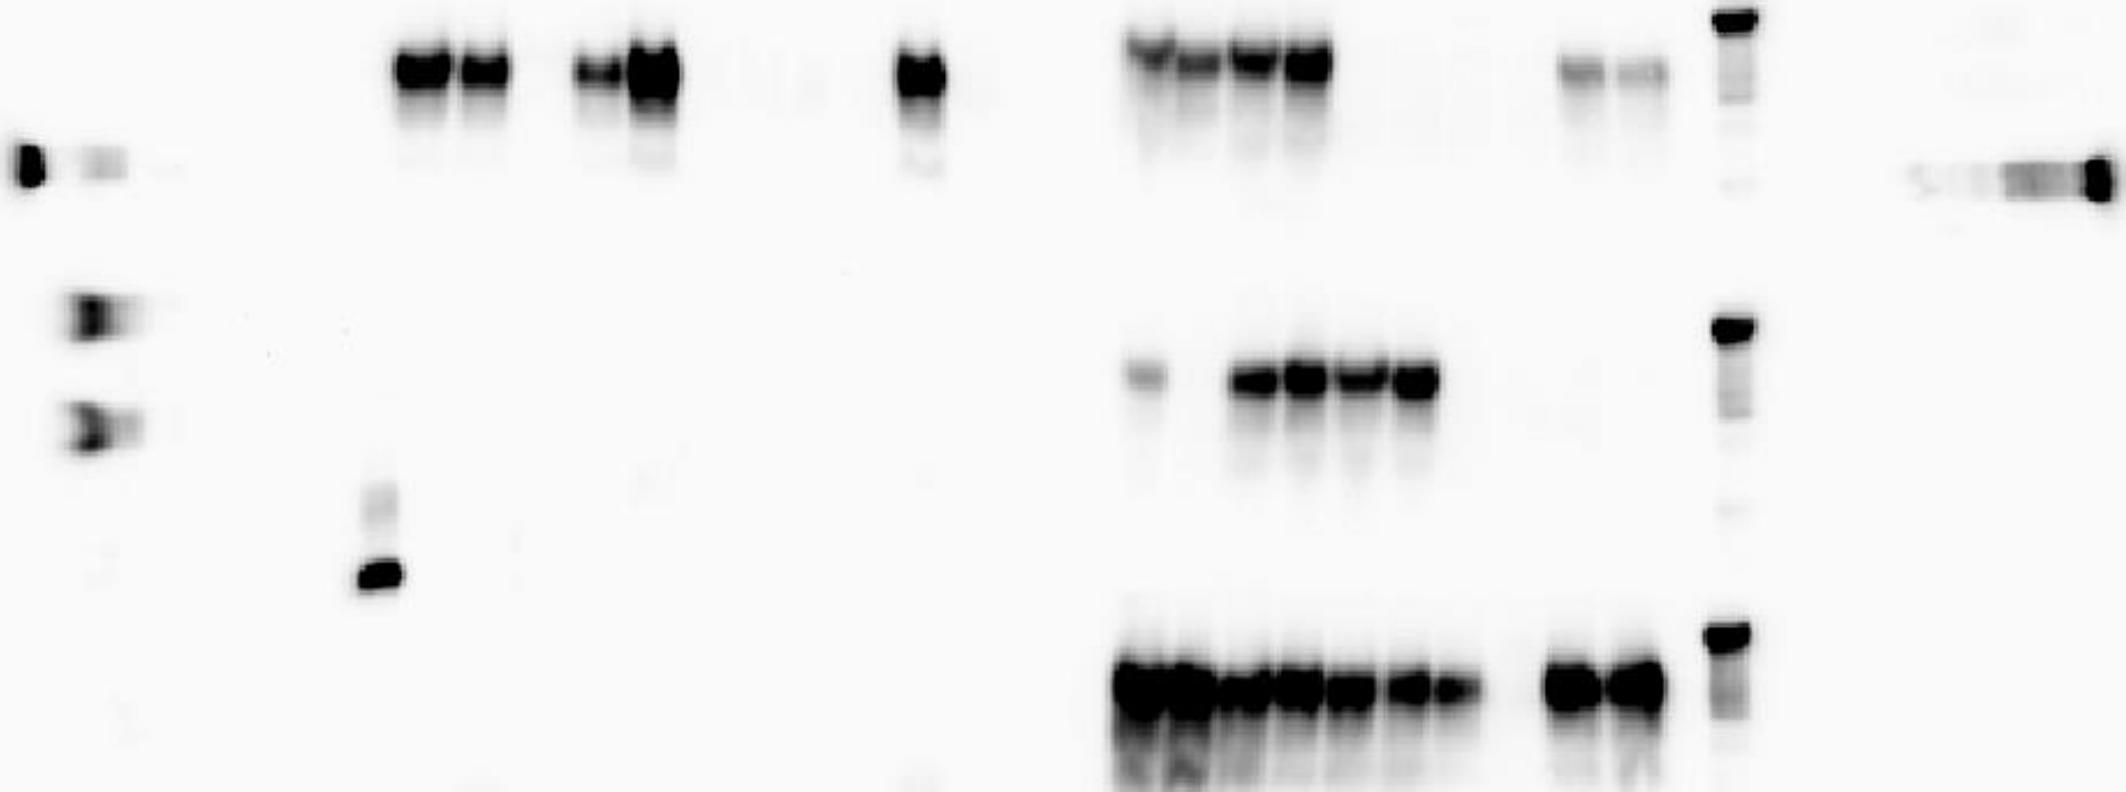

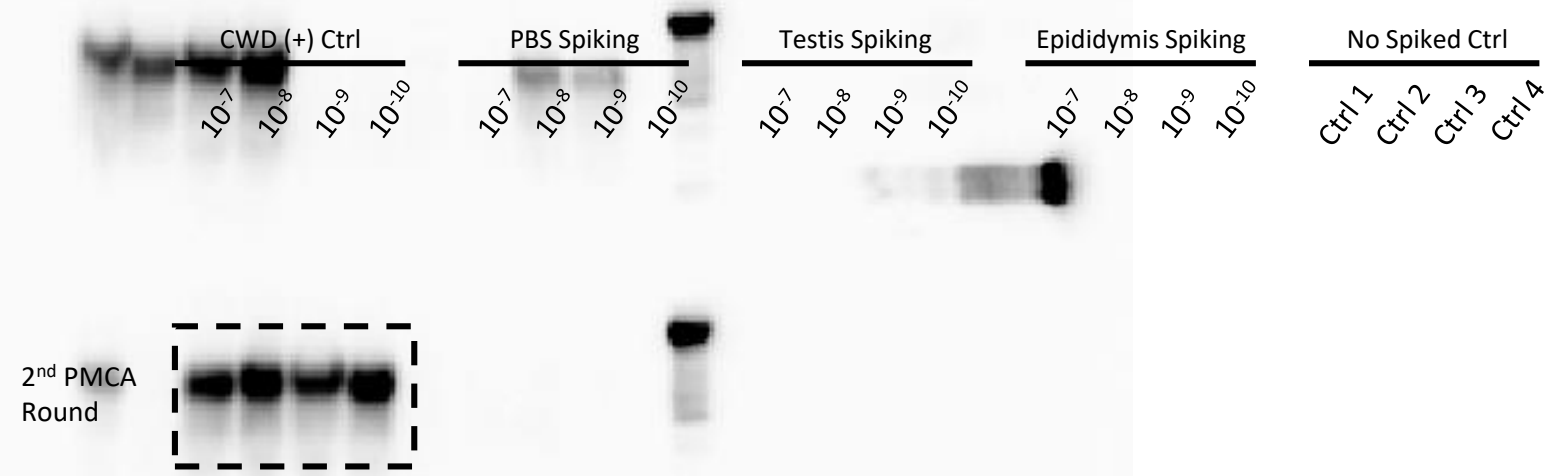

Figure 4

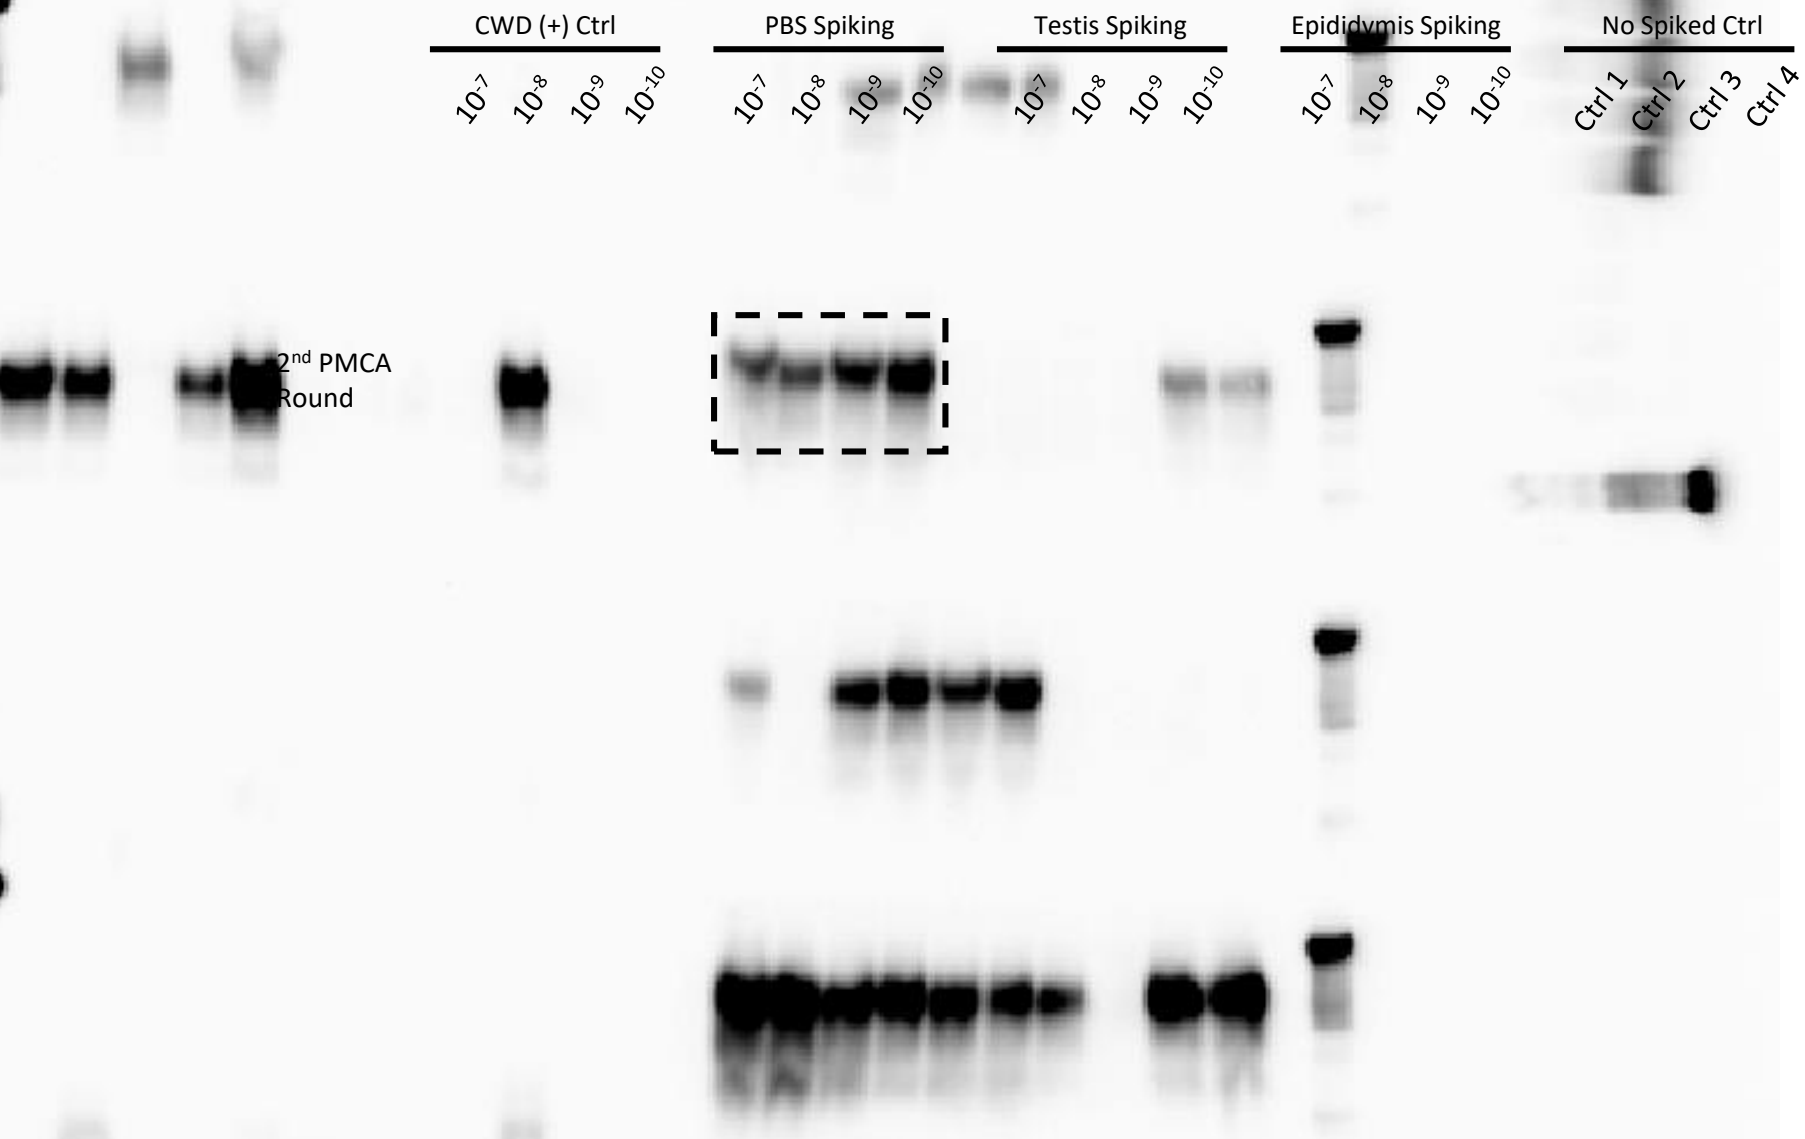



Figure 4

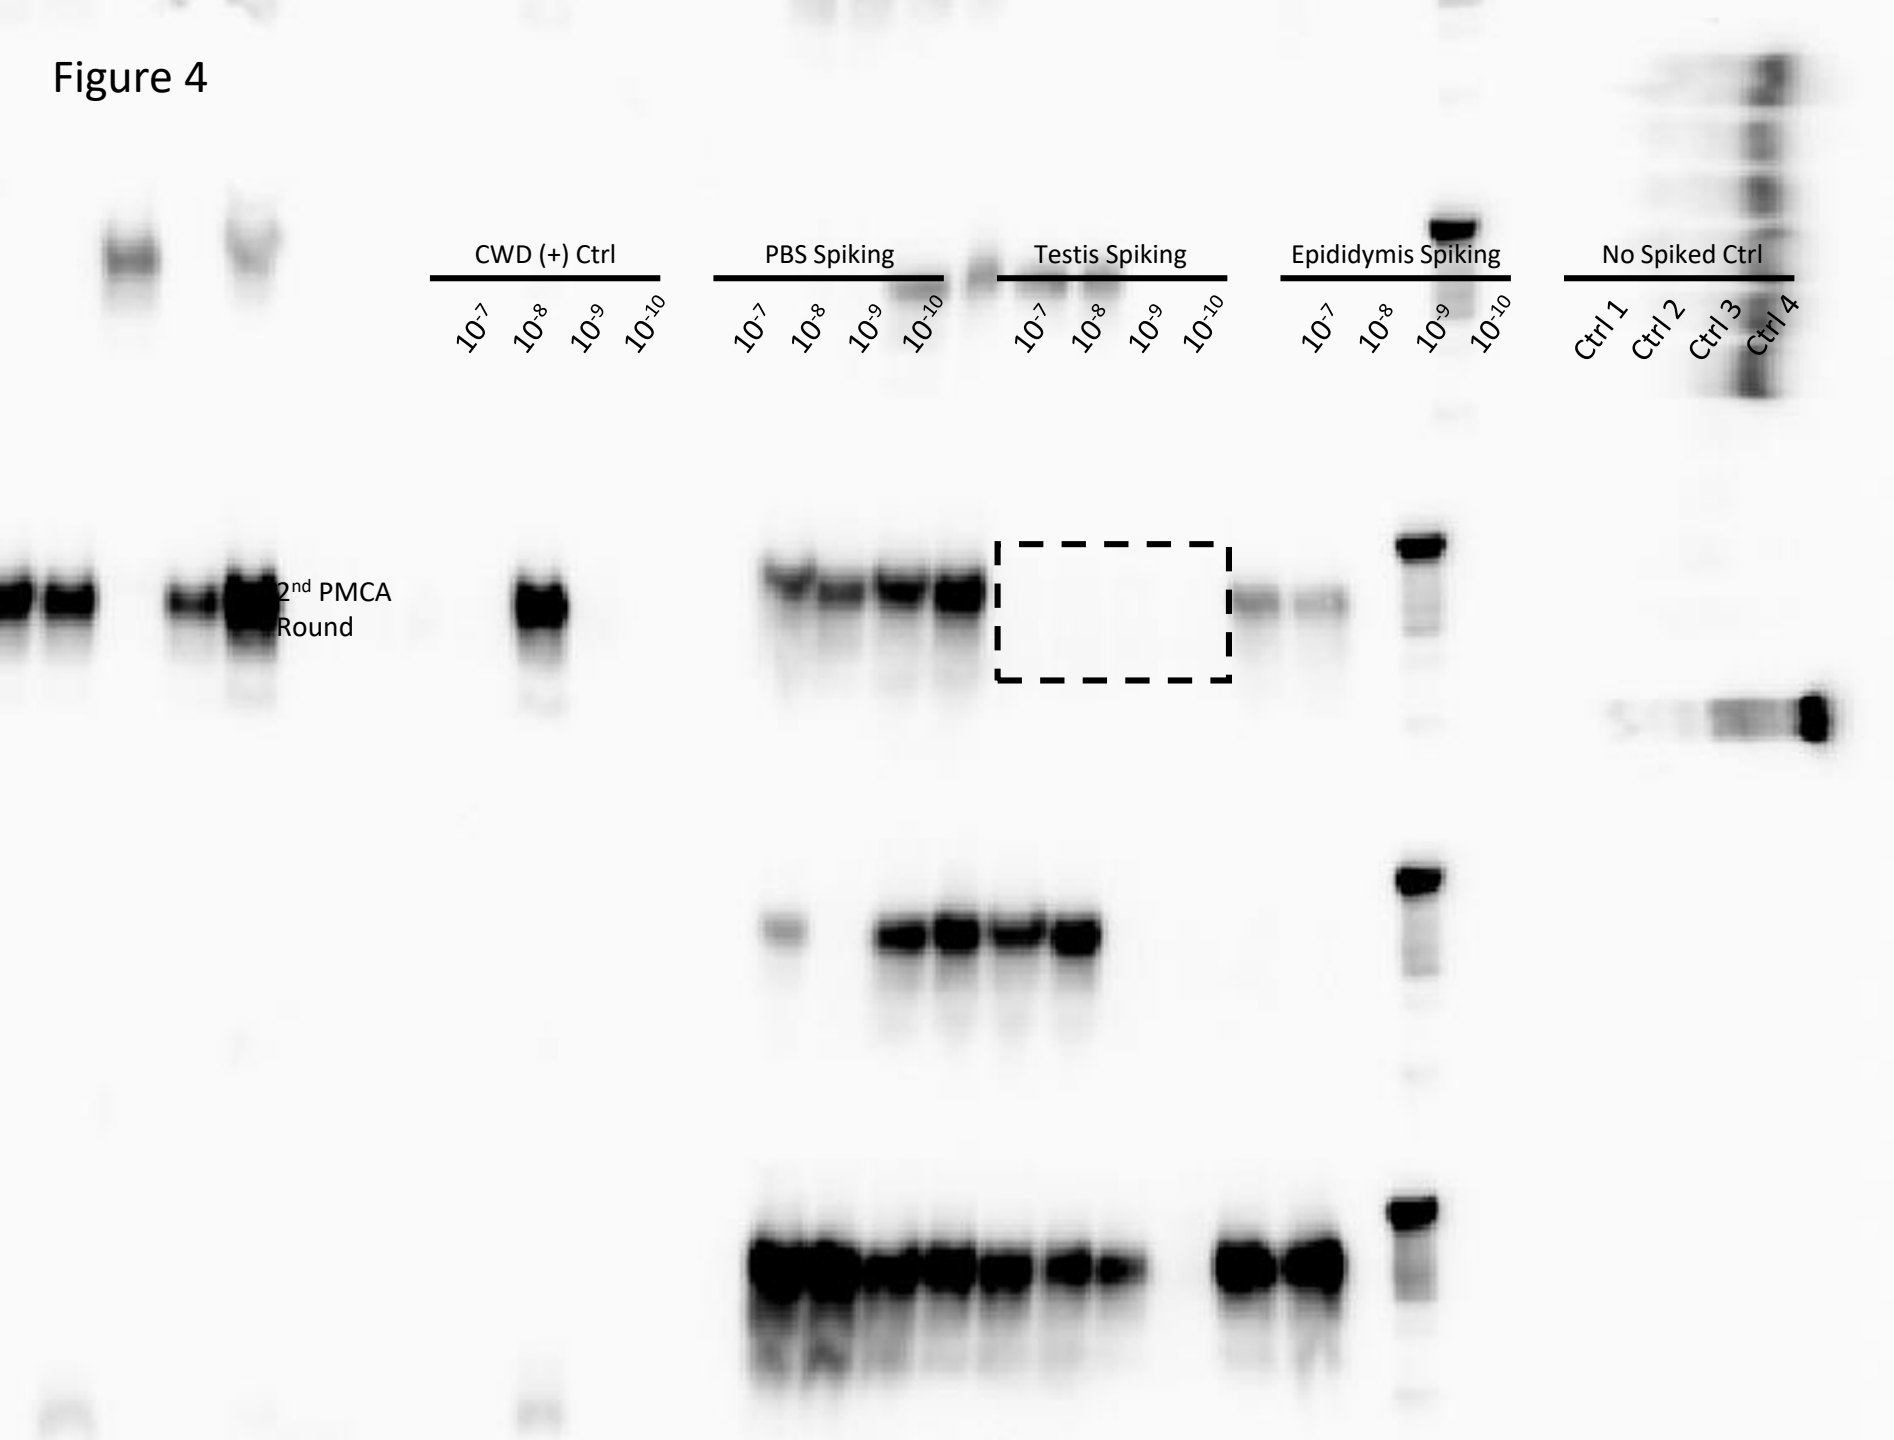

Figure 4

CWD (+) Ctrl      PBS Spiking      Testis Spiking      Epididymis Spiking      No Spiked Ctrl

$10^{-7}$   $10^{-8}$   $10^{-9}$   $10^{-10}$        $10^{-7}$   $10^{-8}$   $10^{-9}$   $10^{-10}$        $10^{-7}$   $10^{-8}$   $10^{-9}$   $10^{-10}$        $10^{-7}$   $10^{-8}$   $10^{-9}$   $10^{-10}$       Ctrl 1 Ctrl 2 Ctrl 3 Ctrl 4

2<sup>nd</sup> PM  
Round

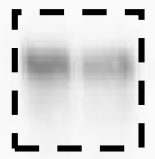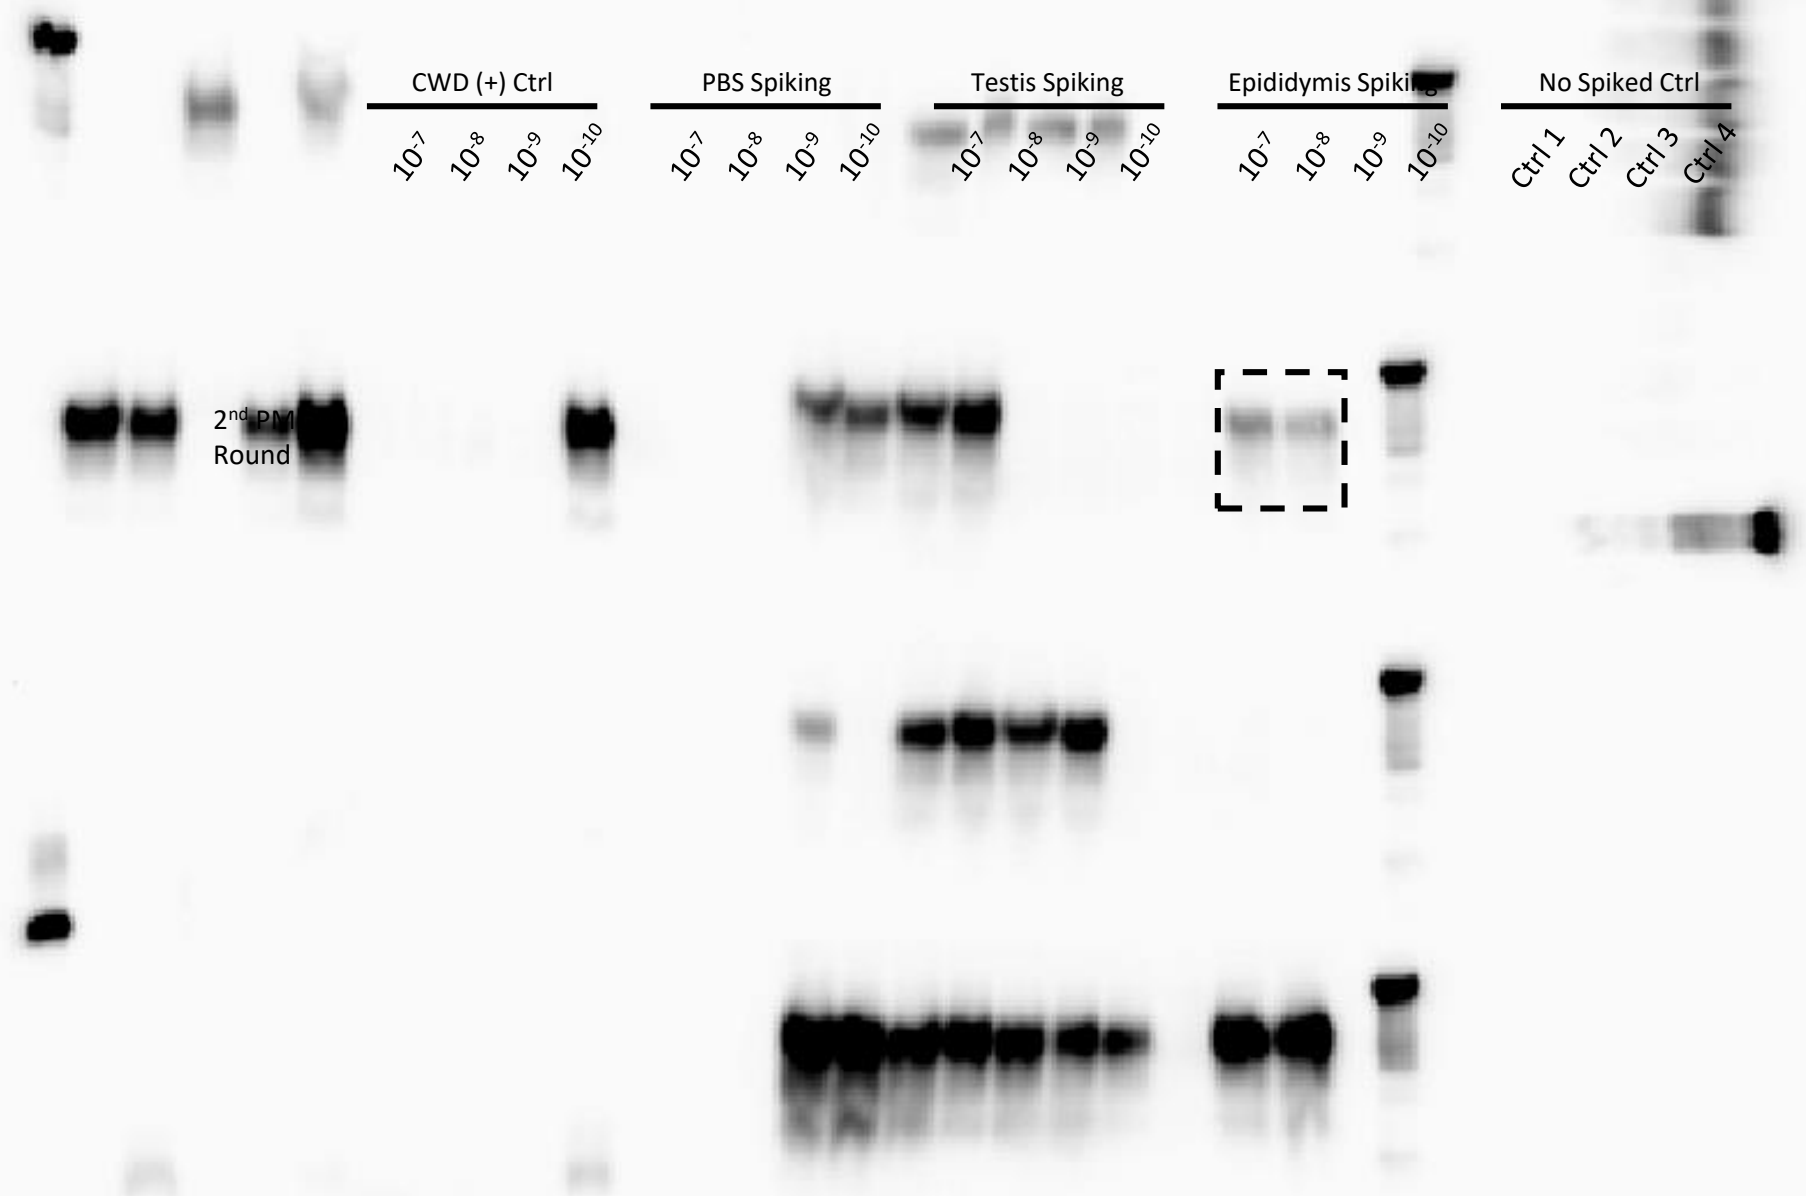

Figure 4

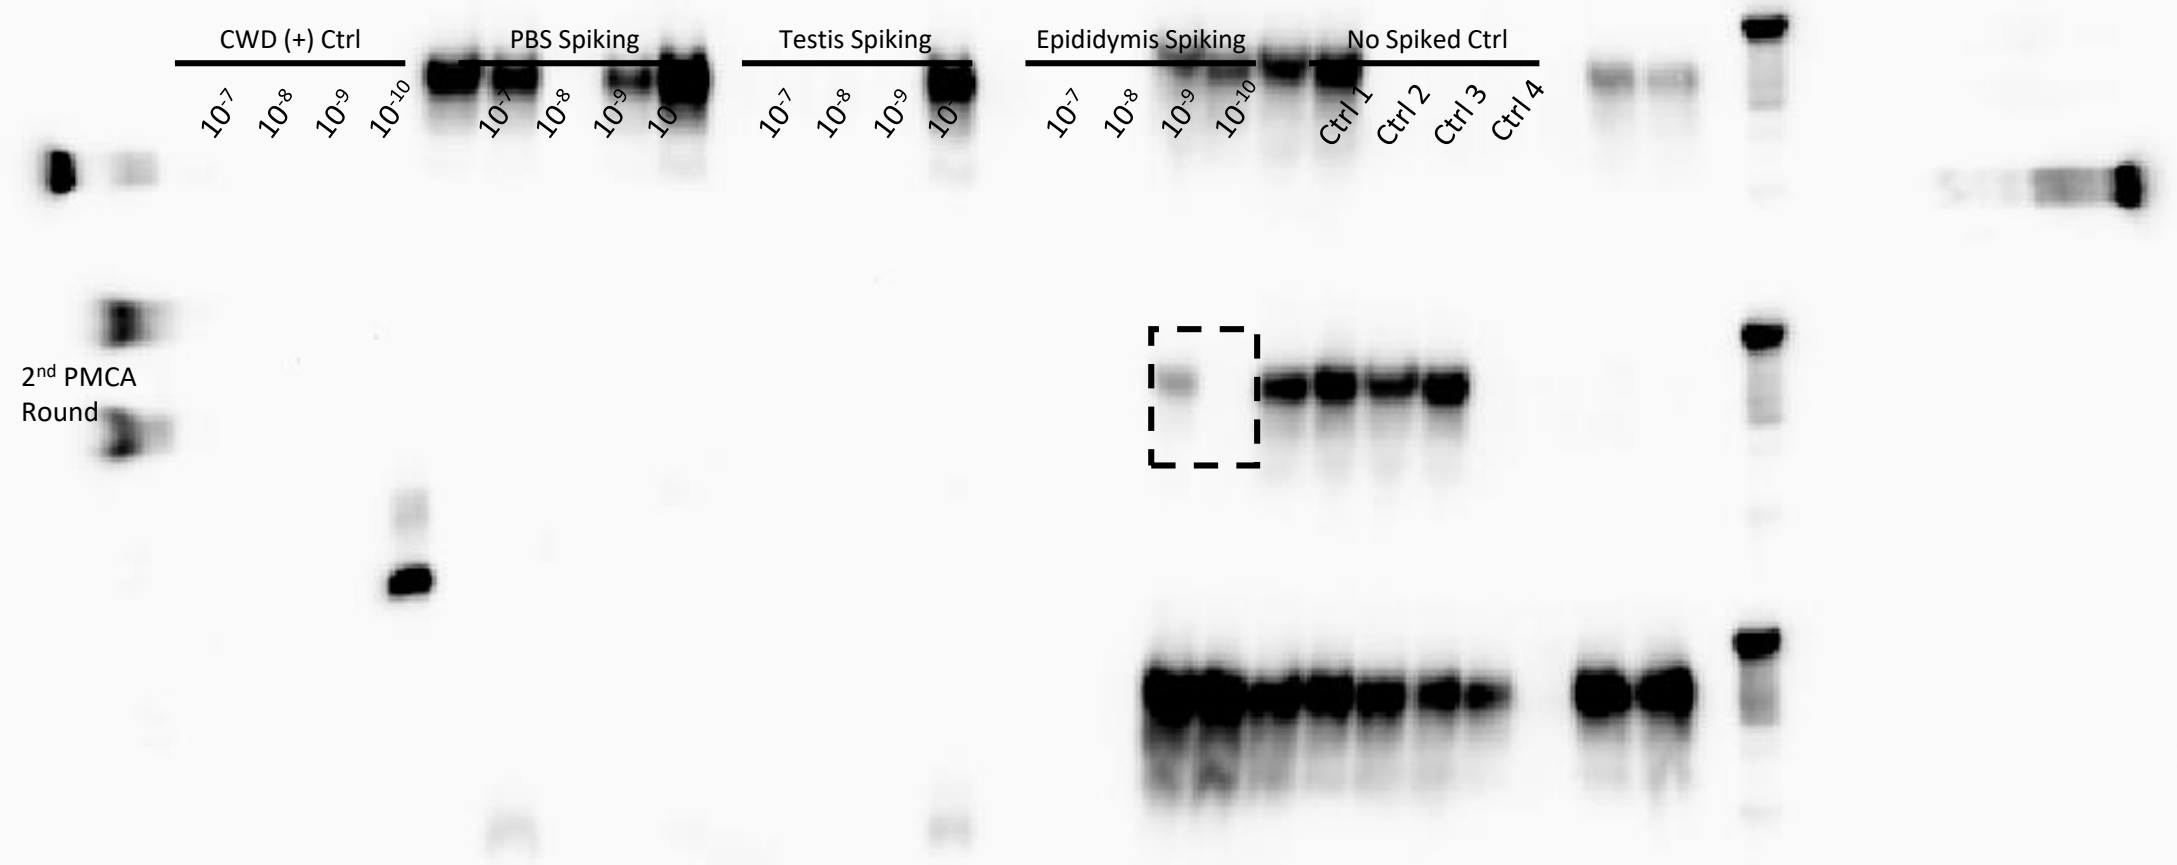

Figure 4

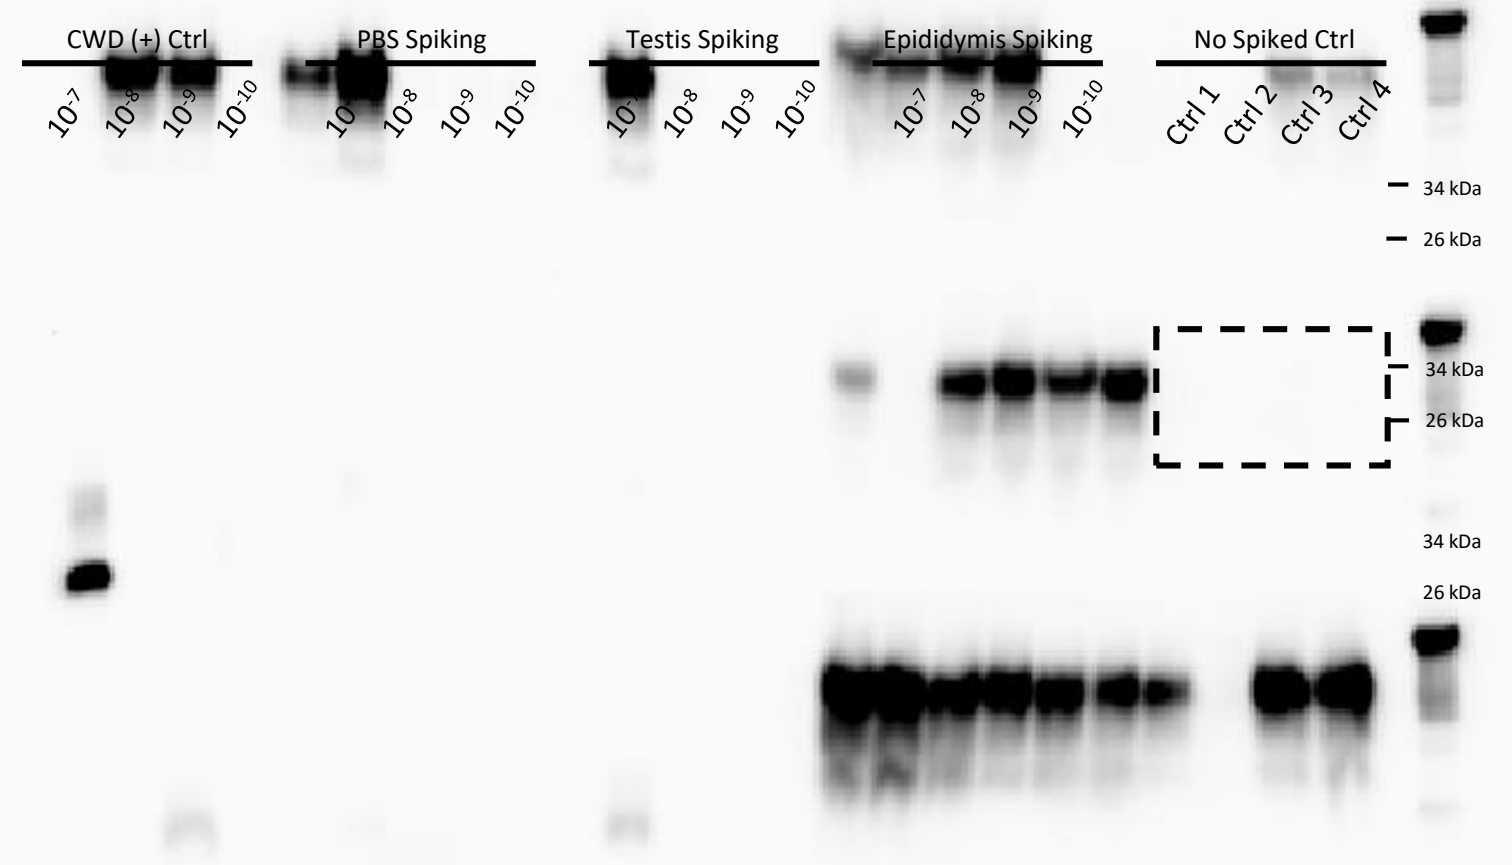

Figure 4

| CWD (+) Ctrl |           |           |            | PBS Spiking |           |           |            | Testis Spiking |           |           |            | Epididymis Spiking |           |           |            | No Spiked Ctrl |        |        |        |
|--------------|-----------|-----------|------------|-------------|-----------|-----------|------------|----------------|-----------|-----------|------------|--------------------|-----------|-----------|------------|----------------|--------|--------|--------|
| $10^{-7}$    | $10^{-8}$ | $10^{-9}$ | $10^{-10}$ | $10^{-7}$   | $10^{-8}$ | $10^{-9}$ | $10^{-10}$ | $10^{-7}$      | $10^{-8}$ | $10^{-9}$ | $10^{-10}$ | $10^{-7}$          | $10^{-8}$ | $10^{-9}$ | $10^{-10}$ | Ctrl 1         | Ctrl 2 | Ctrl 3 | Ctrl 4 |

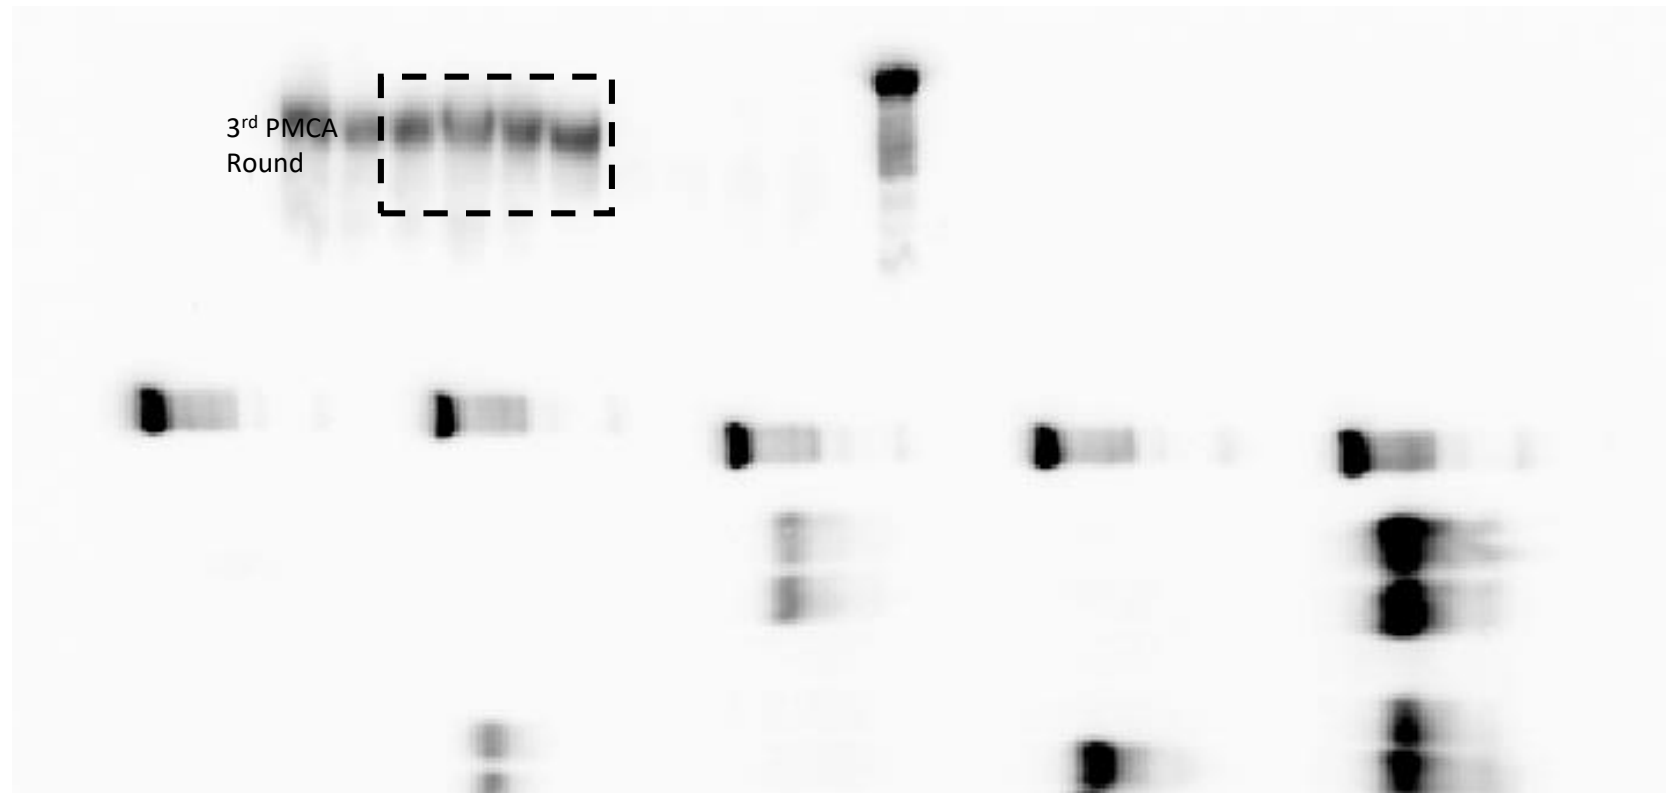

Figure 4

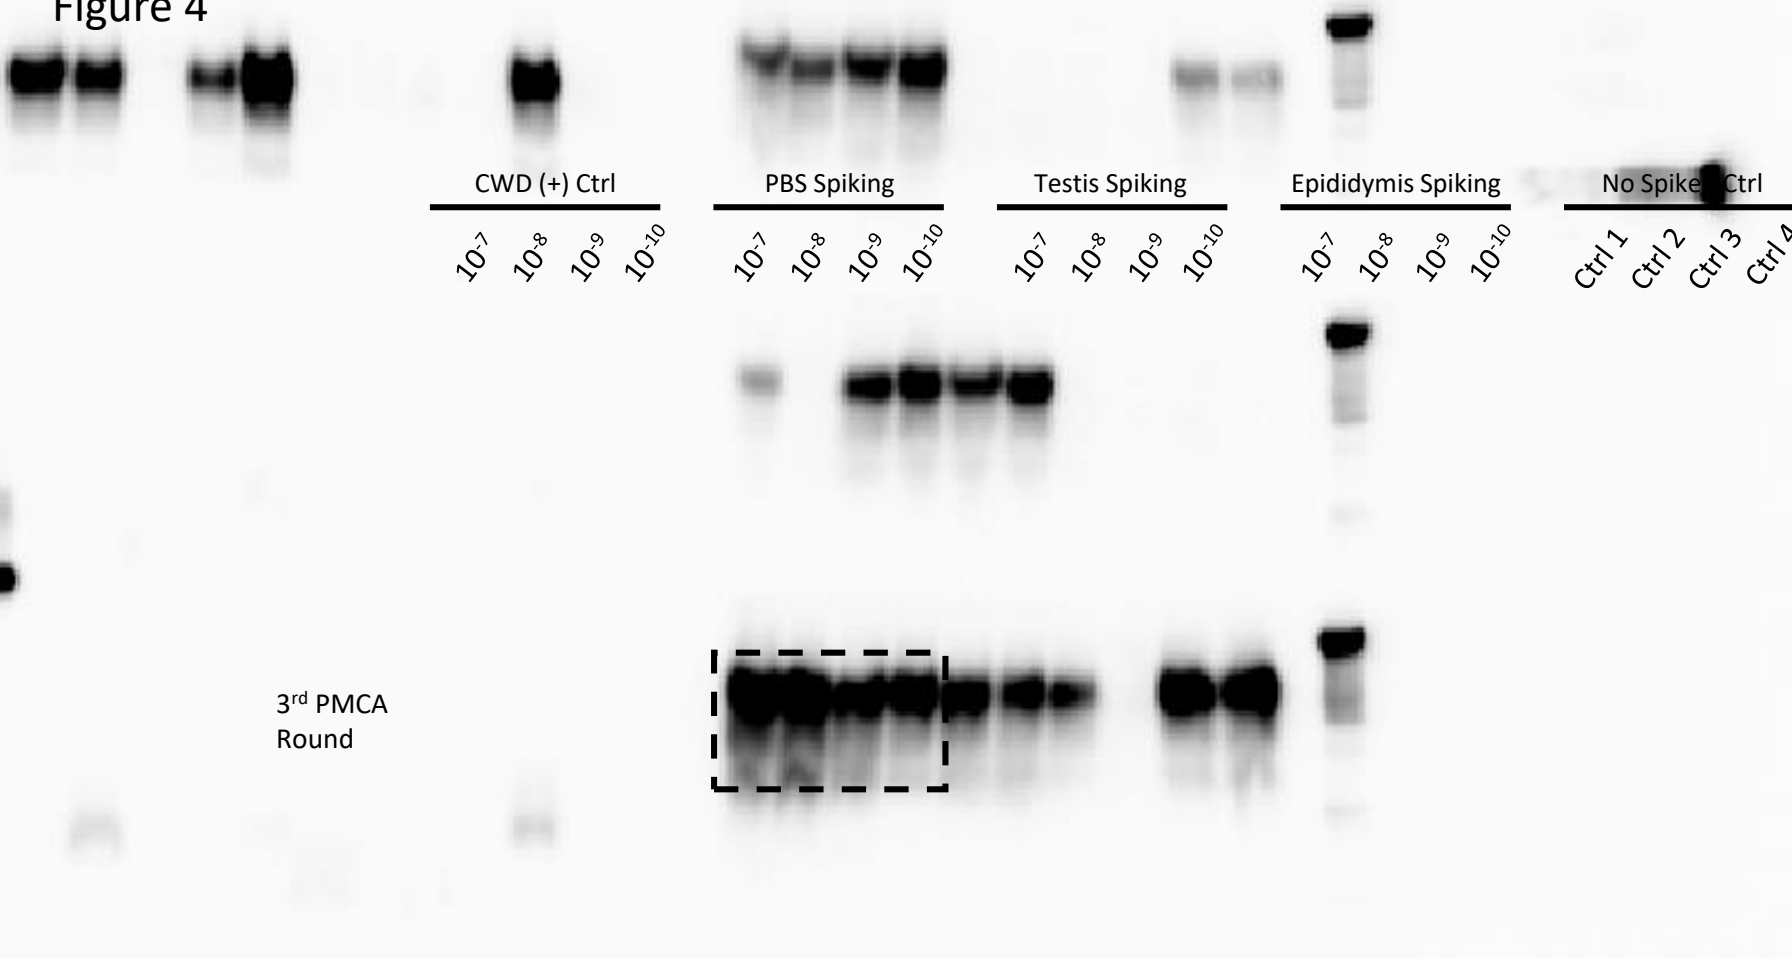

Figure 4

3<sup>rd</sup> PMCA Round

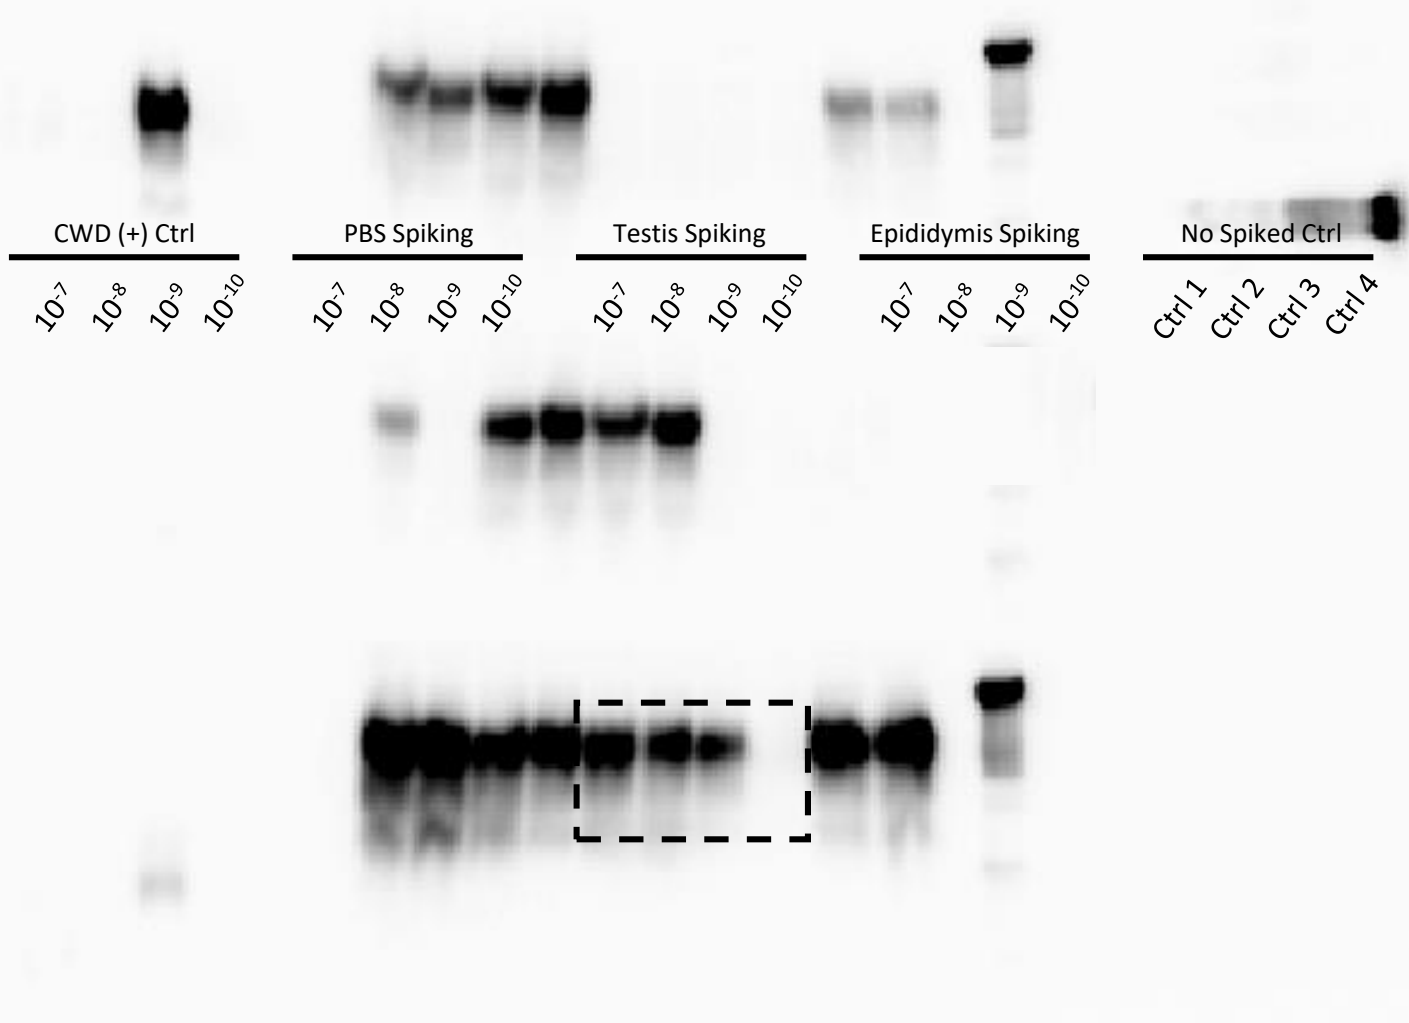

3<sup>rd</sup> PMCA  
Round

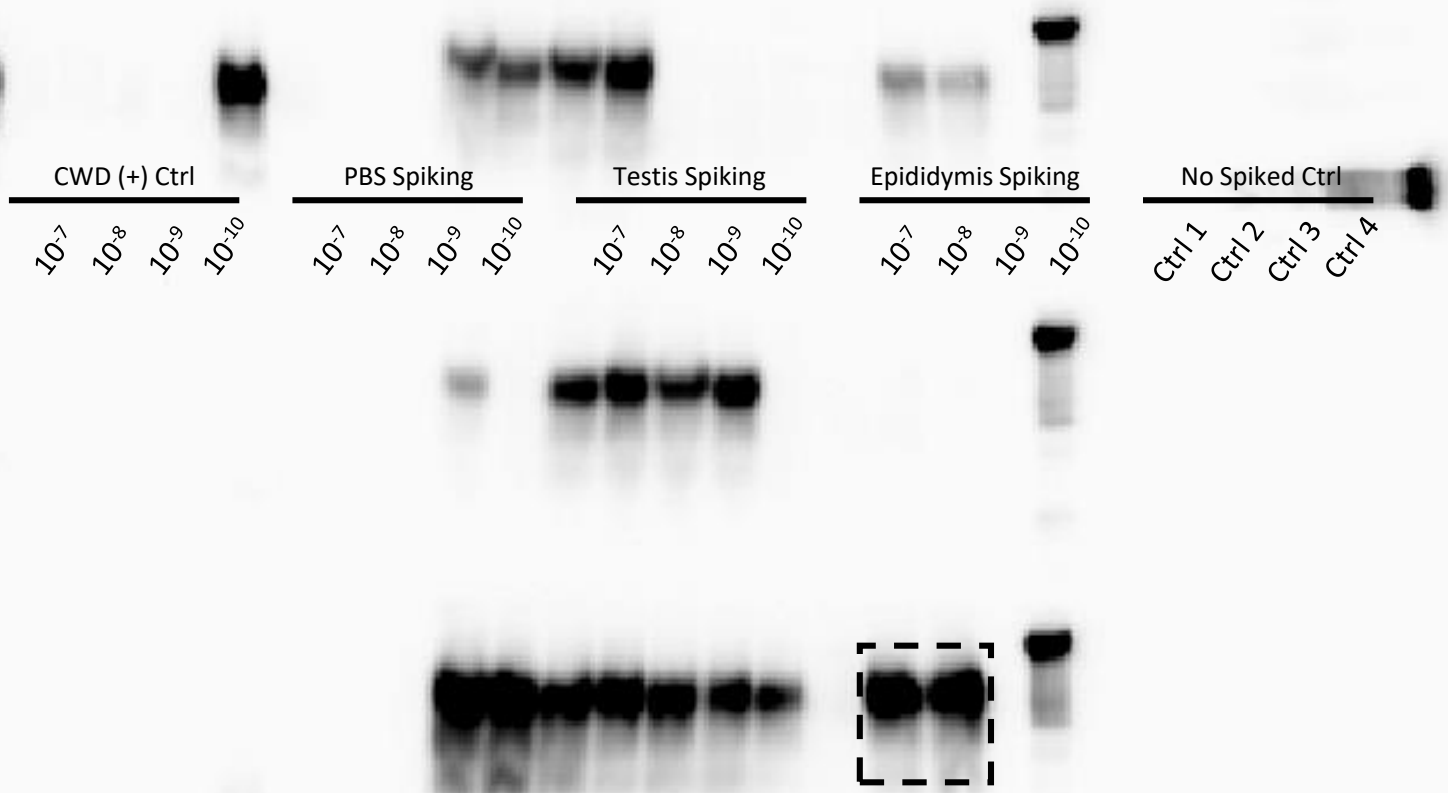



Figure 4

3<sup>rd</sup> PMCA  
Round

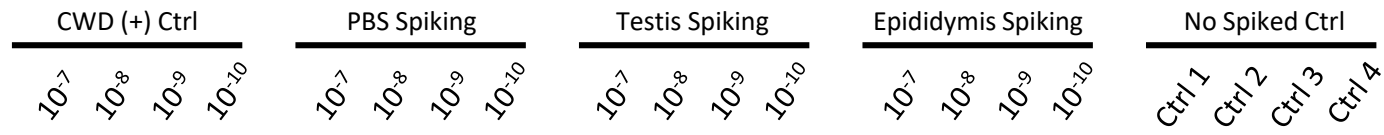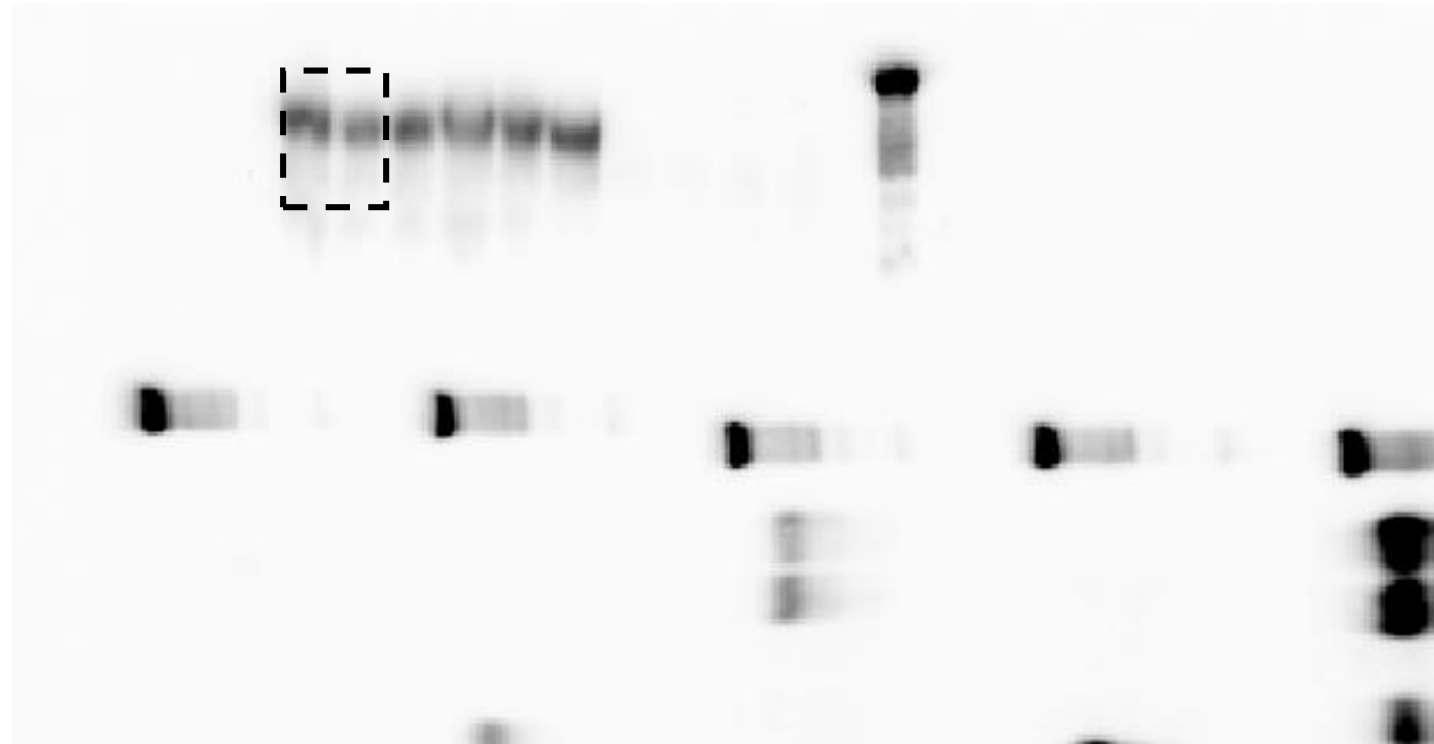

Figure 4

| CWD (+) Ctrl |           |           |            | PBS Spiking |           |           |            | Testis Spiking |           |           |            | Epididymis Spiking |           |           |            | No Spiked Ctrl |        |        |        |
|--------------|-----------|-----------|------------|-------------|-----------|-----------|------------|----------------|-----------|-----------|------------|--------------------|-----------|-----------|------------|----------------|--------|--------|--------|
| $10^{-7}$    | $10^{-8}$ | $10^{-9}$ | $10^{-10}$ | $10^{-7}$   | $10^{-8}$ | $10^{-9}$ | $10^{-10}$ | $10^{-7}$      | $10^{-8}$ | $10^{-9}$ | $10^{-10}$ | $10^{-7}$          | $10^{-8}$ | $10^{-9}$ | $10^{-10}$ | Ctrl 1         | Ctrl 2 | Ctrl 3 | Ctrl 4 |

3<sup>rd</sup> PMCA  
Round

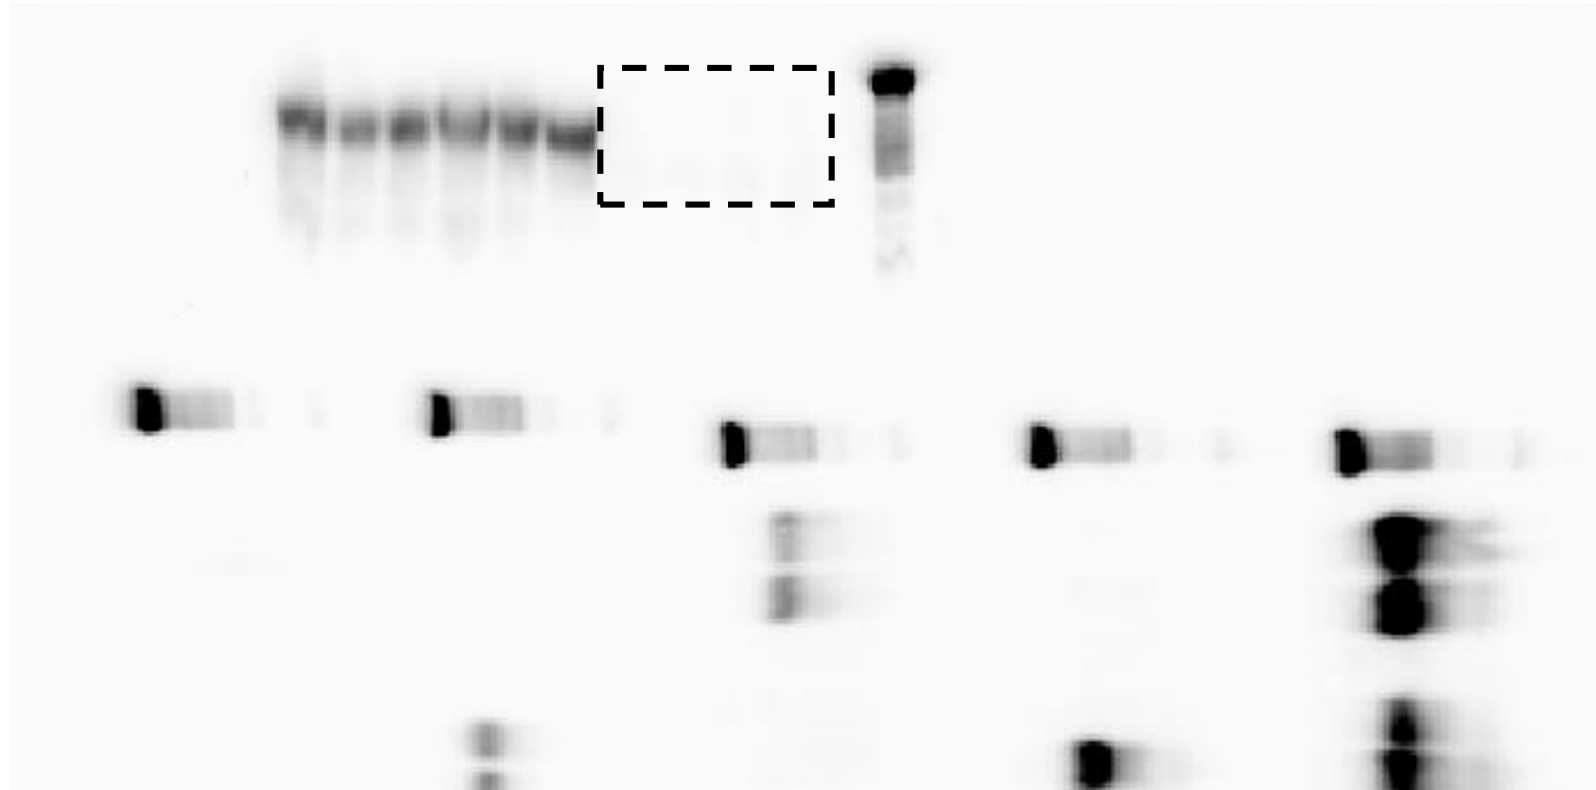

Supplement: pone.0226560.s002.pdf [file pone.0226560.s002.pdf]
