# Supplementary material for: In Vitro detection of Chronic Wasting Disease (CWD) prions in semen and reproductive tissues of white tailed deer bucks (Odocoileus virginianus)
Source: PubMed Central journal article supplement (PMC6936793; doi:10.1371/journal.pone.0226560), 2019-12-30

S1 Figure

A)

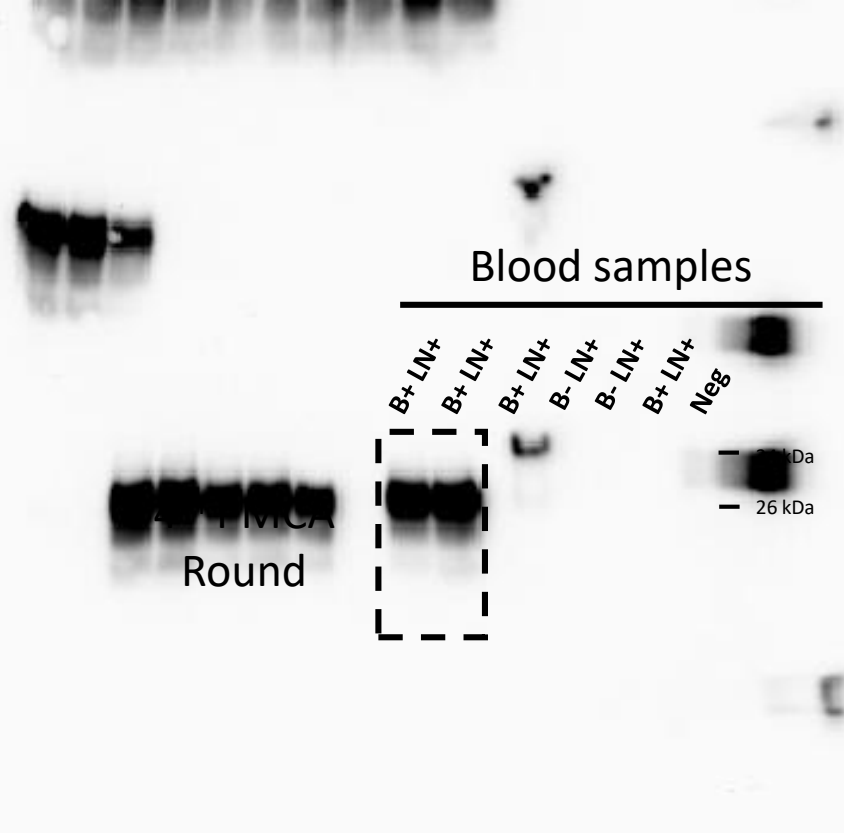

S1 Figure

A)

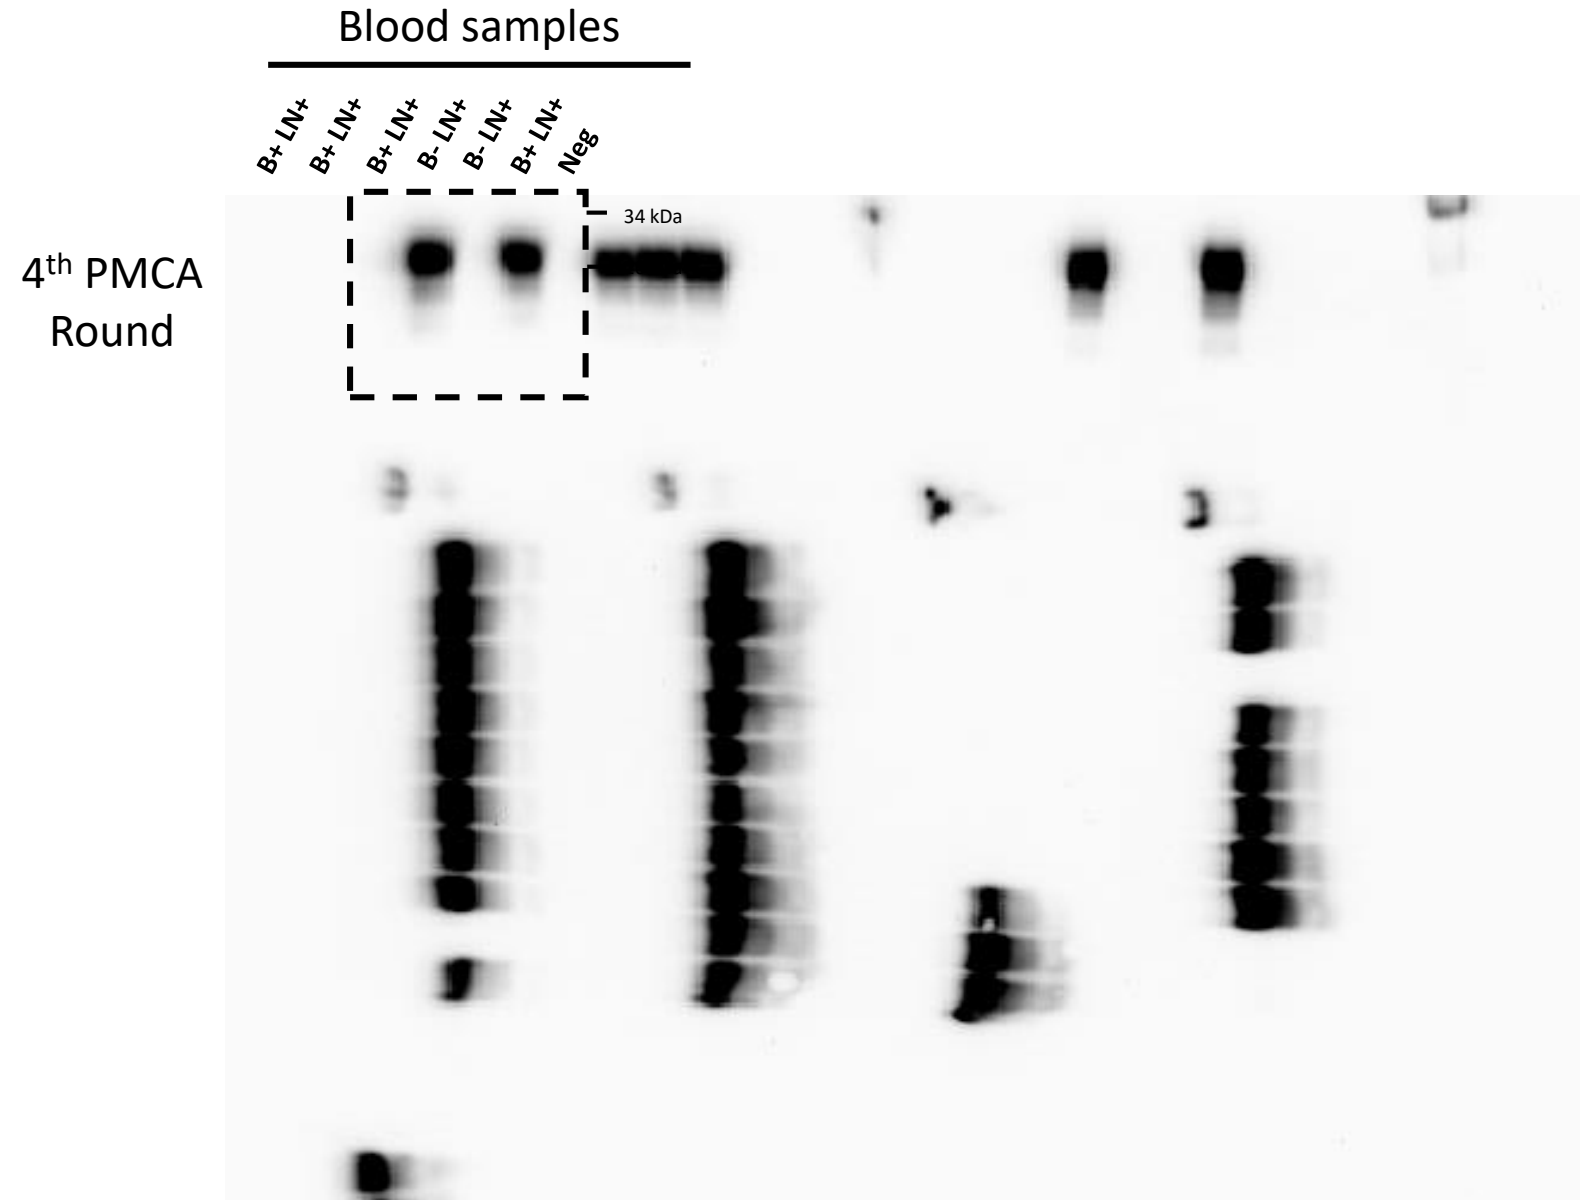

Supplement: pone.0226560.s003.pdf [file pone.0226560.s003.pdf]
